# Supplementary material for: Regioselective one-pot protection, protection–glycosylation and protection–glycosylation–glycosylation of carbohydrates: a case study withd-glucose
Source: Royal Society of Chemistry journal article supplement (doi:10.1039/c3ob42097c), 2013-11-22

## ELECTRONIC SUPPLEMENTARY INFORMATION

### Regioselective One-Pot Protection, Protection–Glycosylation and Protection–Glycosylation–Glycosylation of Carbohydrates: A Case Study with D-Glucose

Teng-Yi Huang, Medel Manuel L. Zulueta, and Shang-Cheng Hung\*

*Genomics Research Center & Institute of Chemistry, Academia Sinica, 128, Section 2, Academia  
Road, Taipei 115, Taiwan*

**General considerations.** CH<sub>2</sub>Cl<sub>2</sub> was purified and dried from a safe purification system filled with anhydrous Al<sub>2</sub>O<sub>3</sub>. Dry CH<sub>3</sub>CN was freshly distilled from CaH<sub>2</sub> under N<sub>2</sub> atmosphere. All other reagents were obtained from commercial sources and used without further purification. Water was either distilled or Milli-Q-purified. Flash column chromatography was carried out on Silica Gel 60 (230–400 mesh, E. Merck). TLC was performed on glass plates pre-coated with Silica Gel 60 F254 (0.25 mm, E. Merck); detection was executed by spraying with a solution of Ce(NH<sub>4</sub>)<sub>2</sub>(NO<sub>3</sub>)<sub>6</sub>, (NH<sub>4</sub>)<sub>6</sub>Mo<sub>7</sub>O<sub>24</sub>, and H<sub>2</sub>SO<sub>4</sub> in water followed subsequent heating on a hot plate. Specific rotations were taken at ambient conditions and reported in 10<sup>-1</sup>·deg·cm<sup>2</sup>·g<sup>-1</sup>; the sample concentrations are in g·dL<sup>-1</sup>. <sup>1</sup>H and <sup>13</sup>C NMR spectra were recorded on 400 and 600 MHz spectrometers. Proton peaks were assigned with the aid of 2D NMR techniques (<sup>1</sup>H-<sup>1</sup>H COSY, HMQC and NOESY). Coupling constants are given in Hz. The hydrogen multiplicities of carbon peaks were determined using DEPT-90 and DEPT-135 experiments.

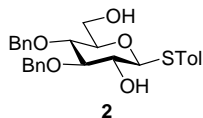

**4-Methylphenyl 3,4-di-O-benzyl-1-thio- $\beta$ -D-glucopyranoside (2).** TMSOTf (5  $\mu$ L, 26  $\mu$ mol) was added to a solution of compound **1** (100 mg, 174  $\mu$ mol) and benzaldehyde (19  $\mu$ L, 190  $\mu$ mol) in  $\text{CH}_2\text{Cl}_2$  (1 mL) with freshly dried 3 Å molecular sieves (120 mg) at  $-78^\circ\text{C}$  under  $\text{N}_2$  atmosphere. The mixture was kept stirring at same temperature for 2 h.  $\text{Et}_3\text{SiH}$  (31  $\mu$ L, 190  $\mu$ mol), benzaldehyde (18  $\mu$ L, 183  $\mu$ mol) and TMSOTf (5  $\mu$ L, 26  $\mu$ mol) were sequentially added to the reaction solution. After stirring for 2.5 h at  $-78^\circ\text{C}$ , the reaction flask was moved to  $0^\circ\text{C}$ , and  $\text{BH}_3\cdot\text{THF}$  (1 M solution in THF, 0.87 mL, 0.87 mmol) was added to the reaction mixture, followed by addition of TMSOTf (16  $\mu$ L, 0.087 mmol). The solution was kept stirring for another 5 h at  $0^\circ\text{C}$ . The reaction was slowly quenched with MeOH (5 mL) and  $\text{Et}_3\text{N}$  (1 mL) at  $0^\circ\text{C}$ . The mixture was filtered through a pad of Celite, and the filtrate was coevaporated with MeOH under reduced pressure. The residue was partitioned between ethyl acetate and  $\text{H}_2\text{O}$  and the combined organic layer was washed with brine, dried over anhydrous  $\text{MgSO}_4$ , filtered and concentrated under reduced pressure. Purification of the residue by flash column chromatography (ethyl acetate/hexanes = 1/2) gave the 2,6-diol **2** (70 mg, 86%) as a white solid. m.p.  $115\text{--}118^\circ\text{C}$ ;  $[\alpha]_{\text{D}}^{28} -29.5$  ( $c$  0.9 in  $\text{CHCl}_3$ ); IR (thin film):  $\nu$  3391, 3031, 2875, 1495, 1454, 1090, 807, 733, 697  $\text{cm}^{-1}$ ;  $^1\text{H}$  NMR (400 MHz,  $\text{CDCl}_3$ ):  $\delta$  7.43 (2 H, d,  $J$  8.1, Ar-H), 7.38–7.28 (10 H, m, Ar-H), 7.12 (2 H, d,  $J$  8.1, Ar-H), 4.94 (1 H, d,  $J$  11.3,  $\text{ArCH}_2$ ), 4.86 (1 H, d,  $J$  11.3,  $\text{ArCH}_2$ ), 4.85 (1 H, d,  $J$  11.0,  $\text{ArCH}_2$ ), 4.64 (1 H, d,  $J$  11.0,  $\text{ArCH}_2$ ), 4.50 (1 H, d,  $J$  9.3, 1-H), 3.89 (1 H, d,  $J$  11.8, 6- $\text{H}_a$ ), 3.72–3.69 (1 H, m, 6- $\text{H}_b$ ), 3.61 (1 H, t,  $J$  9.3, 2-H), 3.52 (1 H, t,  $J$  9.3, 3-H), 3.50–3.39 (2 H, m, 4-H, 5-H), 2.71 (1H, d,  $J$  1.9, 2-OH), 2.33 (3 H, s,  $\text{CH}_3$ ), 2.27 (1 H, br s, 6-OH);  $^{13}\text{C}$  NMR (100 MHz,  $\text{CDCl}_3$ ):  $\delta$  138.5 (C), 138.4 (C), 137.8 (C), 133.3 (CH), 129.8 (CH),

128.4 (CH), 127.9 (CH), 127.87 (CH), 127.83 (CH), 127.7 (CH), 127.6 (C), 88.2 (CH), 85.7 (CH), 79.5 (CH), 77.1 (CH), 75.2 (CH<sub>2</sub>), 75.0 (CH<sub>2</sub>), 72.6 (CH), 61.9 (CH<sub>2</sub>), 21.1 (CH<sub>3</sub>); HRMS (ESI): *m/z* calcd for C<sub>27</sub>H<sub>30</sub>O<sub>5</sub>SNa ([M + Na]<sup>+</sup>): 489.1712, found: 489.1711.

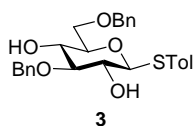

**4-Methylphenyl 3,6-di-O-benzyl-1-thio-β-D-glucopyranoside (3).** TMSOTf (5 μL, 26 μmol) was added to a solution of compound **1** (100 mg, 174 μmol) and benzaldehyde (19 μL, 190 μmol) in CH<sub>2</sub>Cl<sub>2</sub> (1 mL) with freshly dried 3 Å molecular sieves (120 mg) at -78 °C under N<sub>2</sub> atmosphere. The mixture was stirred at same temperature for 2 h. Et<sub>3</sub>SiH (31 μL, 190 μmol), benzaldehyde (18 μL, 183 μmol) and TMSOTf (5 μL, 26 μmol) were sequentially added to the reaction solution. After stirring for another 2.5 h at -78 °C, the reaction flask was moved to 0 °C, and Me<sub>2</sub>EtSiH (70 μL, 522 μmol) and CH<sub>3</sub>CN (3 mL) were added to the reaction mixture followed by addition of TMSOTf (6 μL, 35 μmol), and the solution was kept stirring for another 1 h at 0 °C. The reaction was slowly quenched with Et<sub>3</sub>N (2 mL) at 0 °C, the mixture was filtered through a pad of Celite, and the filtrate was concentrated under reduced pressure. Purification of the residue by flash column chromatography (ethyl acetate/hexanes = 1/2) supplied the 2,4-diol **3** (58mg, 72%) as a white solid. m.p. 95–97 °C; [α]<sup>28</sup><sub>D</sub> -35.8 (c 0.66 in CHCl<sub>3</sub>); IR (thin film): ν 3442, 2919, 1494, 1453, 1361, 1071, 809, 736, 698 cm<sup>-1</sup>; <sup>1</sup>H NMR (400 MHz, CDCl<sub>3</sub>): δ 7.45–7.42 (2 H, m, Ar-H), 7.38–7.25 (10 H, m, Ar-H), 7.06 (2 H, d, *J* 7.9, Ar-H), 4.93 (1 H, d, *J* 11.6, ArCH<sub>2</sub>), 4.79 (1 H, d, *J* 11.6, ArCH<sub>2</sub>), 4.59 (1 H, d, *J* 12.0, ArCH<sub>2</sub>), 4.55 (1 H, d, *J* 12.0, ArCH<sub>2</sub>), 4.45 (1 H, d, *J* 9.3, 1-H), 3.78–3.75 (2 H, m, 6-H<sub>a</sub>, 6-H<sub>b</sub>), 3.60–3.55 (1 H, m, 2-H), 3.51–3.38 (3 H, m, 3-H, 4-H, 5-H), 2.69 (1 H, d, *J* 2.2, OH), 2.52 (1 H, d, *J* 1.6,

OH), 2.33 (3 H, s, CH<sub>3</sub>); <sup>13</sup>C NMR (100 MHz, CDCl<sub>3</sub>): δ 138.44 (C), 138.41 (C), 137.9 (C), 133.5 (CH), 129.7 (CH), 128.6 (CH), 128.4 (CH), 128.0 (CH), 127.9 (CH), 127.7 (CH), 127.6 (CH), 80.4 (CH), 85.1 (CH), 78.5 (CH), 74.8 (CH<sub>2</sub>), 73.6 (CH<sub>2</sub>), 72.1 (CH), 71.1 (CH), 70.2 (C), 21.1 (CH<sub>3</sub>); HRMS (ESI): *m/z* calcd for C<sub>27</sub>H<sub>30</sub>O<sub>5</sub>SNa ([M + Na]<sup>+</sup>) 489.1712, found 489.1711.

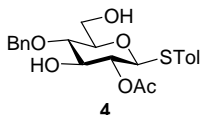

**4-Methylphenyl 2-O-acetyl-4-O-benzyl-1-thio-β-D-glucopyranoside (4).** A solution of compound **1** (100 mg, 174 μmol) and benzaldehyde (19 μL, 190 μmol) in CH<sub>2</sub>Cl<sub>2</sub> (1 mL) with freshly dried 3 Å molecular sieves (120 mg) was stirred at -78 °C under N<sub>2</sub> atmosphere. TMSOTf (5 μL, 26 μmol) was added to the solution, and the mixture was kept stirring at the same temperature for 2 h. Et<sub>3</sub>SiH (31 μL, 191 μmol), 2-NaphCHO (29 mg, 183 μmol) and TMSOTf (5 μL, 26 μmol) were consecutively added to the reaction solution. The resultant mixture was stirred for another 3 h. Ac<sub>2</sub>O (25 μL, 261 μmol) and TMSOTf (5 μL, 26 μmol) were consecutively added to the solution. The reaction flask was moved to 0 °C, and the mixture was stirred for 1 h. BH<sub>3</sub>·THF (1 M solution in THF, 0.52 mL, 0.52 mmol) was added to the reaction mixture followed by addition of TMSOTf (16 μL, 87 μmol). The solution was kept stirring for another 5 h at 0 °C. H<sub>2</sub>O (5 mL) was slowly added to the solution, the whole mixture was vigorously stirred for 5 min, and the aqueous layer was removed from the reaction bottle by using a pipette. DDQ (119 mg, 522 μmol) was then added to the solution. The mixture was stirred at room temperature for another 3 h. The reaction mixture was quenched by saturated NaHCO<sub>3(aq)</sub> (5 mL) and 10% Na<sub>2</sub>S<sub>2</sub>O<sub>3(aq)</sub> (5 mL), followed by filtration through a pad of Celite. The desired material was extracted with ethyl acetate, and the combined organic layer was

washed with brine, dried over anhydrous  $\text{MgSO}_4$ , filtered and concentrated under reduced pressure. Purification of this residue via flash column chromatography (ethyl acetate/hexanes = 1/2) furnished the desired 3,6-diol **4** (30 mg, 41%) as a white solid. m.p. 106–111 °C;  $[\alpha]_{\text{D}}^{28} -20$  (*c* 0.4 in  $\text{CHCl}_3$ ); IR (thin film):  $\nu$  3438, 2922, 1749, 1493, 1371, 1231, 1043, 752  $\text{cm}^{-1}$ ;  $^1\text{H}$  NMR (400 MHz,  $\text{CDCl}_3$ ):  $\delta$  7.35–7.24 (7 H, m, Ar-H), 7.10 (2 H, d, *J* 8.4, Ar-H), 4.79 (1 H, d, *J* 11.3, ArCH<sub>2</sub>), 4.77 (1 H, t, *J* 9.6, 2-H), 4.69 (1 H, d, *J* 11.3, ArCH<sub>2</sub>), 4.58 (1 H, d, *J* 9.6, 1-H), 3.88 (1 H, d, *J* 11.8, 6-H<sub>a</sub>), 3.78–3.69 (2 H, m, 3-H, 6-H<sub>b</sub>), 3.47 (1 H, t, *J* 9.6, 4-H), 3.36 (1 H, ddd, *J* 9.6, 4.4, 2.6, 5-H), 2.66 (1 H, s, 3-OH), 2.31 (3 H, s, CH<sub>3</sub>), 2.14 (3 H, s, CH<sub>3</sub>), 1.83 (1 H, s, 6-OH);  $^{13}\text{C}$  NMR (100 MHz,  $\text{CDCl}_3$ ):  $\delta$  170.6 (C), 138.4 (C), 137.8 (C), 133.0 (CH), 129.8 (CH), 128.6 (CH), 128.4 (C), 128.1 (CH), 85.8 (CH), 79.2 (CH), 77.6 (CH), 76.9 (CH), 74.9 (CH<sub>2</sub>), 72.6 (CH), 61.9 (CH<sub>2</sub>), 21.1 (CH<sub>3</sub>), 21.0 (CH<sub>3</sub>); HRMS (ESI): *m/z* calcd for  $\text{C}_{22}\text{H}_{26}\text{O}_6\text{SNa}$  ( $[\text{M} + \text{Na}]^+$ ): 441.1348, found: 441.1342.

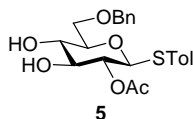

**4-Methylphenyl 2-O-acetyl-6-O-benzyl-1-thio- $\beta$ -D-glucopyranoside (5).** TMSOTf (5  $\mu\text{L}$ , 26  $\mu\text{mol}$ ) was added to a solution of compound **1** (100 mg, 174  $\mu\text{mol}$ ), benzaldehyde (19  $\mu\text{L}$ , 190  $\mu\text{mol}$ ) in  $\text{CH}_2\text{Cl}_2$  (1 mL) with freshly dried 3 Å molecular sieves (120 mg) at  $-78$  °C under  $\text{N}_2$  atmosphere. The mixture was kept stirring at the same temperature for 2 h.  $\text{Et}_3\text{SiH}$  (31  $\mu\text{L}$ , 190  $\mu\text{mol}$ ), 2-NaphCHO (29 mg, 183  $\mu\text{mol}$ ) and TMSOTf (5  $\mu\text{L}$ , 26  $\mu\text{mol}$ ) were consecutively added to the reaction solution and the mixture was stirred at  $-78$  °C for another 3 h.  $\text{Ac}_2\text{O}$  (18  $\mu\text{L}$ , 261  $\mu\text{mol}$ ) and TMSOTf (5  $\mu\text{L}$ , 26  $\mu\text{mol}$ ) were consecutively added to the solution, the reaction flask

was moved to 0 °C, and the mixture was stirred at the same temperature 1 h. Me<sub>2</sub>EtSiH (46 μL, 0.348 mmol) and CH<sub>3</sub>CN (3 mL) were added to the reaction mixture followed by TMSOTf (6 μL, 35 μmol), and the solution was kept stirring for another 1 h at 0 °C. DDQ (119 mg, 522 μmol) and H<sub>2</sub>O (0.1 mL) were added to the solution, and the mixture was stirred at room temperature for 3 h. The reaction mixture was quenched by saturated NaHCO<sub>3(aq)</sub> (5 mL) and 10% Na<sub>2</sub>S<sub>2</sub>O<sub>3(aq)</sub> (5 mL), then filtered through a pad of Celite. The desired material was extracted with ethyl acetate and the combined organic layer was washed with brine, dried over anhydrous MgSO<sub>4</sub>, filtered and concentrated under reduced pressure. Purification of the residue via flash column chromatography (ethyl acetate/hexanes = 1/2) furnished the 3,4-diol **5** (34 mg, 47%) as a white solid. m.p. 155–157 °C; [α]<sub>D</sub><sup>28</sup> +40.7 (c 0.36 in CHCl<sub>3</sub>); IR (thin film): ν 3491, 2920, 2872, 1723, 1495, 1375, 1268, 1077, 1049, 743, 695 cm<sup>-1</sup>; <sup>1</sup>H NMR (400 MHz, CDCl<sub>3</sub>): δ 7.38–7.26 (7 H, m, Ar-H), 7.04 (2 H, d, *J* 8.3, Ar-H), 4.75 (1 H, t, *J* 9.2, 2-H), 4.57 (1 H, d, *J* 11.8, ArCH<sub>2</sub>), 4.56 (1 H, d, *J* 9.2, 1-H), 4.53 (1 H, d, *J* 11.8, ArCH<sub>2</sub>), 3.76 (2 H, d, *J* 4.5, 6-H × 2), 3.59 (1 H, t, *J* 9.2, 3-H), 3.53 (1 H, t, *J* 9.2, 4-H), 3.48–3.43 (1 H, m, 5-H), 3.26 (1 H, br s, OH), 3.00 (1 H, br s, OH), 2.29 (3 H, s, CH<sub>3</sub>), 2.14 (3 H, s, CH<sub>3</sub>); <sup>13</sup>C NMR (100 MHz, CDCl<sub>3</sub>): δ 170.7 (C), 138.3 (C), 137.7 (C), 133.2 (CH), 129.6 (CH), 128.4 (CH), 127.8 (C), 127.7 (CH), 85.9 (CH), 78.1 (CH), 76.7 (CH), 73.7 (CH<sub>2</sub>), 72.2 (CH), 72.0 (CH), 70.1 (CH<sub>2</sub>), 21.1 (CH<sub>3</sub>), 21.0 (CH<sub>3</sub>); HRMS (ESI): *m/z* calcd for C<sub>22</sub>H<sub>26</sub>O<sub>6</sub>SNa ([M + Na]<sup>+</sup>): 441.1348, found: 441.1341.

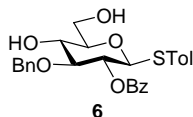

**4-Methylphenyl 2-O-benzoyl-3-O-benzyl-1-thio-β-D-glucopyranoside (6).** TMSOTf (6.2 μL, 34 μmol) was added to solution of compound **1** (106 mg, 185 μmol), benzaldehyde (19 μL,

190  $\mu\text{mol}$ ) in  $\text{CH}_2\text{Cl}_2$  (1.6 mL) with freshly dried 3 Å molecular sieves (160 mg) at 0 °C under  $\text{N}_2$  atmosphere. The mixture was kept stirring at the same temperature for 2 h. After cooling to  $-78$  °C,  $\text{Et}_3\text{SiH}$  (33  $\mu\text{L}$ , 207  $\mu\text{mol}$ ), benzaldehyde (19  $\mu\text{L}$ , 190  $\mu\text{mol}$ ) and TMSOTf (3.4  $\mu\text{L}$ , 19  $\mu\text{mol}$ ) were sequentially added, and the resulting mixture was stirred at  $-78$  °C for another 3 h. The reaction flask was moved to 0 °C, and  $\text{Bz}_2\text{O}$  (130 mg, 0.56 mmol), and TMSOTf (3.4  $\mu\text{L}$ , 19  $\mu\text{mol}$ ) were then added. The reaction flask was gradually warmed up to room temperature and the mixture was stirred at the same temperature for 18 h. 70%  $\text{TFA}_{(\text{aq})}$  (3 mL) was added to the resulting solution and the mixture was continuously stirred at room temperature for another 1 h. The reaction was quenched by saturated  $\text{NaHCO}_{3(\text{aq})}$ , and the desired material was extracted with ethyl acetate. The combined organic layer was washed with brine, dried over  $\text{MgSO}_4$ , filtered and concentrated under reduced pressure. The residue was purified by flash column chromatography (ethyl acetate/hexanes = 1/1) to afford the 4,6-diol **6** (67 mg, 75%). mp 117–118 °C;  $[\alpha]_{\text{D}}^{22} +12.9$  ( $c$  1.0 in  $\text{CHCl}_3$ ); IR (thin film):  $\nu$  3630, 3100, 1724, 1267, 1254, 1094, 1070  $\text{cm}^{-1}$ ;  $^1\text{H}$  NMR (400 MHz,  $\text{CDCl}_3$ ):  $\delta$  8.07–8.05 (2 H, m, Ar-H), 7.61–7.57 (1 H, m, Ar-H), 7.49–7.44 (2 H, m, Ar-H), 7.30 (2 H, d,  $J$  8.1, Ar-H), 7.21–7.15 (5 H, m, Ar-H), 7.06 (2 H, d,  $J$  7.9, Ar-H), 5.20 (1 H, dd,  $J$  10.0, 9.0, 2-H), 4.75 (1 H, d,  $J$  10.0, 1-H), 4.70 (1 H, d,  $J$  11.4, Ar $\text{CH}_2$ ), 4.55 (1 H, d,  $J$  11.4, Ar $\text{CH}_2$ ), 3.90 (1 H, ddd,  $J$  12.0, 6.6, 3.4, 6- $\text{H}_a$ ), 3.81–3.75 (1 H, m, 6- $\text{H}_b$ ), 3.71–3.66 (2 H, m, 3-H, 4-H), 3.46–3.42 (1 H, m, 5-H), 2.37 (1 H, d,  $J$  2.2, 4-OH), 2.30 (3 H, s, Ar $\text{CH}_3$ ), 2.11 (1 H, t,  $J$  6.6, 6-OH);  $^{13}\text{C}$  NMR (100 MHz,  $\text{CDCl}_3$ ):  $\delta$  165.2 (C), 138.4 (C), 137.6 (C), 133.3 (CH), 133.1 (CH), 129.9 (CH), 129.7 (CH), 128.6 (C), 128.51 (CH), 128.49 (CH), 128.0 (CH), 86.6 (CH), 83.9 (CH), 79.4 (CH), 74.8 ( $\text{CH}_2$ ), 72.4 (CH), 70.3 (CH), 62.6 ( $\text{CH}_2$ ), 21.1 ( $\text{CH}_3$ ); HRMS (FAB):  $m/z$  calcd for  $\text{C}_{27}\text{H}_{29}\text{O}_6\text{S}$  ( $[\text{M} + \text{H}]^+$ ): 481.1685, found: 481.1696.

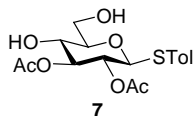

**4-Methylphenyl 2,3-di-O-acetyl-1-thio- $\beta$ -D-glucopyranoside (7).** TMSOTf (5  $\mu$ L, 26  $\mu$ mol) was added to a solution of compound **1** (100 mg, 174  $\mu$ mol) and benzaldehyde (19  $\mu$ L, 190  $\mu$ mol) in  $\text{CH}_2\text{Cl}_2$  (1 mL) with freshly dried 3 Å molecular sieves (120 mg) at 0 °C under  $\text{N}_2$  atmosphere. The mixture was stirred at same temperature for 2 h.  $\text{Ac}_2\text{O}$  (40  $\mu$ L, 418  $\mu$ mol) and TMSOTf (10  $\mu$ L, 52  $\mu$ mol) were consecutively added to the solution, and the mixture was stirred at the same temperature. After stirring for 1 h, 70%  $\text{TFA}_{(\text{aq})}$  (1 mL) was added to the resulting solution, ice-bath was removed, and the reaction was continuously stirred at room temperature for another 1 h. The reaction was quenched by saturated  $\text{NaHCO}_{3(\text{aq})}$  (5 mL), and the desired material was extracted with ethyl acetate. The combined organic layer was washed with brine, dried over  $\text{MgSO}_4$ , filtered and concentrated under reduced pressure. Purification of the residue by flash column chromatography (ethyl acetate/hexanes = 2/1) to acquire the 2,3-diacetate **7** (45 mg, 70%) as a colorless oil.  $[\alpha]_{\text{D}}^{28} -28.4$  ( $c$  0.88,  $\text{CHCl}_3$ ); IR (thin film):  $\nu$  3441, 2930, 1752, 1374, 1044, 900, 808, 759  $\text{cm}^{-1}$ ;  $^1\text{H}$  NMR (400 MHz,  $\text{CDCl}_3$ ):  $\delta$  7.32 (2 H, d,  $J$  8.1, Ar-H), 7.08 (2 H, d,  $J$  8.1, Ar-H), 5.03 (1 H, t,  $J$  9.6, 2-H), 4.84 (1 H, t,  $J$  9.6, 3-H), 4.65 (1 H, d,  $J$  9.6, 1-H), 3.87 (1 H, dd,  $J$  12.1, 3.3, 6- $\text{H}_a$ ), 3.77 (1 H, dd,  $J$  12.1, 4.3, 6- $\text{H}_b$ ), 3.66 (1 H, t,  $J$  9.6, 4-H), 3.6 (1 H, br s, OH), 3.38 (1 H, ddd,  $J$  9.6, 4.3, 3.3, 5-H), 2.69 (1 H, br s, OH), 2.3 (3 H, s,  $\text{CH}_3$ ), 2.05 (3 H, s,  $\text{CH}_3$ ), 2.02 (3 H, s,  $\text{CH}_3$ );  $^{13}\text{C}$  NMR (100 MHz,  $\text{CDCl}_3$ ):  $\delta$  171.3 (C), 169.6 (C), 133.1 (CH), 129.8 (CH), 128.1 (C), 85.9 (CH), 79.6 (CH), 76.8 ( $\text{CH}_2$ ), 70.15 (CH), 68.7 (CH), 61.9 ( $\text{CH}_2$ ), 21.1 ( $\text{CH}_3$ ), 20.8 ( $\text{CH}_3$ ), 20.8 ( $\text{CH}_3$ ); HRMS (ESI):  $m/z$  calcd for  $\text{C}_{22}\text{H}_{26}\text{O}_6\text{SNa}$  ( $[\text{M} + \text{Na}]^+$ ): 393.0984, found: 393.0992.



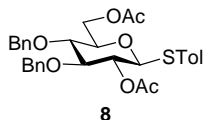

**4-Methylphenyl 2,6-di-O-acetyl-3,4-di-O-benzyl-1-thio- $\beta$ -D-glucopyranoside (8).**

TMSOTf (5  $\mu$ L, 26  $\mu$ mol) was added to a solution of compound **1** (100 mg, 174  $\mu$ mol) and benzaldehyde (19  $\mu$ L, 190  $\mu$ mol) in  $\text{CH}_2\text{Cl}_2$  (1 mL) with freshly dried 3 Å molecular sieves (160 mg) at  $-78$  °C under  $\text{N}_2$  atmosphere. The mixture was stirred at same temperature for 2 h.  $\text{Et}_3\text{SiH}$  (31  $\mu$ L, 190  $\mu$ mol), benzaldehyde (18  $\mu$ L, 183  $\mu$ mol) and TMSOTf (5  $\mu$ L, 26  $\mu$ mol) were sequentially added to the reaction solution. After stirring at  $-78$  °C for another 2.5 h, the reaction flask was moved to 0 °C.  $\text{BH}_3\cdot\text{THF}$  (1 M solution in THF, 0.87 mL, 0.87 mmol) was added to the reaction mixture followed by TMSOTf (16  $\mu$ L, 87  $\mu$ mol), and the solution was kept stirring for another 5 h at 0 °C. Borane was slowly quenched with MeOH (70  $\mu$ L, 1.74 mmol) at 0 °C, followed by further stirring for 30 min.  $\text{Et}_3\text{N}$  (1.4 mL, 8.7 mmol),  $\text{Ac}_2\text{O}$  (0.66 mL, 6.96 mmol) and DMAP (2 mg, 17.4  $\mu$ mol) were added to the reaction mixture and the solution was stirred at room temperature for another 12 h. The whole mixture was filtered through a pad of Celite.  $\text{H}_2\text{O}$  was added to the filtrate followed by extraction with ethyl acetate. The combined organic layer was washed with brine, dried over anhydrous  $\text{MgSO}_4$ , filtered and concentrated under reduced pressure to give a residue, which was purified by flash column chromatography (ethyl acetate/hexanes = 1/4) to afford the diacetate **8** (74 mg, 77%) as a white solid. m.p. 132–136 °C;  $[\alpha]_D^{28} +10.9$  (*c* 0.76 in  $\text{CHCl}_3$ ); IR (thin film):  $\nu$  2901, 1742, 1453, 1358, 1238, 1126, 1043, 808, 743, 696  $\text{cm}^{-1}$ ;  $^1\text{H}$  NMR (600 MHz,  $\text{CDCl}_3$ ):  $\delta$  7.36 (2 h, d, *J* 8.1, Ar-H), 7.34–7.24 (8 H, m, Ar-H), 7.23–7.22 (2 H, m, Ar-H), 7.07 (2 H, d, *J* 7.8, Ar-H), 4.94 (1 H, t, *J* 9.8, 2-H), 4.80–4.76 (2 H, m,  $\text{ArCH}_2$ ), 4.66 (1 H, d, *J* 11.3,  $\text{ArCH}_2$ ), 4.54 (1 H, d, *J* 11.6,  $\text{ArCH}_2$ ), 4.51 (1 H, d, *J* 9.8, 1-H), 4.38 (1 H, dd, *J* 11.9, 1.8, 6- $\text{H}_a$ ), 4.15 (1 H, dd, *J* 11.9, 4.7, 6- $\text{H}_b$ ), 3.67 (1 H, t, *J*

8.7, 3-H), 3.56–3.52 (2 H, m, 4-H, 5-H), 2.31 (3 H, s, CH<sub>3</sub>), 2.02 (3 H, s, CH<sub>3</sub>), 2.00 (3 H, s, CH<sub>3</sub>); <sup>13</sup>C NMR (150 MHz, CDCl<sub>3</sub>): δ 170.5 (C), 169.4 (C), 138.1 (C), 137.8 (C), 137.4 (C), 133.18 (CH), 129.4 (CH), 128.5 (C), 128.4 (CH), 128.3 (CH), 127.9 (CH), 128.0 (CH), 127.9 (CH), 127.8(CH), 86.0 (CH), 84.4 (CH), 77.3 (CH), 76.9 (CH), 75.3 (CH<sub>2</sub>), 75.0 (CH<sub>2</sub>), 71.6 (CH), 62.8 (CH<sub>2</sub>), 21.0 (CH<sub>3</sub>), 20.9 (CH<sub>3</sub>), 20.7 (CH<sub>3</sub>); HRMS (ESI): *m/z* calcd for C<sub>31</sub>H<sub>34</sub>O<sub>7</sub>SNa ([M + Na]<sup>+</sup>): 573.1923, found: 573.1924.

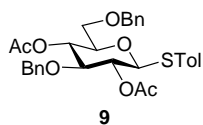

**4-Methylphenyl 2,4-di-O-acetyl-3,6-di-O-benzyl-1-thio-β-D-glucopyranoside (9).**

TMSOTf (5 μL, 26 μmol) was added to a solution of compound **1** (100 mg, 174 μmol) and benzaldehyde (19 μL, 190 μmol) in CH<sub>2</sub>Cl<sub>2</sub> (1 mL) with freshly dried 3 Å molecular sieves (150 mg) at –78 °C under N<sub>2</sub> atmosphere. The mixture was stirred for 2 h at the same temperature. Et<sub>3</sub>SiH (31 μL, 190 μmol), benzaldehyde (18 μL, 183 μmol) and TMSOTf (5 μL, 26 μmol) were sequentially added to the reaction solution. After stirring for another 2.5 h at –78 °C, the reaction flask was moved to 0 °C. Me<sub>2</sub>EtSiH (69 μL, 522 μmol) and CH<sub>3</sub>CN (3 mL) were added to the reaction mixture followed by addition of TMSOTf (5 μL, 26 μmol). The solution was kept stirring for another 1 h at 0 °C. Then, Ac<sub>2</sub>O (75 μL, 783 μmol) and TMSOTf (15 μL, 78 μmol) were consecutively added to the mixture, which stirred further for 12 h at the same temperature. The reaction was slowly quenched by Et<sub>3</sub>N (2 mL) at 0 °C, the mixture was filtered through a pad of Celite, and the filtrate was concentrated under reduced pressure. The residue was purified by flash column chromatography (ethyl acetate/hexanes = 1/4) to obtain the desired fully protected thioglucoside **9** (40 mg, 42%) as a white solid. m.p. 110–112 °C; [α]<sub>D</sub><sup>28</sup> –12.2 (c

0.76 in CHCl<sub>3</sub>); IR (thin film):  $\nu$  2868, 1749, 1495, 1372, 1220, 1061, 808, 737, 698 cm<sup>-1</sup>; <sup>1</sup>H NMR (400 MHz, CDCl<sub>3</sub>):  $\delta$  7.40 (2 H, d, *J* 8.1, Ar-H), 7.37–7.20 (10 H, m, Ar-H), 7.03 (2 H, d, *J* 8.1, Ar-H), 5.04–5.00 (2 H, m, 2-H, 4-H), 4.62–4.55 (3 H, m, 1-H, ArCH<sub>2</sub>), 4.53–4.47 (2 H, m, ArCH<sub>2</sub>), 3.70 (1 H, t, *J* 9.2, 3-H), 3.63–3.54 (3 H, m, 5-H, 6-H × 2), 2.29 (3 H, s, CH<sub>3</sub>), 2.04 (3 H, s, CH<sub>3</sub>), 1.88 (3 H, s, CH<sub>3</sub>); <sup>13</sup>C NMR (100 MHz, CDCl<sub>3</sub>):  $\delta$  169.4 (C), 169.2 (C), 138.1 (C), 137.9 (C), 137.8 (C), 132.9 (CH), 129.6 (CH), 128.7 (C), 128.3 (CH), 128.2 (CH), 127.7 (CH), 127.6 (CH), 86.3 (CH), 81.6 (CH), 77.8 (CH), 73.9 (CH<sub>2</sub>), 73.6 (CH<sub>2</sub>), 71.4 (CH), 70.6 (CH), 69.7 (CH<sub>2</sub>), 21.0 (CH<sub>3</sub>), 20.9 (CH<sub>3</sub>), 20.7 (CH<sub>3</sub>); HRMS (ESI): *m/z* calcd for C<sub>31</sub>H<sub>34</sub>O<sub>7</sub>SNa ([M + Na]<sup>+</sup>): 573.1923, found: 573.1926.

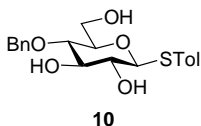

**4-Methylphenyl 4-O-benzyl-1-thio-β-D-glucopyranoside (10).** TMSOTf (5 μL, 26 μmol) was added to a mixture of compound **1** (100 mg, 174 μmol) and benzaldehyde (19 μL, 190 μmol) in CH<sub>2</sub>Cl<sub>2</sub> (1 mL) with freshly dried 3 Å molecular sieves (120 mg) at 0 °C under N<sub>2</sub> atmosphere. After 2 h of stirring at 0 °C, BH<sub>3</sub>·THF (1 M solution in THF, 0.87 mL, 0.87 mmol) was added to the reaction mixture followed by addition of TMSOTf (16 μL, 87 μmol). The solution was kept stirring for another 5 h at 0 °C. The reaction was slowly quenched with MeOH (5 mL) and Et<sub>3</sub>N (1 mL) at 0 °C, the mixture was filtered through a pad of Celite, and the filtrate was coevaporated with MeOH under reduced pressure. Ethyl acetate and H<sub>2</sub>O were added to the residue followed by extraction with ethyl acetate. The combined organic layer was washed with brine, dried over anhydrous MgSO<sub>4</sub>, filtered and concentrated under reduced pressure. Purification by flash column chromatography (CHCl<sub>3</sub>/MeOH = 20/1) provided the 2,3,6-triol **10**

(53 mg, 81%) as a white solid. m.p. 113–116 °C;  $[\alpha]_D^{28} -41.7$  (*c* 0.26 in CHCl<sub>3</sub>); IR (thin film):  $\nu$  3419, 1493, 1028, 807, 751, 699 cm<sup>-1</sup>; <sup>1</sup>H NMR (400 MHz, CDCl<sub>3</sub>):  $\delta$  7.38 (2 H, d, *J* 8, Ar-H), 7.31–7.23 (5 H, m, Ar-H), 7.07 (2 H, d, *J* 8, Ar-H), 4.83 (1 H, d, *J* 11.3, ArCH<sub>2</sub>), 4.65 (1 H, d, *J* 11.3, ArCH<sub>2</sub>), 4.47 (1 H, d, *J* 9.7, 1-H), 3.86 (1 H, d, *J* 11.8, 6-H<sub>a</sub>), 3.71–3.67 (2 H, m, 2-H, 6-H<sub>b</sub>), 3.48 (1 H, br s, OH), 3.44–3.30 (4 H, m, 3-H, 4-H, 5-H, OH), 2.41 (1 H, d, *J* 1.9, 6-OH), 2.30 (3 H, s, CH<sub>3</sub>); <sup>13</sup>C NMR (100 MHz, CDCl<sub>3</sub>):  $\delta$  138.4 (C), 138.0 (C), 133.0 (CH), 129.8 (CH), 128.5 (CH), 127.9 (CH), 127.8 (CH), 87.9 (CH), 79.2 (CH), 78 (CH), 76.9 (CH), 74.7 (CH<sub>2</sub>), 72.3 (CH), 62.0 (CH<sub>2</sub>), 21.1 (CH<sub>3</sub>); HRMS (ESI): *m/z* calcd for C<sub>20</sub>H<sub>24</sub>O<sub>5</sub>SNa ([M + Na]<sup>+</sup>): 399.1242, found: 399.1246.

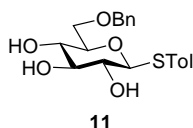

**4-Methylphenyl 6-O-benzyl-1-thio-β-D-glucopyranoside (11).** TMSOTf (5 μL, 26 μmol) was added to a solution of compound **1** (100 mg, 174 μmol) and benzaldehyde (19 μL, 190 μmol) in CH<sub>2</sub>Cl<sub>2</sub> (1 mL) with freshly dried 3 Å molecular sieves (120 mg) at 0 °C under N<sub>2</sub> atmosphere. The mixture was stirred at same temperature for 2 h; then moved to 0 °C afterwards. Me<sub>2</sub>EtSiH (46 μL, 0.522 mmol) and CH<sub>3</sub>CN (3 mL) were added to the reaction mixture followed by addition of TMSOTf (6 μL, 35 μmol), and the solution was kept stirring for 1 h at 0 °C. TBAF (1.74 mL, 1.74 mmol) was added to the mixture, the reaction flask was gradually warmed up to room temperature, and the solution was kept stirring overnight. The whole mixture was filtered through a pad of Celite, and the filtrate was mixed with saturated NaHCO<sub>3(aq)</sub> (10 mL). The desired material was extracted with ethyl acetate, and the combined organic layer was washed with brine, dried over anhydrous MgSO<sub>4</sub>, filtered and concentrated under reduced pressure. The

residue was purified by flash column chromatography (ethyl acetate/hexanes = 2/1) to obtain the 2,3,4-triol **11** (32 mg, 51%) as a white solid. m.p. 79–81 °C;  $[\alpha]_D^{28} -47.3$  (*c* 0.4 in CHCl<sub>3</sub>); IR (thin film):  $\nu$  3375, 2919, 1493, 1453, 1366, 1045, 808, 733, 696 cm<sup>-1</sup>; <sup>1</sup>H NMR (400 MHz, CDCl<sub>3</sub>):  $\delta$  7.38 (2 H, d, *J* 8.1, Ar-H), 7.30–7.21 (5 H, m, Ar-H), 6.97 (2 H, d, *J* 8.1, Ar-H), 4.87 (1 H, br s, OH), 4.35–4.43 (3 H, m, 1-H, ArCH<sub>2</sub>), 4.28 (1 H, br s, OH), 4.12 (1 H, br s, OH), 3.72 (1 H, dd, *J* 10.9, 2.8, 6-H<sub>a</sub>), 3.64 (1 H, dd, *J* 10.9, 4.9, 6-H<sub>b</sub>), 3.53–3.38 (3 H, m, 2-H, 3-H, 5-H), 3.3 (1 H, t, *J* 9.1, 4-H), 2.23 (3 H, s, CH<sub>3</sub>); <sup>13</sup>C NMR (100 MHz, CDCl<sub>3</sub>):  $\delta$  138.0 (C), 137.9 (C), 133.0 (CH), 129.7 (CH), 128.5 (CH), 128.4 (CH), 127.8 (CH), 127.67 (CH), 87.9 (CH), 78.7 (CH), 77.9 (CH), 73.6 (CH<sub>2</sub>), 71.9 (CH), 70.7(CH), 69.9 (CH<sub>2</sub>), 21.1 (CH<sub>3</sub>); HRMS (ESI): *m/z* calcd for C<sub>20</sub>H<sub>24</sub>O<sub>5</sub>SNa ([M + Na]<sup>+</sup>): 399.1242, found: 399.1248.

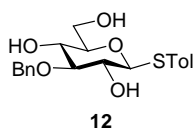

**4-Methylphenyl 3-O-benzyl-1-thio-β-D-glucopyranoside (12).** TMSOTf (5 μL, 26 μmol) was added to a solution of compound **1** (100 mg, 174 μmol) and benzaldehyde (19 μL, 190 μmol) in CH<sub>2</sub>Cl<sub>2</sub> (1 mL) with freshly dried 3 Å molecular sieves (120 mg) at -78 °C under N<sub>2</sub> atmosphere. The mixture was stirred for 2 h at the same temperature. Et<sub>3</sub>SiH (31 μL, 190 μmol), benzaldehyde (18 μL, 183 μmol) and TMSOTf (5 μL, 26 μmol) were successively added to the solution. After stirring for another 2.5 h at -78 °C, the reaction flask was moved to 0 °C. A 70% aqueous TFA solution (1 mL) was added to the resultant mixture. The reaction was continuously stirred at room temperature for 1 h. The reaction was quenched by saturated NaHCO<sub>3(aq)</sub>, followed by extraction with ethyl acetate. The combined organic layer was washed with brine, dried over MgSO<sub>4</sub>, filtered and concentrated under reduced pressure. The residue was purified

by flash column chromatography (ethyl acetate/hexanes = 1/1) to afford the 2,4,6-triol **12** (40 mg, 62%) as a white solid. m.p. 136–140 °C;  $[\alpha]_D^{28} -72.4$  (*c* 0.6 in CHCl<sub>3</sub>); IR (thin film):  $\nu$  3325, 1493, 1367, 1121, 1035, 808, 751, 701 cm<sup>-1</sup>; <sup>1</sup>H NMR (400 MHz, CDCl<sub>3</sub>):  $\delta$  7.41–7.37 (2 H, m, Ar-H), 7.35–7.25 (5 H, m, Ar-H), 7.10 (2 H, d, *J* 7.9, Ar-H), 4.97 (1 H, d, *J* 11.6, ArCH<sub>2</sub>), 4.74 (1 H, d, *J* 11.6, ArCH<sub>2</sub>), 4.47 (1 H, d, *J* 9.3, 1-H), 3.87–3.84 (1 H, m, 6-H<sub>a</sub>), 3.76–3.70 (1 H, m, 6-H<sub>b</sub>), 3.53–3.48 (1 H, m, 2-H), 3.44–3.32 (3 H, m, 3-H, 4-H, 5-H), 2.67 (1 H, d, *J* 2.6, OH), 2.61 (1 H, d, *J* 1.6, OH), 2.32 (3 H, s, CH<sub>3</sub>), 2.30–2.27 (1 H, m, OH); <sup>13</sup>C NMR (100 MHz, CDCl<sub>3</sub>):  $\delta$  138.7 (C), 138.4 (C), 133.3 (CH), 129.9 (CH), 128.6 (CH), 128.0 (CH), 127.5 (C), 88.7 (CH), 85.1 (CH), 79.4 (CH), 79.4 (CH), 74.8 (CH<sub>2</sub>), 72.5 (CH), 69.9 (CH), 62.6 (CH<sub>2</sub>), 21.1 (CH<sub>3</sub>); HRMS (ESI): *m/z* calcd for C<sub>20</sub>H<sub>24</sub>O<sub>5</sub>SNa ([M + Na]<sup>+</sup>): 399.1242, found: 399.1235.

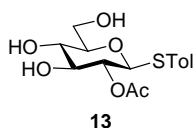

**4-Methylphenyl 2-O-acetyl-1-thio- $\beta$ -D-glucopyranoside (13).** TMSOTf (5  $\mu$ L, 26  $\mu$ mol) was added to a solution of compound **1** (100 mg, 174  $\mu$ mol) and benzaldehyde (19  $\mu$ L, 190  $\mu$ mol) CH<sub>2</sub>Cl<sub>2</sub> (1 mL) with freshly dried 3 Å molecular sieves (120 mg) at -78 °C under N<sub>2</sub> atmosphere. The mixture was kept stirring at the same temperature for 2 h. Et<sub>3</sub>SiH (31  $\mu$ L, 228  $\mu$ mol), 2-NaphCHO (29 mg, 183  $\mu$ mol) and TMSOTf (5  $\mu$ L, 26  $\mu$ mol) were consecutively added to the reaction solution. After stirring at -78 °C for 3 h, Ac<sub>2</sub>O (25  $\mu$ L, 261  $\mu$ mol) and TMSOTf (5  $\mu$ L, 26  $\mu$ mol) were consecutively added to the solution, the reaction flask was moved to 0 °C, and the mixture was stirred at the same temperature for 1 h. A 70% aqueous TFA (1 mL) was added to the resulting solution, the ice-bath was removed, and the reaction was continuously stirred at room temperature for another 1 h. The reaction was quenched by saturated NaHCO<sub>3(aq)</sub>,

followed by extraction with ethyl acetate. The combined organic layer was washed with brine, dried over MgSO<sub>4</sub>, filtered and concentrated under reduced pressure. Purification by flash column chromatography (CHCl<sub>3</sub>/MeOH = 15/1) gave the 3,4,6-triol product **13** (30 mg, 53%) as a white solid. m.p. 201–205 °C; [ $\alpha$ ]<sub>D</sub><sup>28</sup> –63.2 (*c* 0.3 in ethyl acetate); IR (thin film):  $\nu$  3510, 3234, 2923, 1721, 1456, 1263, 1040, 810, 720, 668 cm<sup>-1</sup>; <sup>1</sup>H NMR (400 MHz, CDCl<sub>3</sub>):  $\delta$  7.40–7.37 (2 H, m, Ar-H), 7.11 (2 H, d, *J* 7.9, Ar-H), 4.73–4.64 (2 H, m, 1-H, 2-H), 3.86 (1 H, dd, *J* 12.1, 2.1, 6-H<sub>a</sub>), 3.67 (1 H, dd, *J* 12.1, 5.4, 6-H<sub>b</sub>), 3.53 (1 H, t, *J* 8.6, 3-H), 3.38–3.29 (2 H, m, 4-H, 5-H), 2.30 (3 H, s, CH<sub>3</sub>), 2.10 (3 H, s, CH<sub>3</sub>); <sup>13</sup>C NMR (100 MHz, CDCl<sub>3</sub>):  $\delta$  171.8 (C), 139.0 (CH), 133.4 (CH), 133.1 (C), 130.6 (CH), 87.7 (CH), 82.2 (CH), 77.5 (CH), 74.0 (CH), 71.4 (CH), 62.8 (CH<sub>2</sub>), 21.1(CH<sub>3</sub>); HRMS (ESI): *m/z* calcd for C<sub>15</sub>H<sub>20</sub>O<sub>6</sub>SNa ([M + Na]<sup>+</sup>): 351.0878, found: 351.0876.

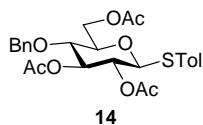

**4-Methylphenyl 2,3,6-tri-O-acetyl-4-O-benzyl-1-thio- $\beta$ -D-glucopyranoside (14).**

TMSOTf (5  $\mu$ L, 26  $\mu$ mol) was added to a solution of compound **1** (100 mg, 174  $\mu$ mol) and benzaldehyde (19  $\mu$ L, 190  $\mu$ mol) in CH<sub>2</sub>Cl<sub>2</sub> (1 mL) with freshly dried 3 Å molecular sieves (120 mg) at 0 °C under N<sub>2</sub> atmosphere. The mixture was stirred for 2 h at same temperature. BH<sub>3</sub>·THF (1 M solution in THF, 0.9 mL, 0.9 mmol) was added to the reaction mixture followed by addition of TMSOTf (16  $\mu$ L, 87  $\mu$ mol). After 5 h of stirring at 0 °C, BH<sub>3</sub> was slowly quenched by MeOH (70  $\mu$ L, 1.74 mmol) at 0 °C, and the mixture was stirred for 30 min. Et<sub>3</sub>N (3.6 mL, 26.1 mmol), Ac<sub>2</sub>O (1.6 mL, 17.4 mmol) and DMAP (2 mg, 17.4  $\mu$ mol) were added to the reaction mixture, followed by 12 h of stirring at room temperature. The whole mixture was

filtered through a pad of Celite. H<sub>2</sub>O was added to the filtrate and the desired material was extracted with ethyl acetate. The combined organic layer was washed with brine, dried over anhydrous MgSO<sub>4</sub>, filtered and concentrated under reduced pressure. Purification of the residue by flash column chromatography (ethyl acetate/hexanes = 1/3) supplied the triacetate **14** (67 mg, 77%) as a white solid. m.p. 95–98 °C;  $[\alpha]_D^{28}$  -26.9 (*c* 0.96 in CHCl<sub>3</sub>); IR (thin film):  $\nu$  2945, 1751, 1494, 1366, 1231, 1046, 809, 752, 700 cm<sup>-1</sup>; <sup>1</sup>H NMR (400 MHz, CDCl<sub>3</sub>):  $\delta$  7.34 (2 H, d, *J* 8.1, Ar-H), 7.31–7.19 (5 H, m, Ar-H), 7.07 (2 H, d, *J* 8.1, Ar-H), 5.23 (1 H, t, *J* 9.6, 2-H), 4.82 (1 H, t, *J* 9.6 Hz, 3-H), 4.59 (1 H, d, *J* 9.6, 1-H), 4.55 (1 H, d, *J* 11.3, ArCH<sub>2</sub>), 4.51 (1 H, d, *J* 11.3, ArCH<sub>2</sub>), 4.38 (1 H, d, *J* 11.9, 6-H<sub>a</sub>), 4.14 (1 H, dd, *J* 11.9, 3.4, 6-H<sub>b</sub>), 3.59–3.53 (2 H, m, 4-H, 5-H), 2.30 (3 H, s, CH<sub>3</sub>), 2.04 (3 H, s, CH<sub>3</sub>), 2.01 (3 H, s, CH<sub>3</sub>), 1.91 (3 H, s, CH<sub>3</sub>); <sup>13</sup>C NMR (100 MHz, CDCl<sub>3</sub>):  $\delta$  170.5 (C), 170.0 (C), 169.7 (C), 138.6 (C), 137.3 (C), 133.8 (CH), 129.7 (CH), 128.7 (CH), 128.2 (CH), 128.1 (CH), 127.9 (C), 85.6 (CH), 77.0 (CH), 76.3 (CH), 75.7 (CH), 74.8 (CH<sub>2</sub>), 70.6 (CH), 62.8 (CH<sub>2</sub>), 21.3 (CH<sub>3</sub>), 20.9 (CH<sub>3</sub> × 3); HRMS (ESI): *m/z* calcd for C<sub>26</sub>H<sub>30</sub>O<sub>8</sub>SNa ([M + Na]<sup>+</sup>): 525.1559, found: 525.1555.

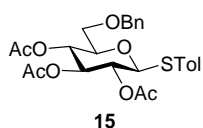

**4-Methylphenyl 2,3,4-tri-O-acetyl-6-O-benzyl-1-thio-β-D-glucopyranoside (15).**

TMSOTf (5  $\mu$ L, 26  $\mu$ mol) was added to a solution of compound **1** (100 mg, 174  $\mu$ mol) and benzaldehyde (19  $\mu$ L, 190  $\mu$ mol) in CH<sub>2</sub>Cl<sub>2</sub> (1 mL) with freshly dried 3 Å molecular sieves (120 mg) at 0 °C under N<sub>2</sub> atmosphere. The mixture was stirred at same temperature for 2 h, then Me<sub>2</sub>EtSiH (69  $\mu$ L, 0.522 mmol) and acetonitrile (3 mL) were added to the reaction mixture followed by addition of TMSOTf (5  $\mu$ L, 26  $\mu$ mol). After stirring for 1 h at 0 °C, Ac<sub>2</sub>O (66  $\mu$ L,



696  $\mu\text{mol}$ ) and TMSOTf (15  $\mu\text{L}$ , 78  $\mu\text{mol}$ ) were consecutively added to the solution. Stirring was continued at 0 °C for 12 h. The reaction was slowly quenched by Et<sub>3</sub>N (2 mL), the mixture was filtered through a pad of Celite, and the filtrate was concentrated under reduced pressure. Purification by flash column chromatography (ethyl acetate/hexanes = 1/3) furnished the triacetate **15** (41 mg, 47%) as a white solid. m.p. 92–95 °C;  $[\alpha]_{\text{D}}^{28}$  –8.8 (*c* 0.55 in CHCl<sub>3</sub>); IR (thin film):  $\nu$  2922, 1755, 1494, 1373, 1243, 1219, 1048, 912, 808, 699 cm<sup>-1</sup>; <sup>1</sup>H NMR (400 MHz, CDCl<sub>3</sub>):  $\delta$  7.39–7.27 (7 H, m, Ar-H), 7.04 (2 H, d, *J* 8.4, Ar-H), 5.18 (1 H, t, *J* 9.7, 2-H), 5.00 (1 H, t, *J* 9.7, 3-H), 4.92 (1 H, dd, *J* 9.9, 9.7, 4-H), 4.63 (1 H, d, *J* 9.7, 1-H), 4.52 (1 H, d, *J* 11.8 Hz, ArCH<sub>2</sub>), 4.47 (1 H, d, *J* 11.8, ArCH<sub>2</sub>), 3.69–3.64 (1 H, m, 5-H), 3.57 (2 H, m, 6-H × 2), 2.30 (3 H, s, CH<sub>3</sub>), 2.06 (3 H, s, CH<sub>3</sub>), 1.96 (3 H, s, CH<sub>3</sub>), 1.90 (3 H, s, CH<sub>3</sub>); <sup>13</sup>C NMR (100 MHz, CDCl<sub>3</sub>):  $\delta$  170.2 (C), 169.5 (C), 169.2 (C), 138.5 (C), 137.8 (C), 133.5 (CH), 129.7 (CH), 128.3 (CH), 127.8 (CH), 127.7 (CH), 85.8 (CH), 77.5 (CH), 74.2 (CH), 73.6 (CH), 70.1 (CH<sub>2</sub>), 69.1 (CH), 69.0 (CH<sub>2</sub>), 21.1 (CH<sub>3</sub>), 20.6 (CH<sub>3</sub> × 3); HRMS (ESI): *m/z* calcd for C<sub>26</sub>H<sub>30</sub>O<sub>8</sub>SNa ([M + Na]<sup>+</sup>): 525.1559, found: 525.1563.

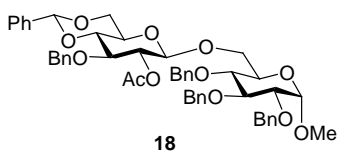

**Methyl 6-O-(2-O-acetyl-3-O-benzyl-4,6-O-benzylidene- $\beta$ -D-glucopyranosyl)-2,3,4-tri-O-benzyl- $\alpha$ -D-glucopyranoside (18).** TMSOTf (9  $\mu\text{L}$ , 52  $\mu\text{mol}$ ) was added to a solution of compound **1** (200 mg, 348  $\mu\text{mol}$ ) and benzaldehyde (39  $\mu\text{L}$ , 383  $\mu\text{mol}$ ) in CH<sub>2</sub>Cl<sub>2</sub> (3 mL) with freshly dried 3 Å molecular sieves (400 mg) at –78 °C under N<sub>2</sub> atmosphere. The mixture was kept stirring at the same temperature for 2 h. Et<sub>3</sub>SiH (61  $\mu\text{L}$ , 383  $\mu\text{mol}$ ), benzaldehyde (37  $\mu\text{L}$ ,

366  $\mu\text{mol}$ ) and TMSOTf (9  $\mu\text{L}$ , 52  $\mu\text{mol}$ ) were consecutively added to the reaction solution. After stirring at  $-78\text{ }^\circ\text{C}$  for 2.5 h,  $\text{Ac}_2\text{O}$  (40  $\mu\text{L}$ , 365  $\mu\text{mol}$ ) and TMSOTf (9  $\mu\text{L}$ , 52  $\mu\text{mol}$ ) were consecutively added to the solution, the reaction flask was moved to  $0\text{ }^\circ\text{C}$ , and the mixture was stirred at the same temperature 1 h. The solution of glycosyl acceptor **17** (156 mg, 522  $\mu\text{mol}$ ) in  $\text{CH}_2\text{Cl}_2$  (1 ml), NIS (97 mg, 420  $\mu\text{mol}$ ) and TfOH (6  $\mu\text{L}$ , 70  $\mu\text{mol}$ ) were sequentially added to the solution at  $-78\text{ }^\circ\text{C}$ . The reaction temperature gradually raised to  $0\text{ }^\circ\text{C}$  for a period of 2 h. Saturated  $\text{NaHCO}_{3(\text{aq})}$  (5 mL) and 10%  $\text{Na}_2\text{S}_2\text{O}_{3(\text{aq})}$  (5 mL) were added to quench the reaction, the mixture was filtered through Celite followed by extraction with  $\text{CH}_2\text{Cl}_2$ , and the combined organic layer was dried over anhydrous  $\text{MgSO}_4$ , filtered and concentrated under reduced pressure. Purification of the residue via flash column chromatography (ethyl acetate/hexanes = 1/3) furnished the desired adduct **18** (121 mg, 41%) as a white foam.  $[\alpha]_{\text{D}}^{27} +10.7$  (*c* 3.4 in  $\text{CHCl}_3$ ); IR (thin film):  $\nu$  2927, 1752, 1230, 1095, 1070, 698  $\text{cm}^{-1}$ ;  $^1\text{H}$  NMR (600 MHz,  $\text{CDCl}_3$ ):  $\delta$  7.48–7.47 (2 H, m, Ar-H), 7.41–7.25 (23 H, m, Ar-H), 5.46 (1 H, s, ArCH), 4.91–4.88 (2 H, m, 2-H', ArCH<sub>2</sub>), 4.85 (1 H, d, *J* 12.1, ArCH<sub>2</sub>), 4.80–4.76 (2 H, m, ArCH<sub>2</sub>), 4.72 (1 H, d, *J* 12.0, ArCH<sub>2</sub>), 4.63–4.60 (2 H, m, ArCH<sub>2</sub>), 4.57 (1 H, d, *J* 3.6, 1-H), 4.40 (1 H, d, *J* 8.1, 1-H'), 4.37 (1 H, d, *J* 12.0, ArCH<sub>2</sub>), 4.11 (1 H, dd, *J* 10.5, 4.9, 6-H'<sub>a</sub>), 3.86–3.80 (2 H, m, 3-H, 4-H), 3.73 (1 H, dd, *J* 10.5, 2.7, 6-H<sub>a</sub>), 3.63 (1 H, t, *J* 9.3, 3-H), 3.73 (1 H, dd, *J* 10.5, 2.7, 6-H<sub>a</sub>), 3.59–3.55 (2 H, m, 5-H, 6-H<sub>b</sub>), 3.50–3.44 (2 H, m, 2-H, 3-H'), 3.40 (1 H, t, *J* 10.3, 6-H'<sub>b</sub>), 3.36 (3 H, s, OCH<sub>3</sub>), 3.12 (1 H, td, *J* 9.7, 5.0, 5-H'), 1.91 (3 H, s, CH<sub>3</sub>);  $^{13}\text{C}$  NMR (150 MHz,  $\text{CDCl}_3$ ):  $\delta$  169.0 (C), 139.3 (C), 138.3 (C), 137.6 (C), 137.2 (C), 129.0 (CH), 128.5 (CH), 128.4 (CH), 128.3 (CH), 128.26 (CH), 128.22 (CH), 128.20 (CH), 128.1 (CH), 128.0 (CH), 127.7 (CH), 127.67 (CH), 127.60 (CH), 127.4 (CH), 127.2 (CH), 126.0 (CH), 101.1 (CH), 100.7 (CH), 98.4 (CH), 81.6 (CH), 79.8 (CH), 78.8 (CH), 78.5 (CH), 75.3 (CH<sub>2</sub>), 73.9 (CH<sub>2</sub>), 73.6 (CH<sub>2</sub>), 73.5 (CH<sub>2</sub>), 73.2

(CH), 69.8 (CH), 68.5 (CH<sub>2</sub>), 67.4 (CH<sub>2</sub>), 65.8 (CH), 55.3 (CH<sub>3</sub>), 20.9 (CH<sub>3</sub>); HRMS (ESI): *m/z* calcd for C<sub>50</sub>H<sub>54</sub>O<sub>12</sub>Na ([M + Na]<sup>+</sup>): 869.3513, found: 869.3499.

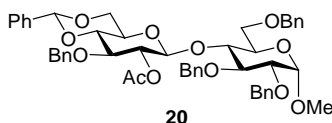

**Methyl 4-*O*-(2-*O*-acetyl-3-*O*-benzyl-4,6-*O*-benzylidene- $\beta$ -D-glucopyranosyl)-2,3,6-tri-*O*-benzyl- $\alpha$ -D-glucopyranoside (20).** TMSOTf (5  $\mu$ L, 32  $\mu$ mol) was added to a solution of compound **1** (120 mg, 215  $\mu$ mol) and benzaldehyde (24  $\mu$ L, 237  $\mu$ mol) in CH<sub>2</sub>Cl<sub>2</sub> (2 mL) with freshly dried 3 Å molecular sieves (240 mg) at -78 °C under N<sub>2</sub> atmosphere. The mixture was kept stirring at the same temperature for 2 h. Et<sub>3</sub>SiH (37  $\mu$ L, 237  $\mu$ mol), benzaldehyde (22  $\mu$ L, 226  $\mu$ mol) and TMSOTf (5  $\mu$ L, 32  $\mu$ mol) were consecutively added to the reaction solution. After stirring at -78 °C for 2.5 h, Ac<sub>2</sub>O (20  $\mu$ L, 226  $\mu$ mol) and TMSOTf (5  $\mu$ L, 32  $\mu$ mol) were consecutively added to the mixture, and the reaction flask was moved to 0 °C, where the mixture was stirred for 1 h. Then, the vessel was cooled again to -78 °C, and a solution of the glycosyl acceptor **19** (120 mg, 323  $\mu$ mol) in CH<sub>2</sub>Cl<sub>2</sub> (1 mL), NIS (60 mg, 258  $\mu$ mol) and TfOH (4  $\mu$ L, 43  $\mu$ mol) were sequentially added to the mixture. Reaction temperature was gradually raised up to 0 °C for a period of 2 h. Saturated NaHCO<sub>3(aq)</sub> (5 mL) and 10% Na<sub>2</sub>S<sub>2</sub>O<sub>3(aq)</sub> (5 mL) were added to quench the reaction. The mixture was filtered through Celite, and the desired material was extracted with CH<sub>2</sub>Cl<sub>2</sub>. The combined organic layer was dried over anhydrous MgSO<sub>4</sub>, filtered and concentrated under reduced pressure. Purification of the residue via flash column chromatography (ethyl acetate/hexanes = 1/3) furnished the adduct **20** (95 mg, 52%) as a white foam. [ $\alpha$ ]<sub>D</sub><sup>27</sup> +4.33 (*c* 3.5 in CHCl<sub>3</sub>); IR (thin film):  $\nu$  2871, 1752, 1493, 1229, 1096, 1062, 738, 697 cm<sup>-1</sup>; <sup>1</sup>H NMR (600 MHz, CDCl<sub>3</sub>):  $\delta$  7.49–7.48 (2 H, m, Ar-H), 7.40–7.23 (23 H, m, Ar-H),

5.55 (1 H, s, PhCH), 5.08 (1 H, t,  $J$  8.3, 2-H'), 4.97 (1 H, d,  $J$  11.0, ArCH<sub>2</sub>), 4.87–4.77 (4 H, m, ArCH<sub>2</sub>), 4.66–4.63 (2 H, m, ArCH<sub>2</sub>), 4.57 (1 H, d,  $J$  3.3, 1-H), 4.51 (1 H, d,  $J$  11.0, ArCH<sub>2</sub>), 4.47 (1 H, d,  $J$  8.3, 1-H'), 4.32 (1 H, dd,  $J$  10.5, 5.0, 6-H'<sub>a</sub>), 4.04 (1 H, d,  $J$  10.3, 6-H<sub>a</sub>), 3.96 (1 H, t,  $J$  9.3, 3-H), 3.81–3.67 (5 H, m, 5-H, 6-H<sub>b</sub>, 3-H', 4-H', 6-H'<sub>b</sub>), 3.52 (1 H, dd,  $J$  9.8, 3.5, 2-H), 3.45 (1 H, t,  $J$  9.5, 4-H), 3.40 (1 H, td,  $J$  9.7, 5.0, 5-H'), 3.34 (3 H, s, OCH<sub>3</sub>), 1.88 (3 H, s, CH<sub>3</sub>); <sup>13</sup>C NMR (150 MHz, CDCl<sub>3</sub>):  $\delta$  169.0 (C), 138.7 (C), 138.2 (C), 138.1 (C), 138.0 (C), 137.1 (C), 129.0 (CH), 128.4 (CH), 128.3 (CH), 128.25 (CH), 128.23 (CH), 128.1 (CH), 127.9 (CH), 127.8 (CH), 127.7 (CH), 127.6 (CH), 127.5 (CH), 125.9 (CH), 101.4 (CH), 101.2 (CH), 98.1 (CH), 81.9 (CH), 81.3 (CH), 79.7 (CH), 78.5 (CH), 77.5 (CH), 75.6 (CH<sub>2</sub>), 74.8 (CH<sub>2</sub>), 74.0 (CH<sub>2</sub>), 73.4 (CH<sub>2</sub>), 72.6 (CH<sub>2</sub>), 69.5 (CH), 68.5 (CH<sub>2</sub>), 68.0 (CH<sub>2</sub>), 66.3 (CH), 55.1 (CH<sub>3</sub>), 20.8 (CH<sub>3</sub>); HRMS (ESI):  $m/z$  calcd for C<sub>50</sub>H<sub>54</sub>O<sub>12</sub>Na ([M + Na]<sup>+</sup>): 869.3513, found: 869.3547.

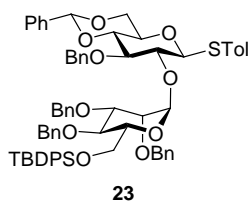

**4-Methylphenyl 2-O-(6-O-tert-butylidiphenylsilyl-2,3,4-tri-O-benzyl- $\alpha$ -D-mannopyranosyl)-3-O-benzyl-4,6-O-benzylidene-1-thio- $\beta$ -D-glucopyranoside (23).** TMSOTf (9  $\mu$ L, 52  $\mu$ mol) was added to a solution of compound **1** (200 mg, 348  $\mu$ mol) and benzaldehyde (39  $\mu$ L, 383  $\mu$ mol) in CH<sub>2</sub>Cl<sub>2</sub> (3 mL) with freshly dried 3 Å molecular sieves (400 mg) at –78 °C under N<sub>2</sub> atmosphere. The mixture was stirred at same temperature for 2 h. Et<sub>3</sub>SiH (61  $\mu$ L, 383  $\mu$ mol), benzaldehyde (37  $\mu$ L, 366  $\mu$ mol) and TMSOTf (9  $\mu$ L, 52  $\mu$ mol) were sequentially added to the reaction solution. After stirring at –78 °C for 2.5 h, a solution of glycosyl donor **22** (406 mg, 520  $\mu$ mol) in CH<sub>2</sub>Cl<sub>2</sub> (7.5 ml), NIS (129 mg, 560  $\mu$ mol), AW-300 molecular sieves (700 mg)

and TfOH (16  $\mu\text{L}$ , 104  $\mu\text{mol}$ ) were sequentially added to the mixture at  $-78\text{ }^\circ\text{C}$ . The reaction temperature was gradually raised to  $-40\text{ }^\circ\text{C}$  for a period of 3 h. Saturated  $\text{NaHCO}_3(\text{aq})$  (10 mL) and 10%  $\text{Na}_2\text{S}_2\text{O}_3(\text{aq})$  (10 mL) were added to quench the reaction. The mixture was filtered through Celite followed by extraction with  $\text{CH}_2\text{Cl}_2$ . The combined organic layer was dried over anhydrous  $\text{MgSO}_4$ , filtered and concentrated under reduced pressure. Purification of the residue via flash column chromatography (ethyl acetate/hexanes = 1/4) furnished the adduct **23** (286 mg, 72%) as a white foam.  $[\alpha]_D^{26} +11.04$  ( $c$  1.2 in  $\text{CHCl}_3$ ); IR (thin film):  $\nu$  2857, 1494, 1454, 1028, 697  $\text{cm}^{-1}$ ;  $^1\text{H}$  NMR (600 MHz,  $\text{CDCl}_3$ ):  $\delta$  7.74–7.72 (2 H, m, Ar-H), 7.64–7.62 (2 H, m, Ar-H), 7.46–7.38 (8 H, m, Ar-H), 7.34–7.22 (20 H, m, Ar-H), 7.17–7.16 (2 H, m, Ar-H), 7.09–7.07 (2 H, m, Ar-H), 7.03–7.00 (1 H, m, Ar-H), 6.94–6.91 (2 H, m, Ar-H), 5.63 (1 H, d,  $J$  0.7, 1-H'), 5.52 (1 H, s, ArCH), 5.01 (1 H, d,  $J$  10.9, ArCH<sub>2</sub>), 4.84 (1 H, d,  $J$  12.7, ArCH<sub>2</sub>), 4.85–4.78 (3 H, m, ArCH<sub>2</sub>), 4.71–4.67 (3 H, m, ArCH<sub>2</sub>), 4.57–4.54 (2 H, m, 1-H, ArCH<sub>2</sub>), 4.38–4.34 (2 H, m, 6-H<sub>a</sub>, 3-H), 3.98–3.96 (2 H, m, 3-H, 2-H'), 3.92 (1 H, d,  $J$  9.7, 4-H'), 3.75 (1 H, t,  $J$  10.3, 6-H<sub>b</sub>), 3.66–3.62 (4 H, m, 2-H, 4-H, 5-H', 6-H'<sub>a</sub>), 3.51 (1 H, dd,  $J$  11.3, 1.0, 6-H'<sub>b</sub>), 3.51 (1 H, dt,  $J$  9.6, 5.1, 5-H), 2.35 (3 H, s, CH<sub>3</sub>), 1.04 (9 H, s, *t*-Bu);  $^{13}\text{C}$  NMR (150 MHz,  $\text{CDCl}_3$ ):  $\delta$  139.1 (C), 138.7 (C), 138.6 (C), 138.2 (C), 137.5 (C), 137.1 (C), 136.0 (CH), 135.6 (CH), 134.1 (C), 133.6 (C), 132.8 (CH), 129.8 (CH), 129.3 (CH), 129.27 (CH), 128.9 (CH), 128.7 (C), 128.5 (CH), 128.3 (CH), 128.23 (CH), 128.21 (CH), 128.16 (CH), 128.10 (CH), 127.9 (CH), 127.7 (CH), 127.53 (CH), 127.52 (CH), 127.49 (CH), 127.44 (CH), 127.38 (CH), 127.31 (CH), 125.9 (CH), 101.1 (CH), 98.0 (CH), 88.6 (CH), 81.7 (CH), 81.2 (CH), 79.8 (CH), 76.0 (CH), 75.14 (CH), 75.13 (CH<sub>2</sub>), 75.0 (CH<sub>2</sub>), 74.3 (CH), 73.2 (CH), 72.2 (CH<sub>2</sub>), 72.1 (CH<sub>2</sub>), 70.1 (CH), 68.6 (CH<sub>2</sub>), 62.4 (CH<sub>2</sub>), 26.8 (CH<sub>3</sub>), 21.1 (CH<sub>3</sub>), 19.3 (C); HRMS (ESI):  $m/z$  calcd for  $\text{C}_{70}\text{H}_{74}\text{O}_{10}\text{SSiNa}$  ( $[\text{M} + \text{Na}]^+$ ): 1157.4670, found 1157.4663.

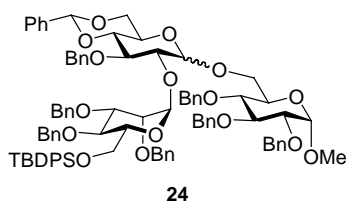

**Methyl (6-*O*-*tert*-butyldiphenylsilyl-2,3,4-tri-*O*-benzyl- $\alpha$ -D-mannopyranosyl)-(1 $\rightarrow$ 2)-3-*O*-benzyl-4,6-*O*-benzylidene- $\alpha$ / $\beta$ -D-glucopyranosyl)-(1 $\rightarrow$ 6)-2,3,4-tri-*O*-benzyl- $\alpha$ -D-glucopyranoside (**24**).** TMSOTf (4  $\mu$ L, 23  $\mu$ mol) was added to a solution of compound **1** (87 mg, 152  $\mu$ mol) and benzaldehyde (17  $\mu$ L, 166  $\mu$ mol) in CH<sub>2</sub>Cl<sub>2</sub> (1.5 mL) with freshly dried 3 Å molecular sieves (200 mg) at -78 °C under N<sub>2</sub> atmosphere. The mixture was stirred at same temperature for 2 h. Et<sub>3</sub>SiH (27  $\mu$ L, 166  $\mu$ mol), benzaldehyde (16  $\mu$ L, 160  $\mu$ mol) and TMSOTf (4  $\mu$ L, 23  $\mu$ mol) were sequentially added to the reaction solution. After stirring at -78 °C for 2.5 h, a solution of glycosyl donor **22** (176 mg, 226  $\mu$ mol) in CH<sub>2</sub>Cl<sub>2</sub> (3.5 mL), NIS (63 mg, 270  $\mu$ mol), AW-300 molecular sieves (300 mg) and TfOH (3  $\mu$ L, 35  $\mu$ mol) were sequentially added to the mixture at -78 °C. The reaction temperature was gradually raised to -40 °C for a period of 3 h. Then, a solution of glycosyl acceptor **17** (101 mg, 270  $\mu$ mol) in CH<sub>2</sub>Cl<sub>2</sub> (1.5 mL), NIS (56 mg, 240  $\mu$ mol) and TfOH (7  $\mu$ L, 75  $\mu$ mol) were sequentially added to the solution at -40 °C, and the reaction temperature was gradually raised to 0 °C for a period of 2 h. Saturated NaHCO<sub>3(aq)</sub> (5 mL) and 10% Na<sub>2</sub>S<sub>2</sub>O<sub>3(aq)</sub> (5 mL) were added to quench the reaction, the mixture was filtered through Celite followed by extraction with CH<sub>2</sub>Cl<sub>2</sub>, and the combined organic layer was dried over anhydrous MgSO<sub>4</sub>, filtered and concentrated under reduced pressure. Purification of the residue via flash column chromatography (ethyl acetate/hexanes = 1/6) furnished the trisaccharide **24** (117 mg, 52%, crude  $\alpha/\beta$  = 2/1). <sup>1</sup>H NMR (600 MHz, CDCl<sub>3</sub>):  $\delta$  7.69–7.61 (10.1 H, m, Ar-H), 7.45–7.41 (5.5 H, m, Ar-H), 7.38–7.25 (68.2 H, m, Ar-H), 7.23–7.15 (29.7 H,

m, Ar-H), 7.12–7.04 (1.5 H, m, Ar-H), 7.01–6.96 (3.9 H, m, Ar-H), 6.89–6.86 (3 H, m, Ar-H), 5.62 (1 H, d,  $J$  1.1), 5.50 (1.3 H, s, ArCH), 5.45 (1 H, s, ArCH), 5.06 (1 H, d,  $J$  2.8), 5.04 (1 H, d,  $J$  1.3), 4.99–4.89 (7.4 H, m), 4.84–4.81 (2.2 H, m), 4.77–4.73 (4 H, m), 4.71–4.60 (13.1 H, m), 4.58–4.55 (4.2 H, m), 4.52–4.47 (3.9 H, m), 4.40–4.35 (4.2 H, m), 4.31–4.26 (2.8 H, m), 4.19–4.16 (1 H, m), 4.12–4.06 (2.4 H, m), 4.02–3.94 (6.1 H, m), 3.91–3.78 (12.9 H, m), 3.74–3.71 (3 H, m), 3.68–3.45 (12.5 H, m), 3.40–3.38 (1.5 H, m), 3.36–3.27 (6 H, m), 3.32 (4 H, s), 1.03 (25.9 H, m); HRMS (ESI):  $m/z$  calcd for  $C_{91}H_{98}O_{16}SiNa$  ( $[M + Na]^+$ ): 1497.6522, found: 1497.6523.

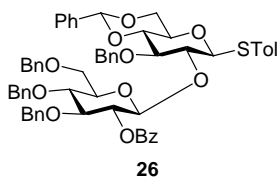

**4-Methylphenyl 2-O-(2-O-benzoyl-3,4,6-tri-O-benzyl- $\beta$ -D-glucopyranosyl)-3-O-benzyl-4,6-O-benzylidene-1-thio- $\beta$ -D-glucopyranoside (26).** TMSOTf (4  $\mu$ L, 23  $\mu$ mol) was added to a solution of compound **1** (87 mg, 152  $\mu$ mol) and benzaldehyde (17  $\mu$ L, 166  $\mu$ mol) in  $CH_2Cl_2$  (1.5 mL) with freshly dried 3 Å molecular sieves (200 mg) at  $-78$  °C under  $N_2$  atmosphere. The mixture was stirred at same temperature for 2 h.  $Et_3SiH$  (27  $\mu$ L, 165  $\mu$ mol), benzaldehyde (16  $\mu$ L, 160  $\mu$ mol) and TMSOTf (4  $\mu$ L, 23  $\mu$ mol) were sequentially added to the reaction solution. After stirring at  $-78$  °C for 2.5 h, a solution of glycosyl donor **25** (110 mg, 166  $\mu$ mol) in  $CH_2Cl_2$  (3 mL), NIS (46 mg, 198  $\mu$ mol), AW-300 molecular sieves (300 mg) and TfOH (3  $\mu$ L, 30  $\mu$ mol) were sequentially added to the solution at  $-78$  °C. The reaction temperature was gradually raised to  $-60$  °C for 3 h. Saturated  $NaHCO_{3(aq)}$  (10 mL) and 10%  $Na_2S_2O_{3(aq)}$  (10 mL) were added to quench the reaction, and the mixture was filtered through Celite followed by extraction with  $CH_2Cl_2$ . The combined organic layer was dried over anhydrous  $MgSO_4$ , filtered, and

concentrated under reduced pressure. Purification of the residue via flash column chromatography (ethyl acetate/hexanes = 1/5) furnished the adduct **26** (105 mg, 70%) as a white foam.  $[\alpha]_D^{27} -6.9$  (*c* 1.4 in  $\text{CHCl}_3$ ); IR (thin film):  $\nu$  2866, 1730, 1453, 1266, 1092, 1027, 697  $\text{cm}^{-1}$ ;  $^1\text{H}$  NMR (600 MHz,  $\text{CDCl}_3$ ):  $\delta$  7.91 (1 H, d, *J* 7.2, Ar-H), 7.52–7.49 (1 H, m, Ar-H), 7.45–7.43 (2 H, m, Ar-H), 7.39–7.37 (4 H, m, Ar-H), 7.34–7.29 (15 H, m, Ar-H), 7.27–7.23 (3 H, m, Ar-H), 7.14–7.11 (5 H, m, Ar-H), 7.09–7.07 (2 H, m, Ar-H), 7.03–7.00 (1 H, m, Ar-H), 5.48 (1 H, s, ArCH), 5.40 (1 H, dd, *J* 9.4, 8.1, 2-H'), 5.26 (1 H, d, *J* 8.1, 1-H'), 4.80–4.78 (2 H, m, ArCH<sub>2</sub>), 4.76 (1 H, d, *J* 11.2, ArCH<sub>2</sub>), 4.67–4.65 (4 H, m, 1-H, ArCH<sub>2</sub>), 4.51 (1 H, d, *J* 11.1, ArCH<sub>2</sub>), 4.30 (1 H, dd, *J* 10.6, 5.1, 6-H<sub>a</sub>), 3.94–3.90 (2 H, m, 2-H, 4-H'), 3.87 (1 H, dd, *J* 11.4, 4.1, 6-H'<sub>a</sub>), 3.82–3.77 (2 H, m, 3-H', 6-H'<sub>b</sub>), 3.71 (1 H, t, *J* 10.4, 6-H<sub>b</sub>), 3.66–3.61 (2 H, m, 3-H, 4-H), 3.51 (1 H, ddd, *J* 9.8, 4.0, 1.7, 5-H'), 3.36 (1 H, dt, *J* 9.5, 5.1, 5-H), 2.33 (3 H, s, CH<sub>3</sub>);  $^{13}\text{C}$  NMR (150 MHz,  $\text{CDCl}_3$ ):  $\delta$  165.1 (C), 138.4 (C), 138.3 (C), 137.9 (C), 137.8 (C), 137.6 (C), 137.1 (C), 133.0 (CH), 129.8 (C), 129.7 (CH), 129.6 (C), 129.5 (CH), 128.9 (CH), 128.43 (CH), 128.40 (CH), 128.35 (CH), 128.32 (CH), 128.2 (CH), 128.16 (CH), 128.12 (CH), 127.9 (CH), 127.8 (CH), 127.68 (CH), 127.65 (CH), 127.56 (CH), 127.4 (CH), 127.3 (CH), 125.9 (CH), 101.1 (CH), 100.5 (CH), 87.2 (CH), 83.5 (CH), 82.8 (CH), 81.5 (CH), 78.0 (CH), 76.1 (CH), 75.5 (CH<sub>2</sub>), 75.1 (CH<sub>2</sub>), 74.9 (CH<sub>2</sub>), 74.7 (CH<sub>2</sub>), 73.9 (CH), 73.87 (CH<sub>2</sub>), 69.7 (CH), 68.6 (CH<sub>2</sub>), 68.58 (CH<sub>2</sub>), 21.1 (CH<sub>3</sub>); HRMS (ESI): *m/z* calcd for C<sub>61</sub>H<sub>60</sub>O<sub>11</sub>SNa ([M + Na]<sup>+</sup>): 1023.3754, found: 1023.3745.

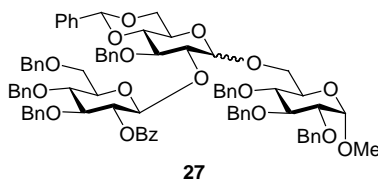



**Methyl (2-*O*-benzoyl-3,4,6-tri-*O*-benzyl- $\beta$ -D-glucopyranosyl)-(1 $\rightarrow$ 2)-3-*O*-benzyl-4,6-*O*-benzylidene- $\alpha/\beta$ -D-glucopyranosyl)-(1 $\rightarrow$ 6)-2,3,4-tri-*O*-benzyl- $\alpha$ -D-glucopyranoside (27).**

TMSOTf (4  $\mu$ L, 23  $\mu$ mol) was added to a solution of compound **1** (87 mg, 152  $\mu$ mol) and benzaldehyde (17  $\mu$ L, 166  $\mu$ mol) in CH<sub>2</sub>Cl<sub>2</sub> (1.5 mL) with freshly dried 3 Å molecular sieves (200 mg) at -78 °C under N<sub>2</sub> atmosphere. The mixture was stirred at same temperature for 2 h. Et<sub>3</sub>SiH (27  $\mu$ L, 166  $\mu$ mol), benzaldehyde (16  $\mu$ L, 160  $\mu$ mol) and TMSOTf (4  $\mu$ L, 23  $\mu$ mol) were sequentially added to the reaction solution. After stirring -78 °C for 2.5 h, a solution of glycosyl donor **25** (110 mg, 167  $\mu$ mol) in CH<sub>2</sub>Cl<sub>2</sub> (3 ml), NIS (46 mg, 200  $\mu$ mol), AW-300 molecular sieves (300 mg) and TfOH (3  $\mu$ L, 30  $\mu$ mol) were sequentially added to the solution at -78 °C. The reaction temperature was gradually raised to -60 °C for a period of 3 h. Then, a solution of the glycosyl acceptor **17** (84 mg, 228  $\mu$ mol) in CH<sub>2</sub>Cl<sub>2</sub> (1.5 ml), NIS (42 mg, 182  $\mu$ mol) and TfOH (7  $\mu$ L, 75  $\mu$ mol) were sequentially added to the mixture at -60 °C. The reaction temperature was gradually raised to 0 °C for a period of 2 h. Saturated NaHCO<sub>3(aq)</sub> (5 mL) and 10% Na<sub>2</sub>S<sub>2</sub>O<sub>3(aq)</sub> (5 mL) were added to quench the reaction, the mixture was filtered through Celite followed by extraction with CH<sub>2</sub>Cl<sub>2</sub>, and the combined organic layer was dried over anhydrous MgSO<sub>4</sub>, filtered and concentrated under reduced pressure. Purification of the residue via flash column chromatography (ethyl acetate/hexanes = 1/3) furnished the trisaccharide **27** (131 mg, 65%, crude  $\alpha/\beta$  = 3/1). For the  $\alpha$ -isomer:  $[\alpha]_D^{27} +63.1$  (*c* 1.2 in CHCl<sub>3</sub>); IR (thin film):  $\nu$  2859, 1731, 1453, 1365, 1266, 1089, 1027, 736 cm<sup>-1</sup>; <sup>1</sup>H NMR (600 MHz, CDCl<sub>3</sub>):  $\delta$  7.88 (2 H, d, *J* 8.3, Ar-H), 7.42 (1 H, t, *J* 7.4, Ar-H), 7.39–7.34 (6 H, m, Ar-H), 7.32–7.25 (20 H, m, Ar-H), 7.23–7.15 (9 H, m, Ar-H), 7.13–7.10 (5 H, m, Ar-H), 7.06–7.04 (2 H, m, Ar-H), 5.47 (1 H, s, ArCH), 5.38 (1 H, t, *J* 8.5, 2-H'), 5.13 (1 H, d, *J* 3.5, 1-H'), 5.00 (1 H, d, *J* 11.0, ArCH<sub>2</sub>), 4.96 (1 H, d, *J* 8.5, 1-H'), 4.91 (1 H, d, *J* 11.2, ArCH<sub>2</sub>), 4.84 (1 H, d, *J* 11.0,

ArCH<sub>2</sub>), 4.79 (1 H, d, *J* 12.0, ArCH<sub>2</sub>), 4.76 (1 H, d, *J* 10.8, ArCH<sub>2</sub>), 4.73–4.69 (2 H, m, ArCH<sub>2</sub>), 4.66–4.64 (2 H, m, ArCH<sub>2</sub>), 4.60 (1 H, d, *J* 11.2, ArCH<sub>2</sub>), 4.57 (1 H, d, *J* 11.7, ArCH<sub>2</sub>), 4.54 (1 H, d, *J* 12.2, ArCH<sub>2</sub>), 4.51–4.48 (2 H, m, ArCH<sub>2</sub>), 4.38 (1 H, d, *J* 11.6, ArCH<sub>2</sub>), 4.20 (1 H, dd, *J* 10.2, 4.9, 6-H'<sub>a</sub>), 4.02 (1 H, t, *J* 9.3, 3-H), 3.88–3.63 (12 H, m, 2-H, 4-H, 6-H × 2, 2-H', 3-H', 4-H', 6-H'<sub>b</sub>, 3-H'', 4-H'', 6-H'' × 2), 3.57–3.52 (3 H, m, 5-H, 5-H', 5-H''), 3.35 (3 H, s, CH<sub>3</sub>); <sup>13</sup>C NMR (150 MHz, CDCl<sub>3</sub>): δ 164.7 (C), 139.1 (C), 138.6 (C), 138.5 (C), 138.4 (C), 137.9 (C), 137.8 (C), 137.7 (C), 137.4 (C), 132.8 (CH), 129.8 (C), 129.7 (CH), 128.1 (CH), 128.4 (CH), 128.34 (CH), 128.30 (CH), 128.28 (CH), 128.21 (CH), 128.1 (CH), 128.08 (CH), 128.05 (CH), 127.97 (CH), 127.93 (CH), 127.8 (CH), 127.78 (CH), 127.70 (CH), 127.65 (CH), 127.60 (CH), 127.5 (CH), 127.3 (CH), 127.21 (CH), 127.18 (CH), 126.0 (CH), 101.8 (CH), 101.3 (CH), 99.6 (CH), 97.7 (CH), 82.9 (CH), 82.2 (CH), 80.3 (CH), 78.4 (CH), 78.2 (CH), 77.9 (CH), 77.8 (CH), 75.6 (CH<sub>2</sub>), 75.1 (CH<sub>2</sub>), 75.0 (CH<sub>2</sub>), 74.8 (CH<sub>2</sub>), 74.5 (CH<sub>2</sub>), 73.7 (CH), 73.3 (CH<sub>2</sub>), 70.0 (CH), 69.1 (CH<sub>2</sub>), 68.8 (CH<sub>2</sub>), 67.0 (CH<sub>2</sub>), 62.4 (CH), 55.1 (CH<sub>3</sub>); HRMS (ESI): *m/z* calcd for C<sub>82</sub>H<sub>84</sub>O<sub>17</sub>Na ([M + Na]<sup>+</sup>): 1363.5606, found: 1363.5602. For the β-isomer: IR (thin film): ν 2925, 1731, 1453, 1266, 1093, 737, 697 cm<sup>-1</sup>; <sup>1</sup>H NMR (600 MHz, CDCl<sub>3</sub>): δ 7.81 (2 H, d, *J* 7.3, Ar-H), 7.46–7.41 (3 H, m, Ar-H), 7.34–7.31 (6 H, m, Ar-H), 7.30–7.21 (26 H, m, Ar-H), 7.17–7.14 (1 H, m, Ar-H), 7.10–7.02 (7 H, m, Ar-H), 5.42 (1 H, s, ArCH), 5.17 (1 H, t, *J* 8.2, 2-H''), 5.11 (1 H, d, *J* 8.2, 1-H''), 5.00–4.97 (2 H, m, ArCH<sub>2</sub>), 4.85–4.81 (2 H, m, ArCH<sub>2</sub>), 4.70–4.67 (2 H, m, ArCH<sub>2</sub>), 4.61–4.51 (4 H, m, 1-H, ArCH<sub>2</sub>), 4.52–4.48 (4 H, m, 1-H', ArCH<sub>2</sub>), 4.39 (1 H, d, *J* 11.4, ArCH<sub>2</sub>), 4.26–4.24 (2 H, m, 6-H'<sub>a</sub>, ArCH<sub>2</sub>), 4.05 (1 H, d, *J* 10.3, 6-H''<sub>a</sub>), 3.98 (1 H, t, *J* 9.1, 3-H), 3.85 (1 H, t, *J* 7.8, 2-H'), 3.80 (1 H, dd, *J* 10.4, 3.2, 6-H''<sub>a</sub>), 3.77–3.76 (2 H, m, 4-H, 4-H''), 3.71–3.60 (5 H, m, 6-H × 2, 4-H', 6-H'<sub>b</sub>, 3-H''), 3.57–3.48 (3 H, m, 2-H, 3-H', 5-H''), 3.36 (3 H, s, CH<sub>3</sub>), 3.34–3.40 (2 H, m, 5-H, 5-H'); <sup>13</sup>C NMR (150 MHz, CDCl<sub>3</sub>): δ 164.9 (C), 139.0 (C),

138.8 (C), 138.4 (C), 138.3 (C), 138.2 (C), 137.8 (C), 137.1 (C), 132.9 (CH), 129.8 (C), 129.7 (CH), 128.9 (CH), 128.5 (CH), 128.4 (CH), 128.3 (CH), 128.22 (CH), 128.20 (CH), 128.1 (CH), 128.0 (CH), 127.9 (CH), 127.88 (CH), 127.83 (CH), 127.78 (CH), 127.5 (CH), 127.49 (CH), 127.45 (CH), 127.2 (CH), 125.9 (CH), 102.1 (CH), 101.0 (CH), 100.7 (CH), 97.9 (CH), 82.8 (CH), 82.1 (CH), 82.05 (CH), 81.3 (CH), 80.0 (CH), 78.7 (CH), 78.3 (CH), 77.6 (CH), 75.8 (CH<sub>2</sub>), 75.2 (CH<sub>2</sub>), 75.1 (CH), 75.0 (CH<sub>2</sub>), 74.7 (CH<sub>2</sub>), 74.5 (CH<sub>2</sub>), 74.0 (CH), 73.3 (CH<sub>2</sub>), 73.2 (CH<sub>2</sub>), 69.9 (CH), 69.2 (CH<sub>2</sub>), 68.7 (CH<sub>2</sub>), 68.5 (CH<sub>2</sub>), 65.6 (CH), 55.2 (CH<sub>3</sub>); HRMS (ESI):  $m/z$  calcd for C<sub>82</sub>H<sub>84</sub>O<sub>17</sub>Na ([M + Na]<sup>+</sup>): 1363.5606, found: 1363.5601.

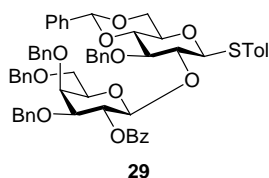

**4-Methylphenyl 2-O-(2-O-benzoyl-3,4,6-tri-O-benzyl-β-D-galactopyranosyl)-3-O-benzyl-4,6-O-benzylidene-1-thio-β-D-glucopyranoside (29).** TMSOTf (4 μL, 23 μmol) was added to a solution of compound **1** (87 mg, 152 μmol) and benzaldehyde (17 μL, 166 μmol) in CH<sub>2</sub>Cl<sub>2</sub> with freshly dried 3 Å molecular sieves (200 mg) at -78 °C under N<sub>2</sub> atmosphere. The mixture was stirred at same temperature for 2 h. Et<sub>3</sub>SiH (27 μL, 165 μmol), benzaldehyde (16 μL, 160 μmol) and TMSOTf (4 μL, 23 μmol) were sequentially added to the reaction mixture. After stirring at -78 °C for 2.5 h, a solution of glycosyl donor **28** (110 mg, 166 μmol) in CH<sub>2</sub>Cl<sub>2</sub> (3 mL), NIS (46 mg, 198 μmol), AW-300 molecular sieves (300 mg) and TfOH (3 μL, 30 μmol) were sequentially added again to the solution at -78 °C. The reaction temperature was gradually raised up to -60 °C for 3 h. Saturated NaHCO<sub>3(aq)</sub> (10 mL) and 10% Na<sub>2</sub>S<sub>2</sub>O<sub>3(aq)</sub> (10 mL) were added to quench the reaction, the mixture was filtered through Celite followed by extraction with

CH<sub>2</sub>Cl<sub>2</sub>, and the combined organic layer was dried over anhydrous MgSO<sub>4</sub>, filtered and concentrated under reduced pressure. Purification of the residue via flash column chromatography (ethyl acetate/hexanes = 1/5) furnished the adduct **29** (94 mg, 63%) as a white foam.  $[\alpha]_D^{27} -11.9$  (*c* 0.9 in CHCl<sub>3</sub>); IR (thin film):  $\nu$  1731, 1454, 1269, 1095, 751, 698 cm<sup>-1</sup>; <sup>1</sup>H NMR (600 MHz, CDCl<sub>3</sub>):  $\delta$  7.93 (2 H, d, *J* 8.1, Ar-H), 7.52 (1 H, t, *J* 7.0, Ar-H), 7.45 (2 H, d, *J* 8.1, Ar-H), 7.40 (2 H, d, *J* 7.0, Ar-H), 7.38–7.31 (14 H, m, Ar-H), 7.28–7.20 (7 H, m, Ar-H), 7.18–7.16 (4 H, m, Ar-H), 7.01 (2 H, d, *J* 8.1, Ar-H), 5.71 (1 H, t, *J* 8.1, 2-H'), 5.47 (1 H, s, ArCH), 5.19 (1 H, d, *J* 8.1, 1-H'), 5.03 (1 H, d, *J* 11.7, ArCH<sub>2</sub>), 4.68 (1 H, d, *J* 11.8, ArCH<sub>2</sub>), 4.64–4.61 (2 H, m, 1-H, ArCH<sub>2</sub>), 4.51 (1 H, d, *J* 11.1, ArCH<sub>2</sub>), 4.48–4.45 (2 H, m, ArCH<sub>2</sub>), 4.30 (1 H, dd, *J* 10.6, 5.1, 6-H<sub>a</sub>), 4.05 (1 H, d, *J* 2.4, 4-H'), 3.86 (1 H, t, *J* 8.8, 2-H), 3.75 (1 H, t, *J* 8.4, 6-H'<sub>a</sub>), 3.69 (1 H, t, *J* 10.4, 6-H<sub>b</sub>), 3.65 (1 H, t, *J* 9.2, 3-H), 3.62–3.55 (4 H, m, 3-H', 4-H', 5-H', 6-H'<sub>b</sub>), 3.35 (1 H, dt, *J* 9.8, 5.1, 5-H), 2.31 (3 H, s, CH<sub>3</sub>); <sup>13</sup>C NMR (150 MHz, CDCl<sub>3</sub>):  $\delta$  165.3 (C), 138.6 (C), 138.3 (C), 137.8 (C), 137.7 (C), 137.5 (C), 137.1 (C), 133.7 (CH), 132.9 (CH), 130.0 (C), 129.8 (CH), 129.4 (CH), 128.9 (C), 128.8 (CH), 128.5 (CH), 128.3 (CH), 128.26 (CH), 128.20 (CH), 128.1 (CH), 128.0 (CH), 127.9 (CH), 127.8 (CH), 127.7 (CH), 127.66 (CH), 127.50 (CH), 127.49 (CH), 127.44 (CH), 125.9 (CH), 101.0 (CH), 100.5 (CH), 86.6 (CH), 83.4 (CH), 81.4 (CH), 79.7 (CH), 76.0 (CH), 74.7 (CH<sub>2</sub>), 74.4 (CH<sub>2</sub>), 73.6 (CH<sub>2</sub>), 73.5 (CH), 72.4 (CH), 72.2 (CH), 71.4 (CH), 69.6 (CH), 68.6 (CH<sub>2</sub>), 68.3 (CH<sub>2</sub>), 21.1 (CH<sub>3</sub>); HRMS (ESI): *m/z* calcd for C<sub>61</sub>H<sub>60</sub>O<sub>11</sub>SNa ([M + Na]<sup>+</sup>): 1023.3754, found: 1023.3733.

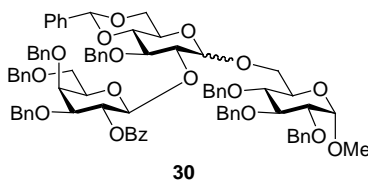

**Methyl (2-*O*-benzoyl-3,4,6-tri-*O*-benzyl- $\beta$ -D-galactopyranosyl)-(1 $\rightarrow$ 2)-(3-*O*-benzyl-4,6-*O*-benzylidene- $\alpha$ / $\beta$ -D-glucopyranosyl)-(1 $\rightarrow$ 6)-2,3,4-tri-*O*-benzyl- $\alpha$ -D-glucopyranoside (30).**

TMSOTf (4  $\mu$ L, 23  $\mu$ mol) was added to a solution of compound **1** (87 mg, 152  $\mu$ mol) and benzaldehyde (17  $\mu$ L, 166  $\mu$ mol) in CH<sub>2</sub>Cl<sub>2</sub> (1.5 mL) with freshly dried 3 Å molecular sieves (200 mg) at -78 °C under N<sub>2</sub> atmosphere. The mixture was kept stirring at same temperature for 2 h. Et<sub>3</sub>SiH (27  $\mu$ L, 166  $\mu$ mol), benzaldehyde (16  $\mu$ L, 160  $\mu$ mol) and TMSOTf (4  $\mu$ L, 23  $\mu$ mol) were sequentially added to the reaction solution. After 2.5 h of stirring at -78 °C, a solution of the glycosyl donor **28** (110 mg, 167  $\mu$ mol) in CH<sub>2</sub>Cl<sub>2</sub> (3 mL), NIS (46 mg, 200  $\mu$ mol), AW-300 molecular sieves (300 mg) and TfOH (3  $\mu$ L, 30  $\mu$ mol) were sequentially added to the mixture. The reaction temperature was gradually raised to -60 °C for 3 h. Then, a solution of the glycosyl acceptor **17** (84 mg, 228  $\mu$ mol) in CH<sub>2</sub>Cl<sub>2</sub> (1.5 mL), NIS (42 mg, 182  $\mu$ mol) and TfOH (7  $\mu$ L, 75  $\mu$ mol) were sequentially added to the solution at -60 °C. The reaction temperature was gradually raised to 0 °C for 2 h. Saturated NaHCO<sub>3(aq)</sub> (5 mL) and 10% Na<sub>2</sub>S<sub>2</sub>O<sub>3(aq)</sub> (5 mL) were added to quench the reaction, the mixture was filtered through Celite, and the desired material was extracted with CH<sub>2</sub>Cl<sub>2</sub>. The combined organic layer was dried over anhydrous MgSO<sub>4</sub>, filtered and concentrated under reduced pressure. Purification of the residue via flash column chromatography (ethyl acetate/hexanes = 1/3) provided the trisaccharide **30** (124 mg, 61%, crude  $\alpha/\beta$  = 2/1) as a white foam. <sup>1</sup>H NMR (600 MHz, CDCl<sub>3</sub>):  $\delta$  7.94–7.92 (2.4 H, m, Ar-H), 7.87–7.86 (2 H, m, Ar-H), 7.51–7.45 (4.5 H, m, Ar-H), 7.43–7.29 (45.8 H, m, Ar-H), 7.26–7.18 (25.5 H, m, Ar-H), 7.17–7.05 (20.4 H, m, Ar-H), 5.69 (1.2 H, t, *J* 8.9), 5.66 (1 H, t, *J* 8.9), 5.48 (1.2 H, s, PhCH), 5.45 (1 H, s, PhCH), 5.10–4.96 (9.1 H, m), 4.92–4.87 (4.1 H, m), 4.84–4.77 (4.2 H, m), 4.73–4.68 (6.1 H, m), 4.65–4.57 (7 H, m), 4.53 (1 H, d, *J* 7.4), 4.48–4.35 (9.4 H, m), 4.29 (1 H, dd, *J* 10.6, 5.1), 4.24–4.19 (2.2 H, m), 4.06–4.00 (4.5 H, m), 3.96 (1 H, d, *J* 2.5), 3.90–3.80 (8.6

H, m), 3.78–3.74 (3.1 H, m), 3.73–3.68 (5.8 H, m), 3.67–3.59 (8.6 H, m), 3.56–3.53 (2.1 H, m), 3.52–3.51 (1.5 h, m), 3.44 (1 H, t,  $J$  9.4), 3.38–3.37 (6.6 H, m), 3.36–3.34 (1.2 H, m); HRMS (ESI):  $m/z$  calcd for  $C_{82}H_{84}O_{17}Na$  ( $[M + Na]^+$ ): 1363.5606, found: 1363.5580.

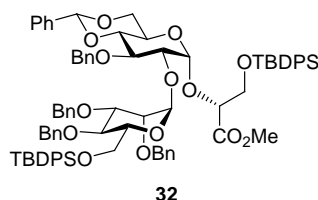

**Methyl 3-*O*-*tert*-butyl-(2*R*)-2-*O*-[3-*O*-benzyl-2-*O*-(2,3,4-tri-*O*-benzyl-6-*O*-*tert*-butyldiphenylsilyl)- $\alpha$ -D-mannopyranosyl]-4,6-*O*-benzylidene- $\alpha$ -D-glucopyranosyl]-2,3-dihydroxypropanoate (32).** TMSOTf (4  $\mu$ L, 23  $\mu$ mol) was added to a solution of compound **1** (87 mg, 152  $\mu$ mol) and benzaldehyde (17  $\mu$ L, 166  $\mu$ mol) in  $CH_2Cl_2$  (1.5 mL) with freshly dried 3 Å molecular sieves (200 mg) at  $-78$  °C under  $N_2$  atmosphere. The mixture was stirred at same temperature for 2 h.  $Et_3SiH$  (27  $\mu$ L, 166  $\mu$ mol), benzaldehyde (16  $\mu$ L, 160  $\mu$ mol) and TMSOTf (4  $\mu$ L, 23  $\mu$ mol) were sequentially added to the reaction solution. After 2.5 h of stirring at  $-78$  °C, a solution of the glycosyl donor **22** (176 mg, 176  $\mu$ mol) in  $CH_2Cl_2$  (3.5 ml), NIS (61 mg, 270  $\mu$ mol), AW-300 molecular sieves (300 mg) and TfOH (3  $\mu$ L, 35  $\mu$ mol) were sequentially added to the solution at  $-78$  °C. The reaction temperature was gradually raised to  $-40$  °C for a period of 3 h. Then, a solution of the glycerate **31** (97 mg, 270  $\mu$ mol) in  $CH_2Cl_2$  (1.5 ml), NIS (34 mg, 146  $\mu$ mol) and TfOH (7  $\mu$ L, 75  $\mu$ mol) were sequentially added to the mixture at  $-40$  °C, and the reaction temperature was gradually raised to 0 °C for a period of 2 h. Saturated  $NaHCO_{3(aq)}$  (5 mL) and 10%  $Na_2S_2O_{3(aq)}$  (5 mL) were added to quench the reaction. The mixture was filtered through Celite, followed by extraction with  $CH_2Cl_2$ . The combined organic layer was dried over anhydrous  $MgSO_4$ , filtered and concentrated under reduced pressure. Purification of the residue

via flash column chromatography (ethyl acetate/hexanes = 1/6) delivered the MMG backbone **32** (70 mg, 34%).  $[\alpha]_D^{24} +24.4$  (*c* 3.1 in  $\text{CHCl}_3$ ); IR (thin film):  $\delta$  2930, 2857, 1752, 1427, 1112, 1044, 737, 698  $\text{cm}^{-1}$ ;  $^1\text{H}$  NMR (600 MHz,  $\text{CDCl}_3$ ):  $\delta$  7.79–7.70 (8 H, m, Ar-H), 7.48–7.46 (4 H, m, Ar-H), 7.43–7.35 (11 H, m, Ar-H), 7.33–7.25 (13 H, m, Ar-H), 7.24–7.18 (6 H, m, Ar-H), 7.11–7.09 (1 H, m, Ar-H), 7.03–7.01 (2 H, m, Ar-H), 5.59 (1 H, s, 1'-H), 5.49 (1 H, s, ArCH), 5.35 (1 H, s, 1-H), 4.99 (1 H, d, *J* 11.1, ArCH<sub>2</sub>), 4.90 (1 H, d, *J* 12.2, ArCH<sub>2</sub>), 4.85 (1 H, d, *J* 12.2, ArCH<sub>2</sub>), 4.78 (1 H, d, *J* 10.9, ArCH<sub>2</sub>), 4.74 (1 H, d, *J* 10.9, ArCH<sub>2</sub>), 4.63 (1 H, d, *J* 11.1, ArCH<sub>2</sub>), 4.54–4.48 (3 H, m, glycerate-CH, ArCH<sub>2</sub>), 4.20 (1 H, dd, *J* 10.3, 4.8, 6-H<sub>a</sub>), 4.16–4.15 (5 H, m, 2'-H, 3'-H, 4'-H, 5-H, glycerate-CH<sub>2</sub>), 4.04–4.03 (2 H, m, 2-H, 3-H), 4.00 (1 H, dd, *J* 10.8, 2.4, glycerate-CH<sub>2</sub>), 3.91–3.84 (3 H, m, 5-H, 6'-H × 2), 3.77 (3 H, s, OCH<sub>3</sub>), 3.68 (1 H, t, *J* 10.3, 6-H<sub>b</sub>), 3.60 (1 H, t, *J* 8.9, 4-H), 1.07–1.06 (18 H, m, *t*-Bu);  $^{13}\text{C}$  NMR (150 MHz,  $\text{CDCl}_3$ ):  $\delta$  170.0 (C), 139.14 (C), 139.11 (C), 138.6 (C), 138.3 (C), 137.4 (C), 135.9 (CH), 135.7 (CH), 135.5 (CH), 133.9 (C), 133.6 (C), 133.1 (C), 132.8 (C), 129.8 (CH), 129.4 (CH), 129.3 (CH), 128.8 (CH), 128.2 (CH), 128.1 (CH), 128.09 (CH), 128.06 (CH), 128.04 (CH), 127.8 (CH), 127.79 (CH), 127.75 (CH), 127.6 (CH), 127.5 (CH), 127.45 (CH), 127.43 (CH), 127.3 (CH), 127.2 (CH), 127.1 (CH), 127.0 (CH), 126.0 (CH), 101.3 (CH), 94.5 (CH), 93.9 (CH), 81.9 (CH), 80.1 (CH), 75.4 (CH<sub>2</sub>), 75.2 (CH), 74.9 (CH<sub>2</sub>), 74.6 (CH), 74.3 (CH), 73.0 (CH), 72.4 (CH), 72.3 (CH<sub>2</sub>), 71.5 (CH<sub>2</sub>), 68.8 (CH<sub>2</sub>), 64.9 (CH<sub>2</sub>), 63.3 (CH<sub>2</sub>), 62.8 (CH), 51.9 (CH<sub>3</sub>), 26.9 (CH<sub>3</sub>), 26.7 (CH<sub>3</sub>), 19.3 (C), 19.2 (C); HRMS (ESI): *m/z* calcd for  $\text{C}_{83}\text{H}_{92}\text{O}_{14}\text{Si}_2\text{Na}$  ( $[\text{M} + \text{Na}]^+$ ): 1391.5923, found: 1391.5970.

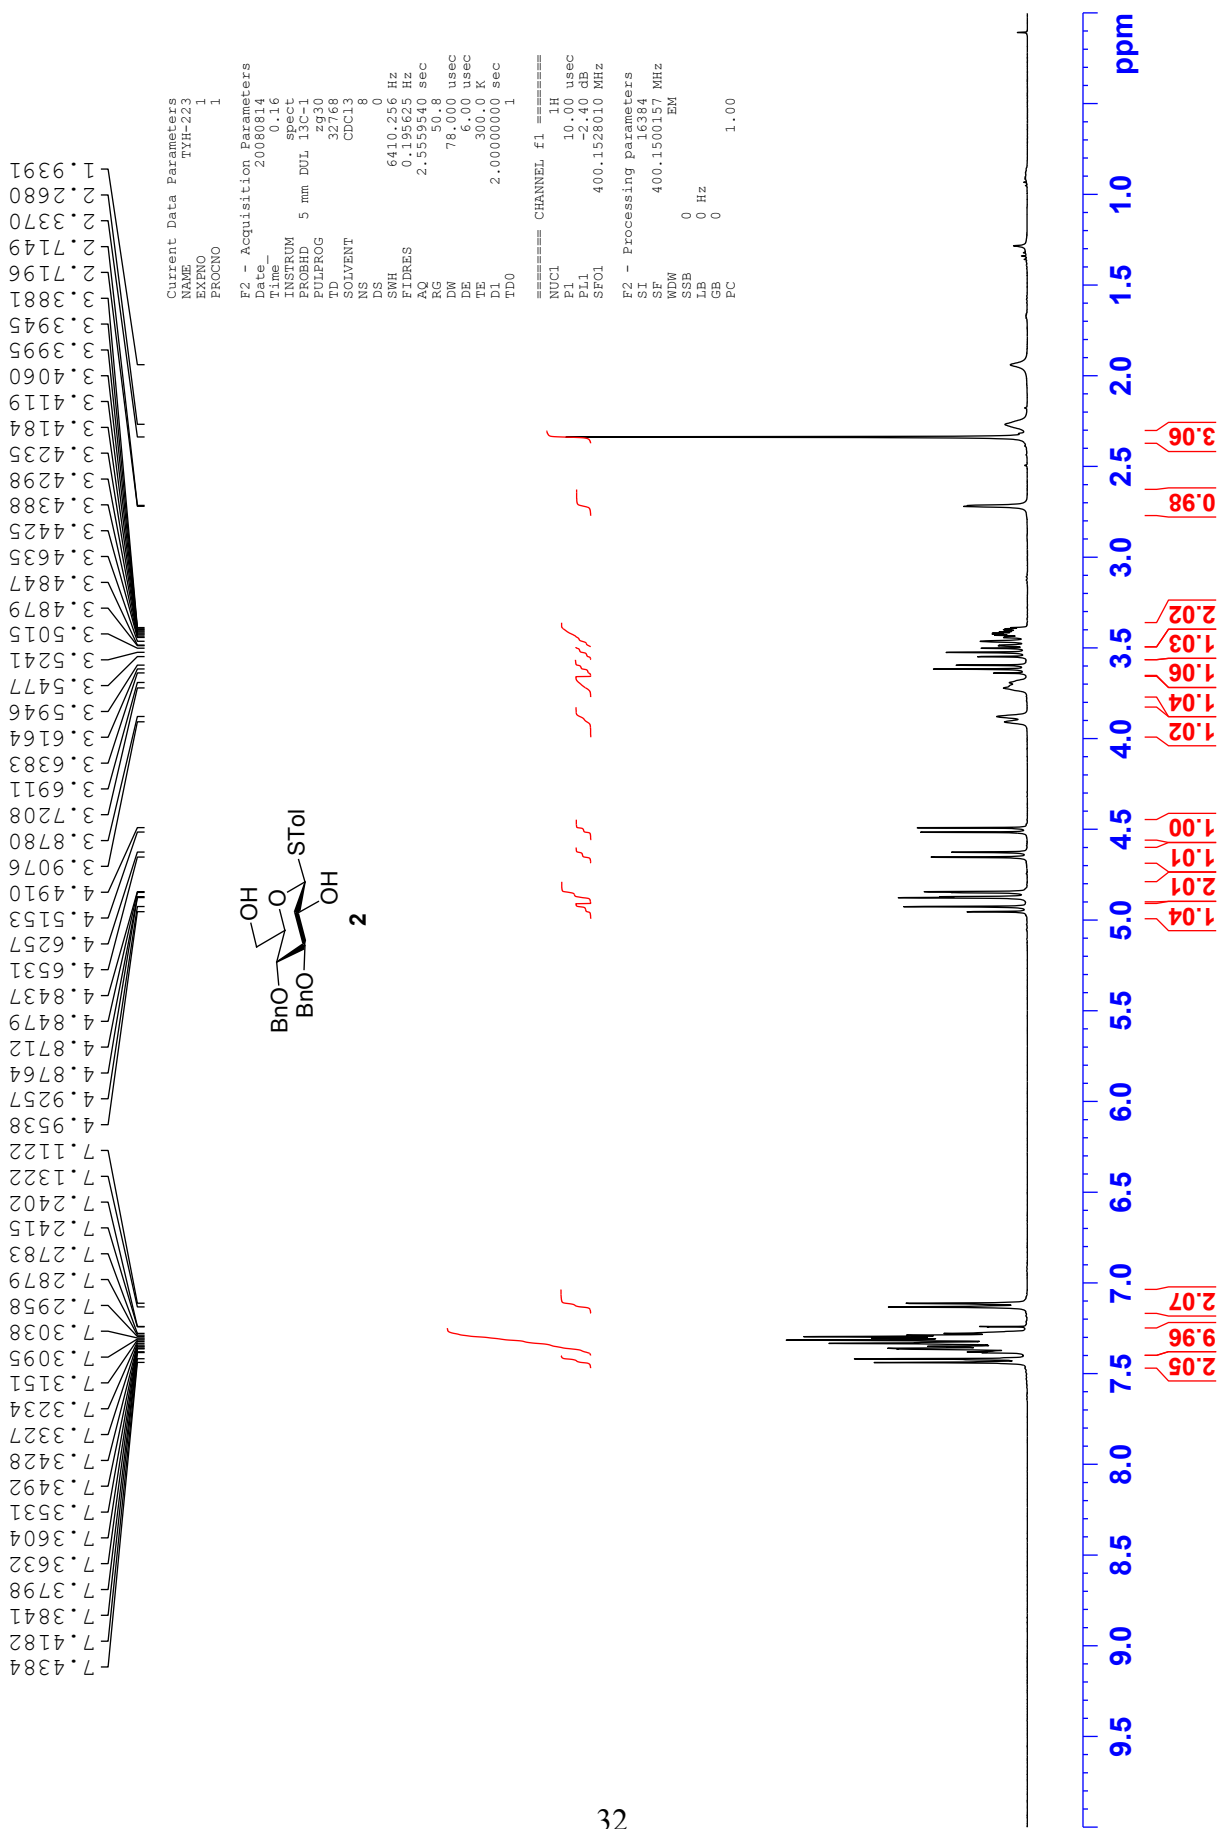



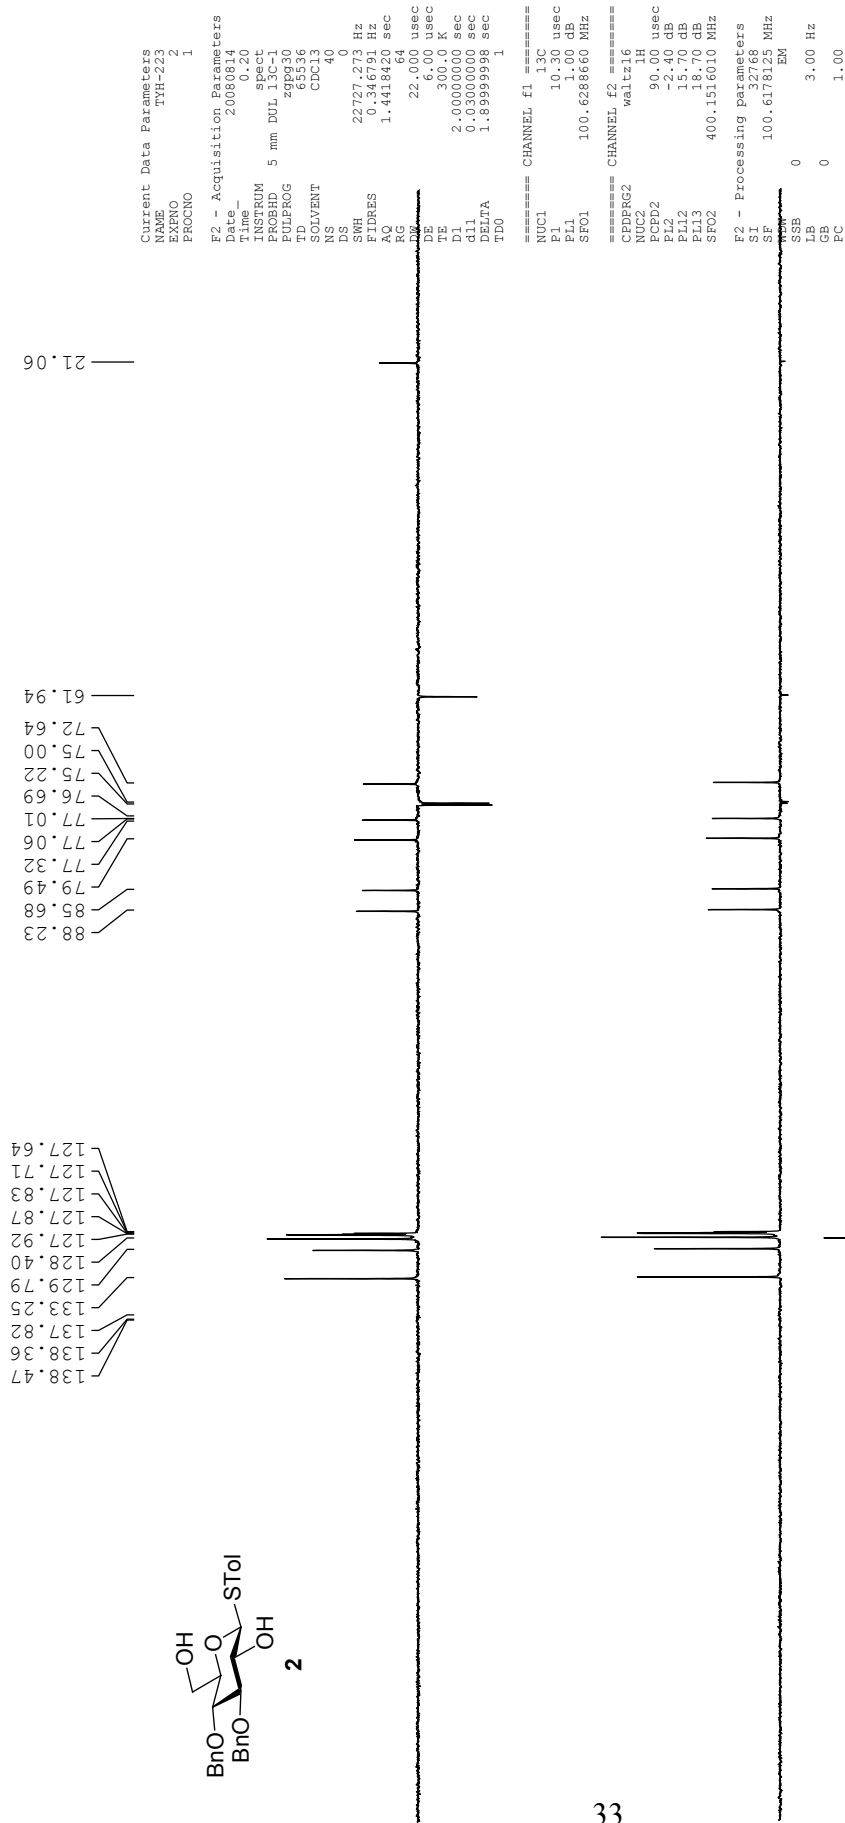

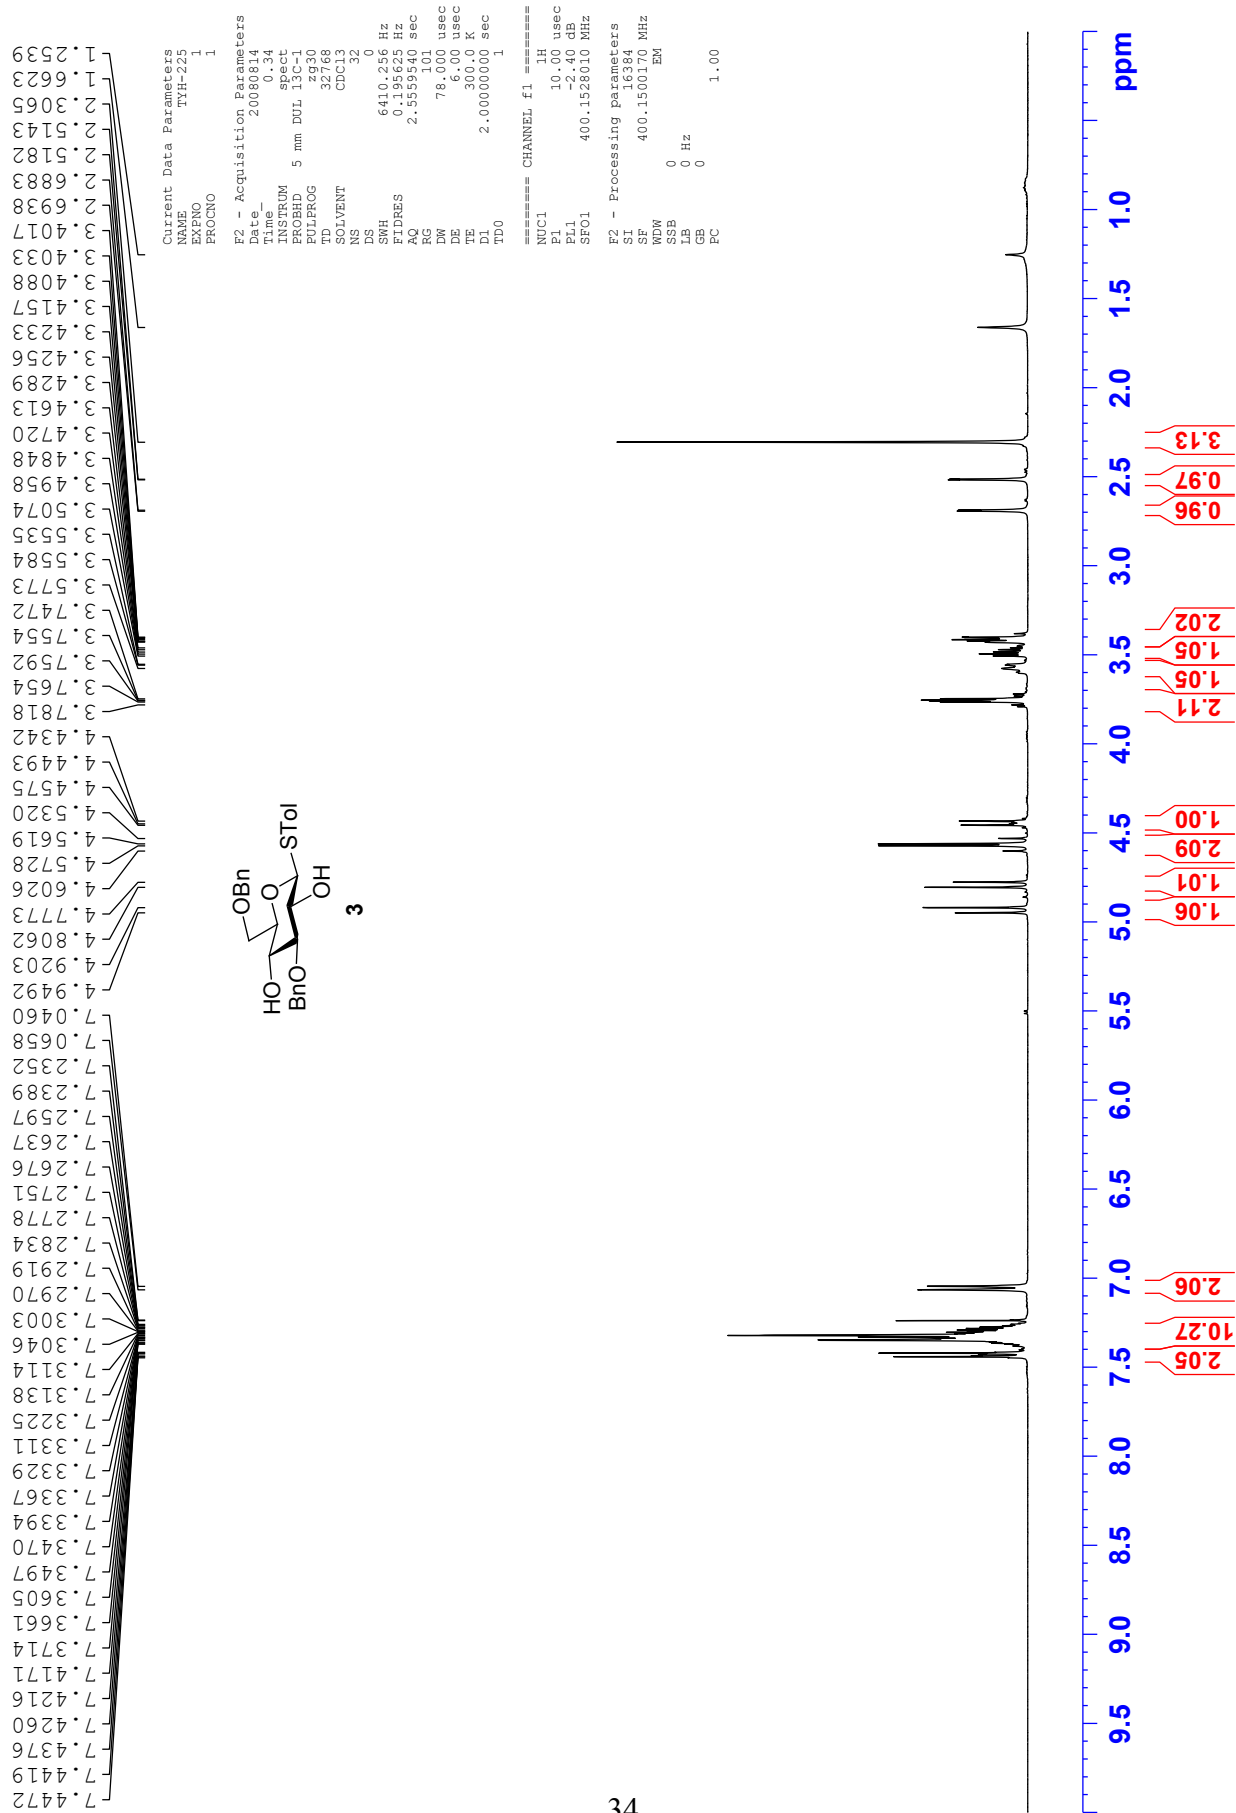

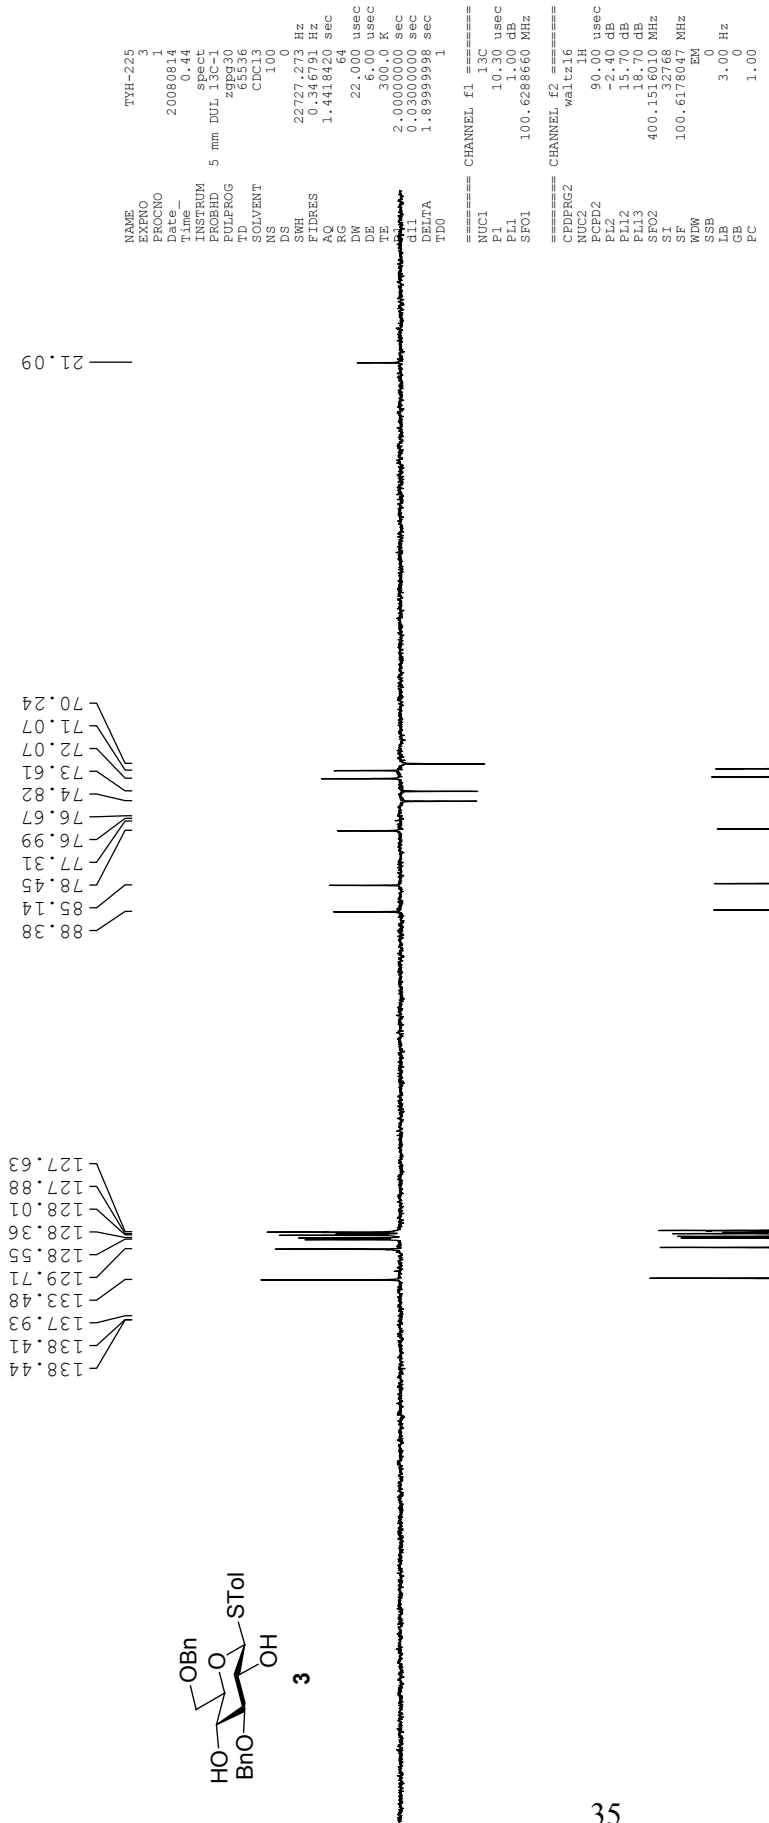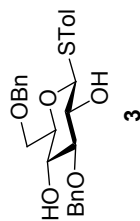

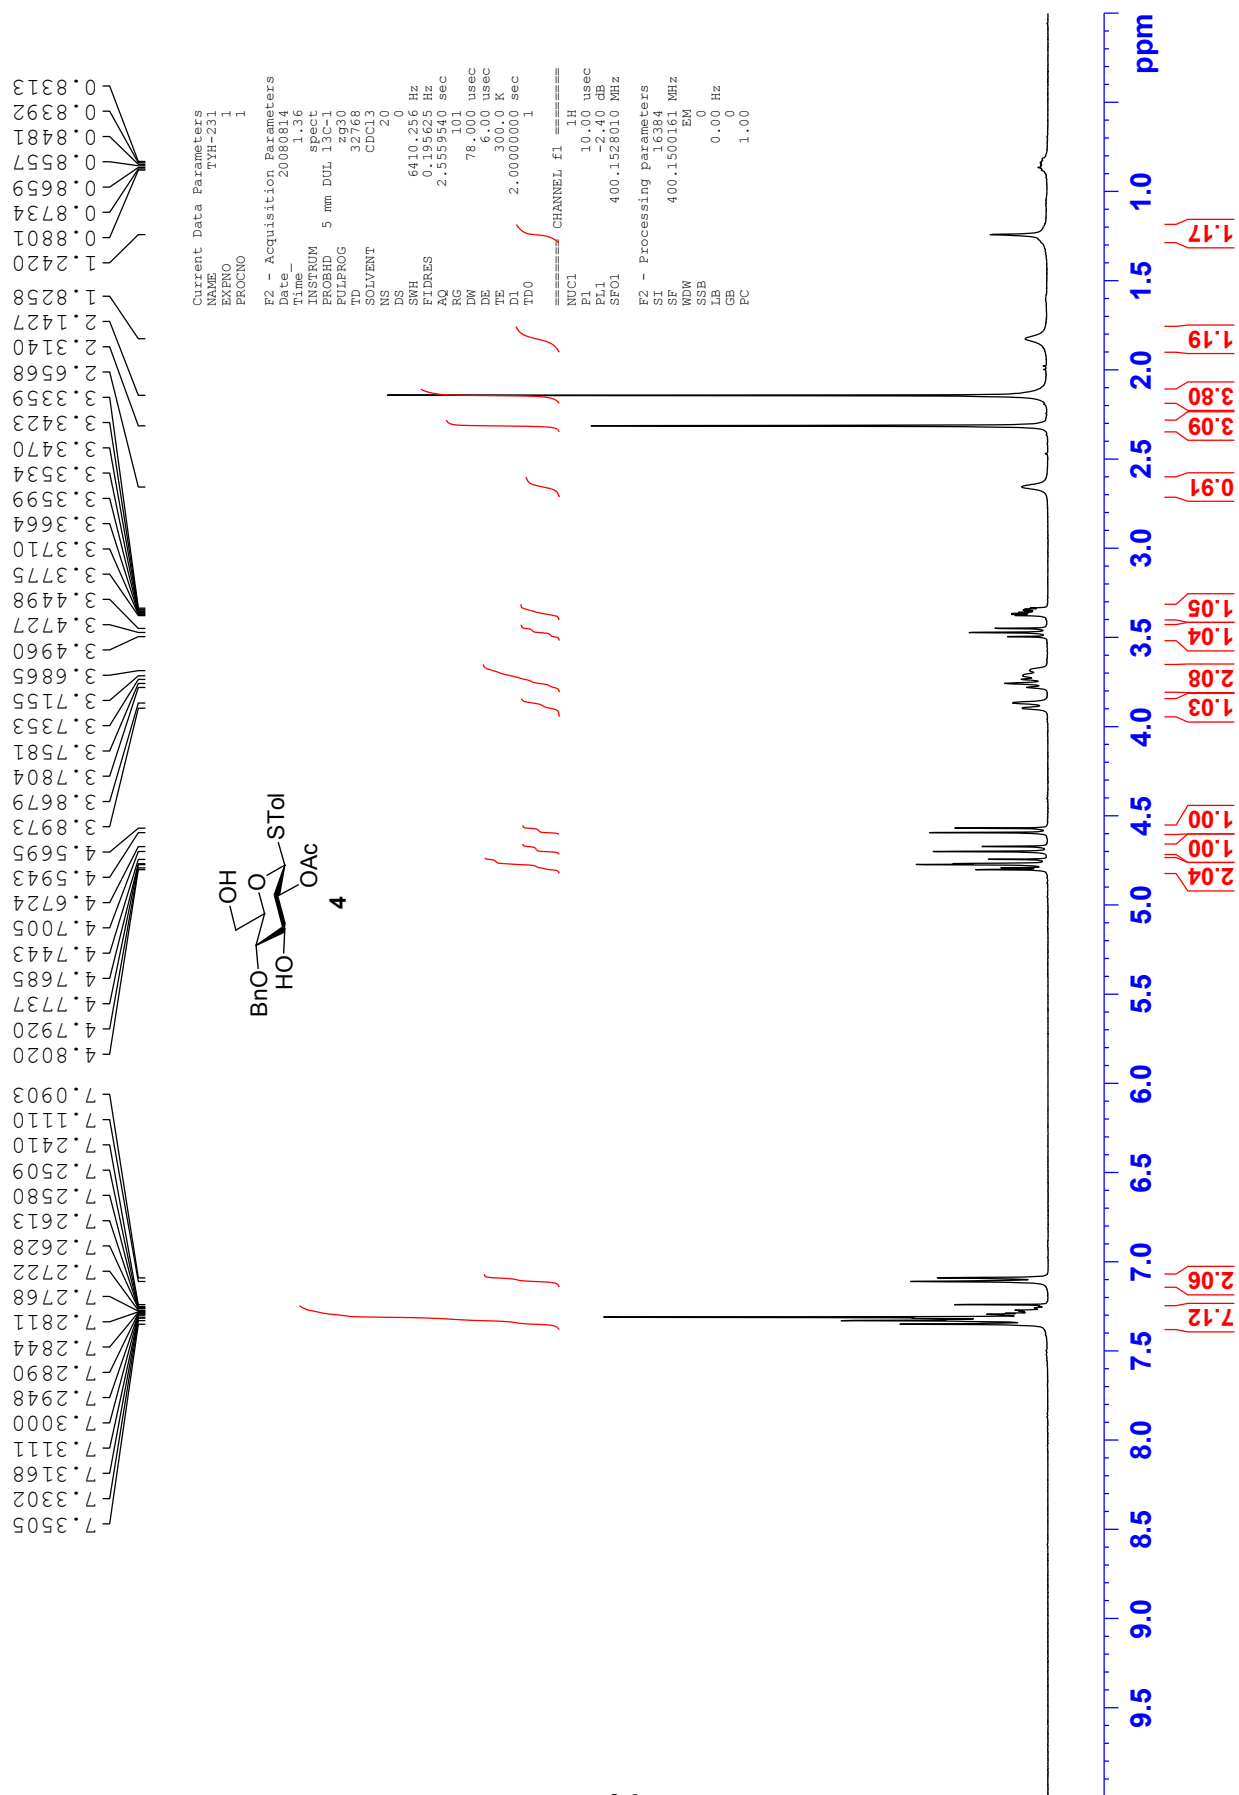

Current Data Parameters  
 NAME IH-231  
 EXNO 2  
 PROCNO 1

F2 - Acquisition Parameters  
 Date\_ 20080814  
 Time\_ 1.39  
 INSTRUM spect  
 PULPROG zgpg30  
 FIDRES 5 mm DULDC1  
 TD 65536  
 TD0 1  
 SOLVENT CDC13  
 NS 100  
 DS 0  
 SWH 22727.273 Hz  
 FIDRES 0.346791 Hz  
 AQ 1.4418420 sec  
 RG 327.680  
 DG 22.000 usec  
 TE 300.0 K  
 D1 2.00000000 sec  
 d11 0.03000000 sec  
 DELTA 1.89999998 sec  
 TD0 1

===== CHANNEL f1 =====  
 NUC1 13C  
 P1 10.30 usec  
 PL1 1.00 dB  
 SFO1 100.6288660 MHz

===== CHANNEL f2 =====  
 CPDPRG2 waltz16  
 NUC2 1H  
 PCPD2 90.00 usec  
 PL2 -2.40 dB  
 PL12 15.70 dB  
 PL13 18.70 dB  
 SFO2 400.1516010 MHz

F2 - Processing parameters  
 SI 32768  
 SF 100.6176093 MHz  
 SSB 0  
 LB 3.00 Hz  
 GB 0  
 PC 1.00

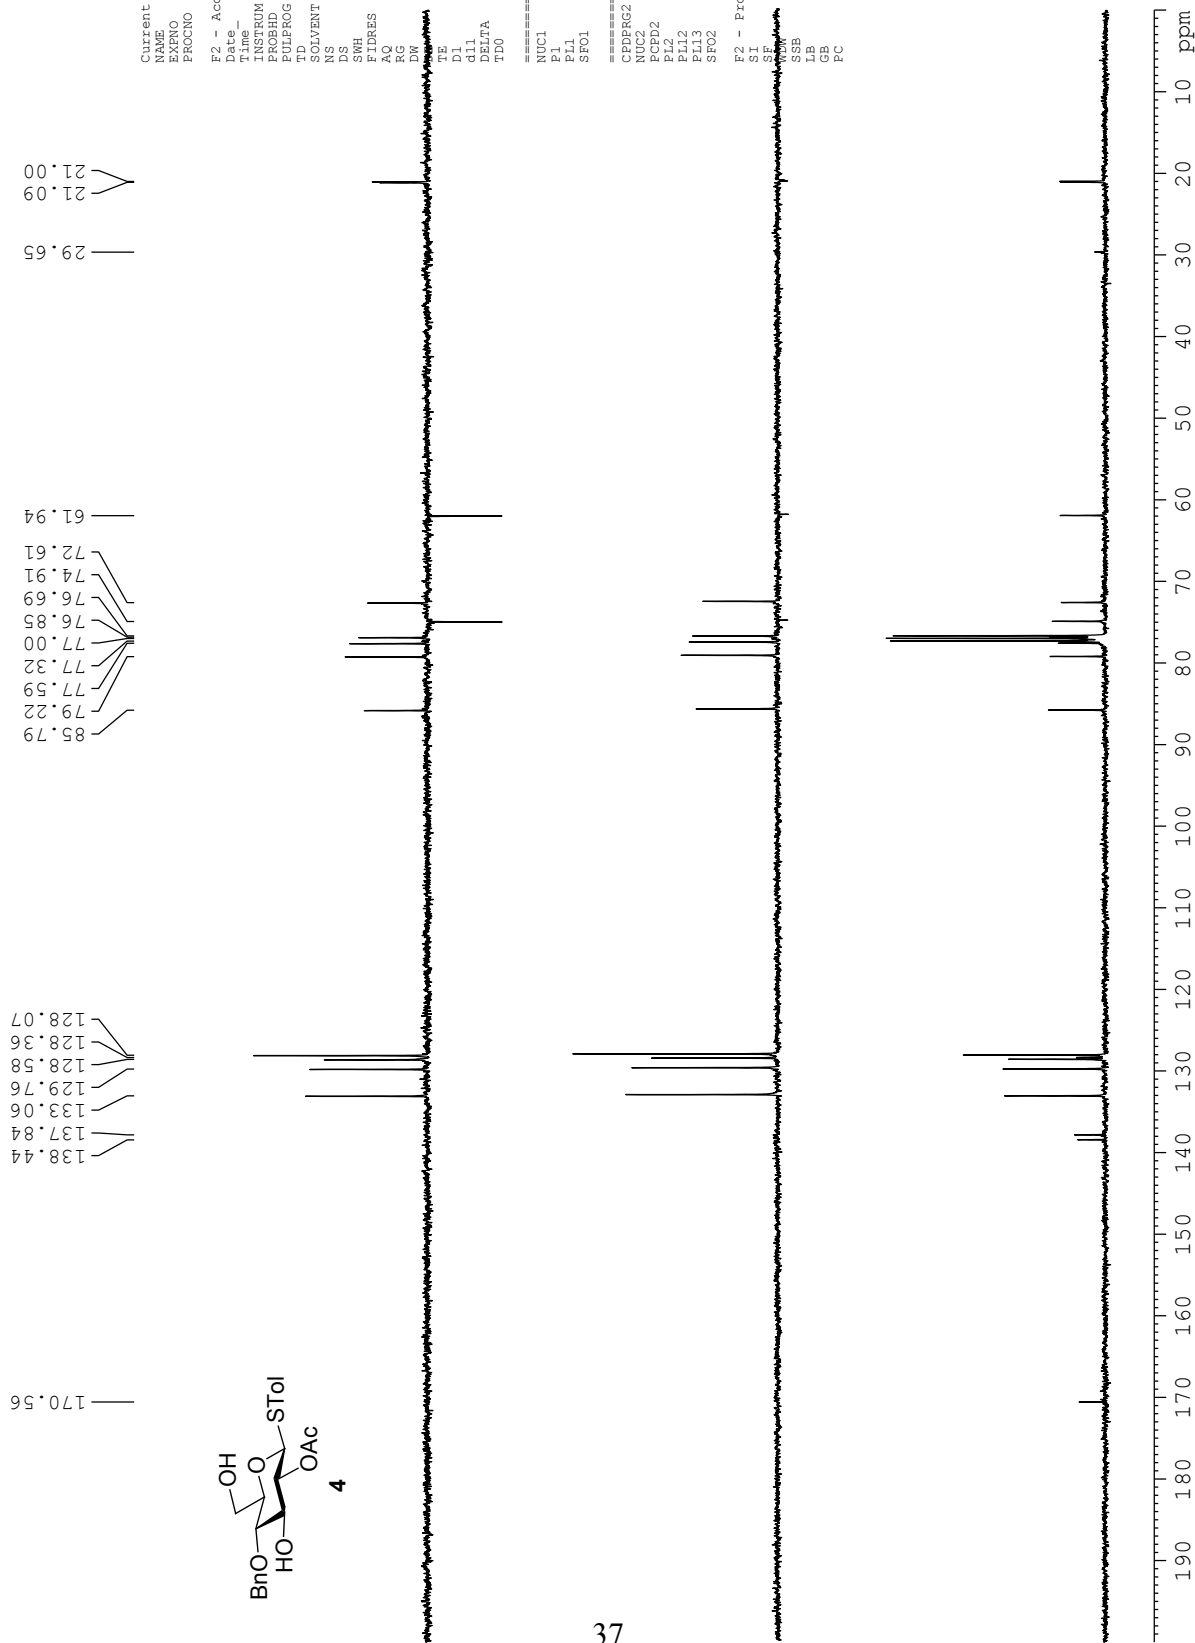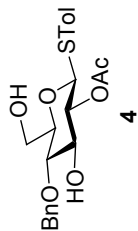

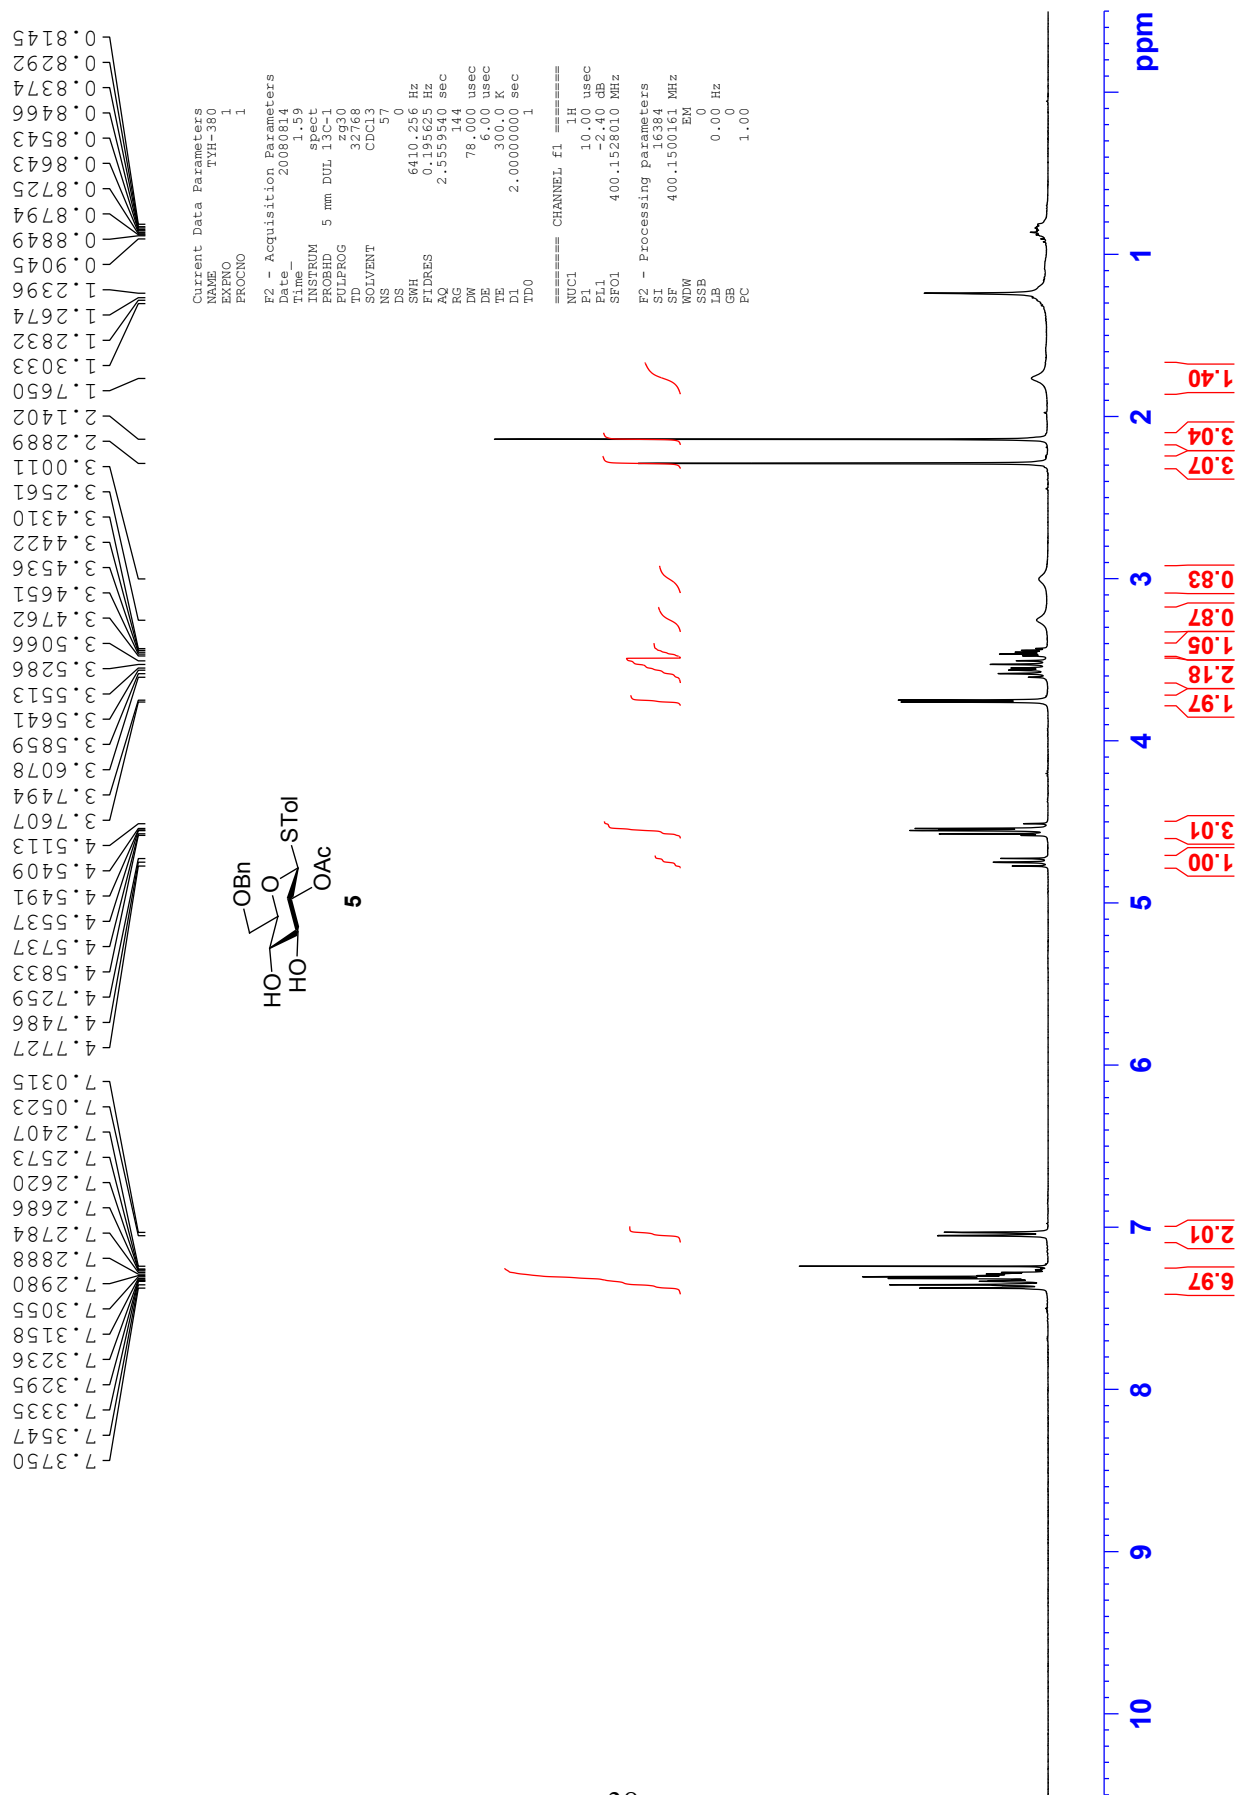

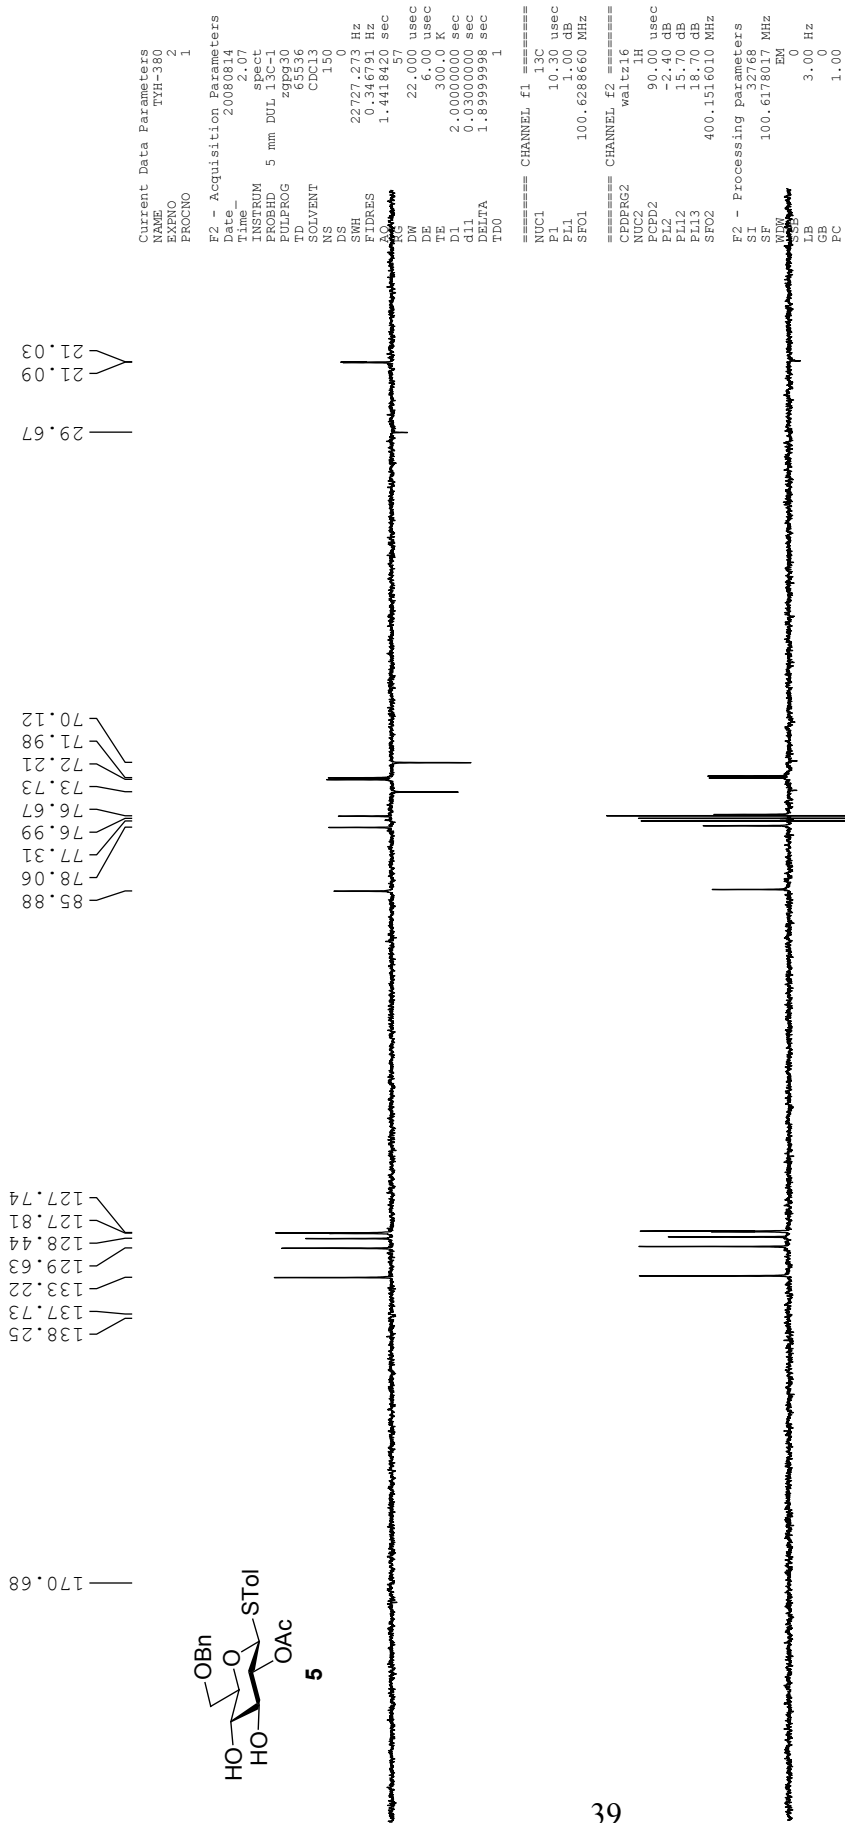

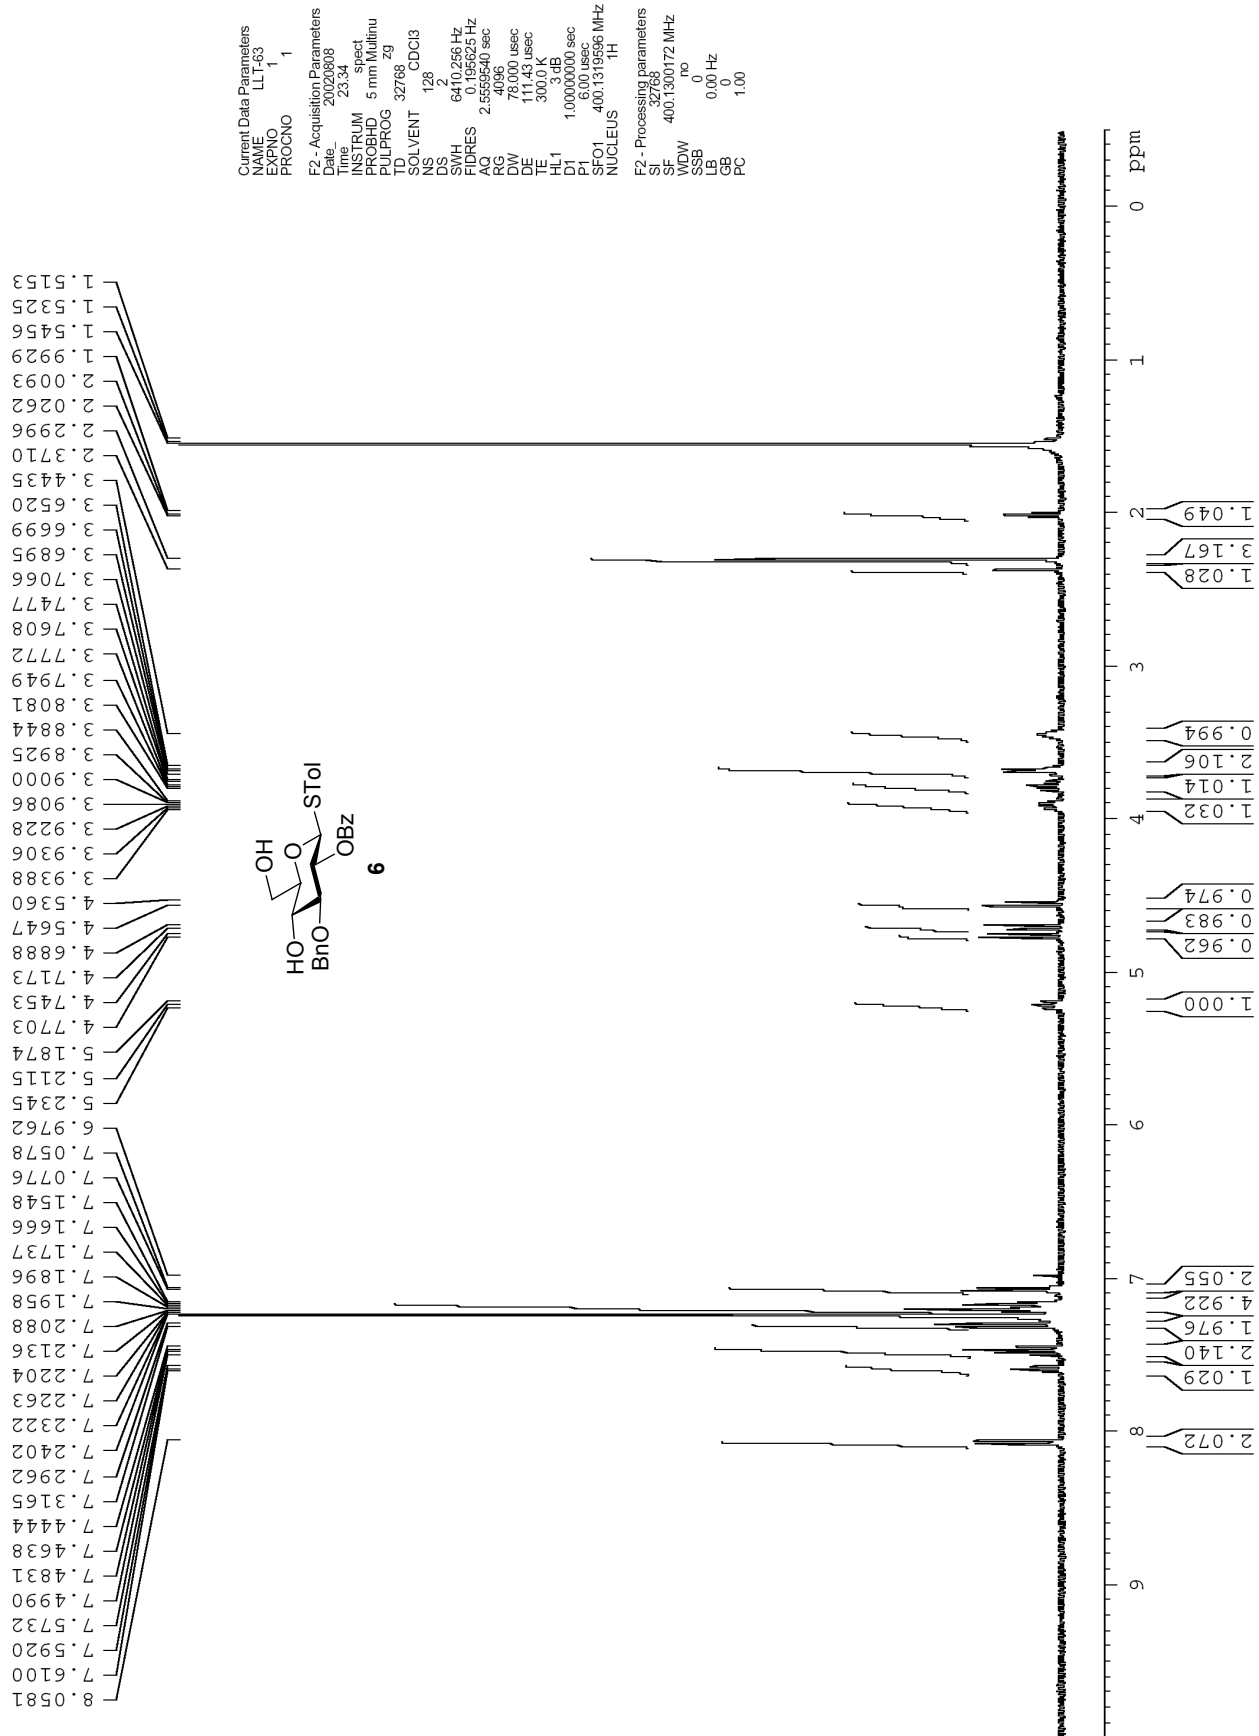



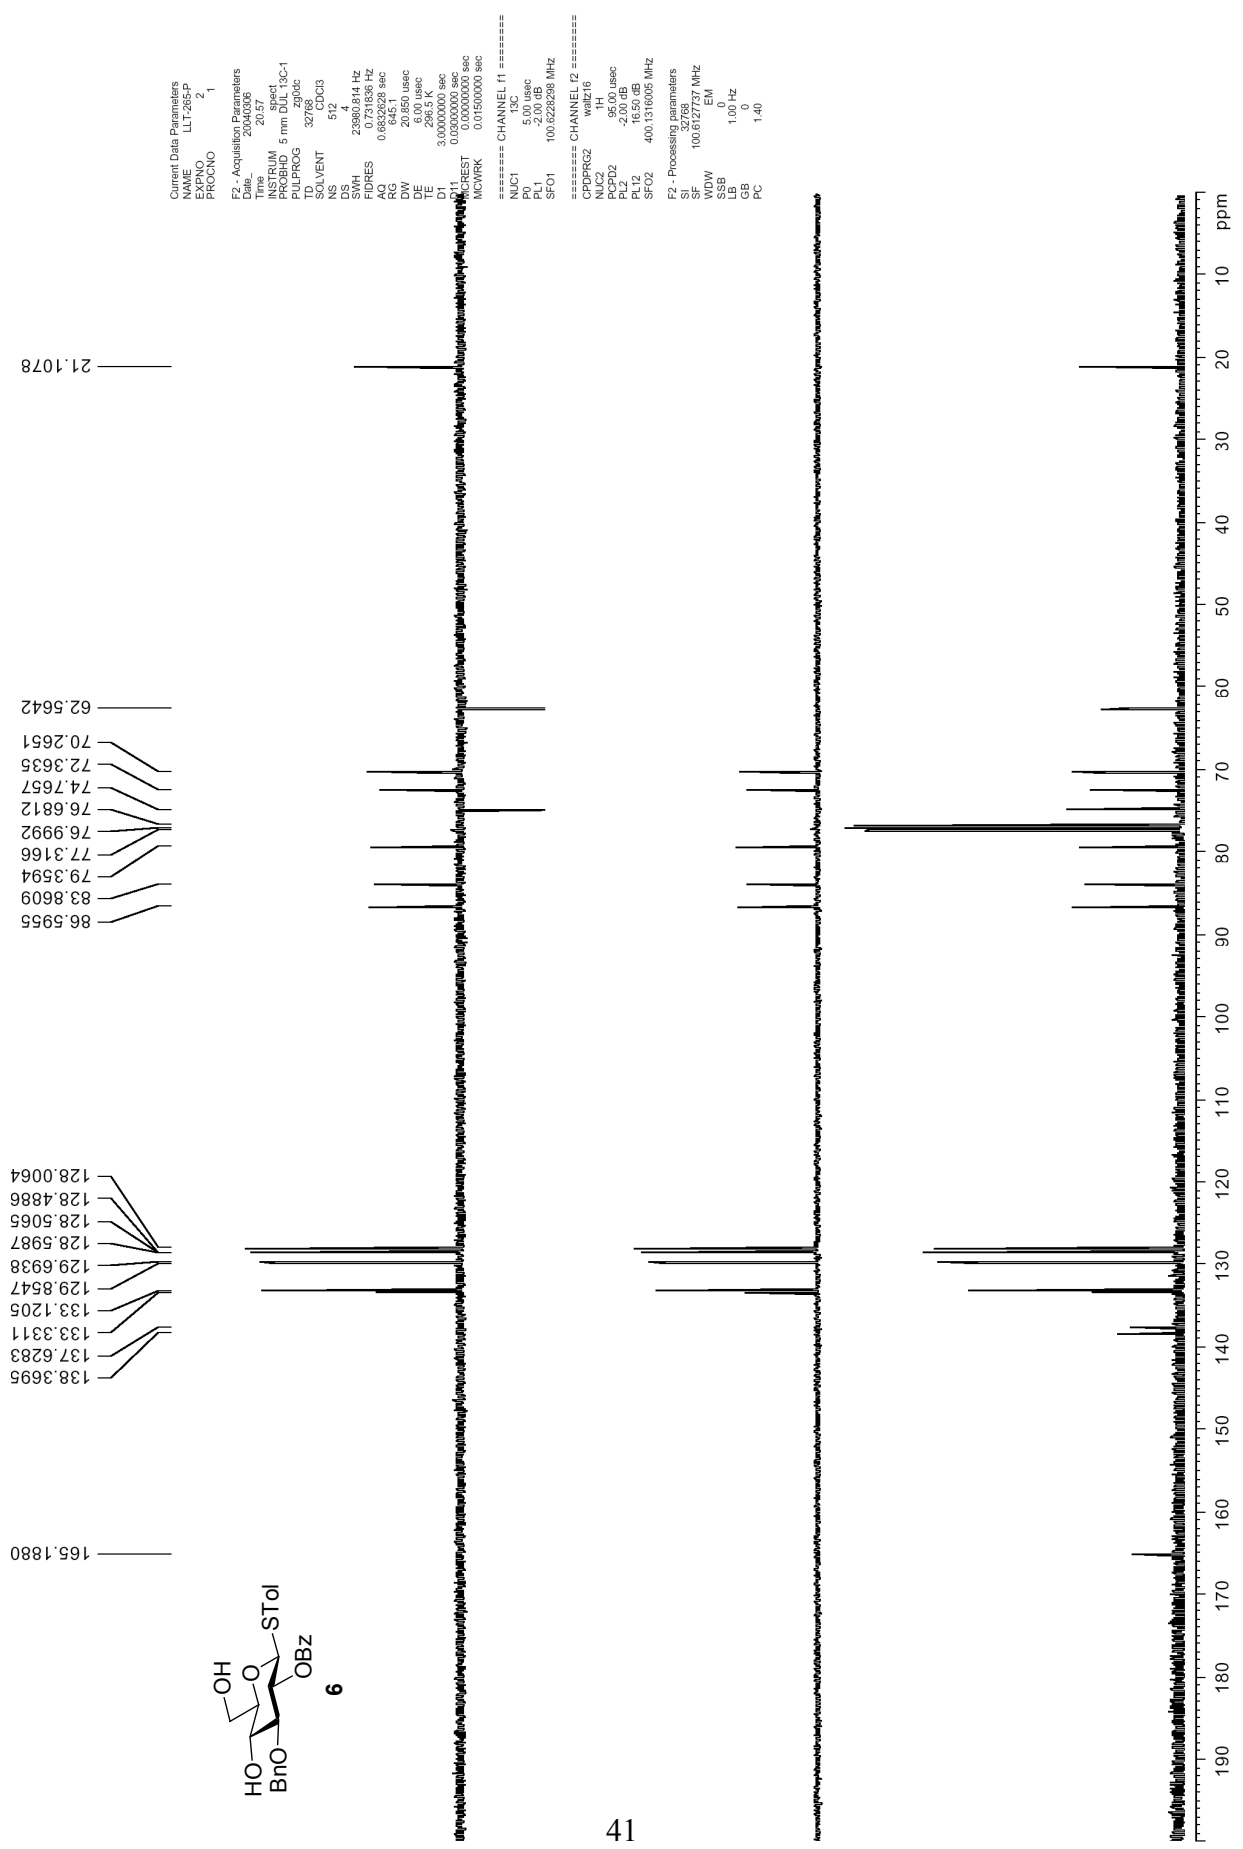

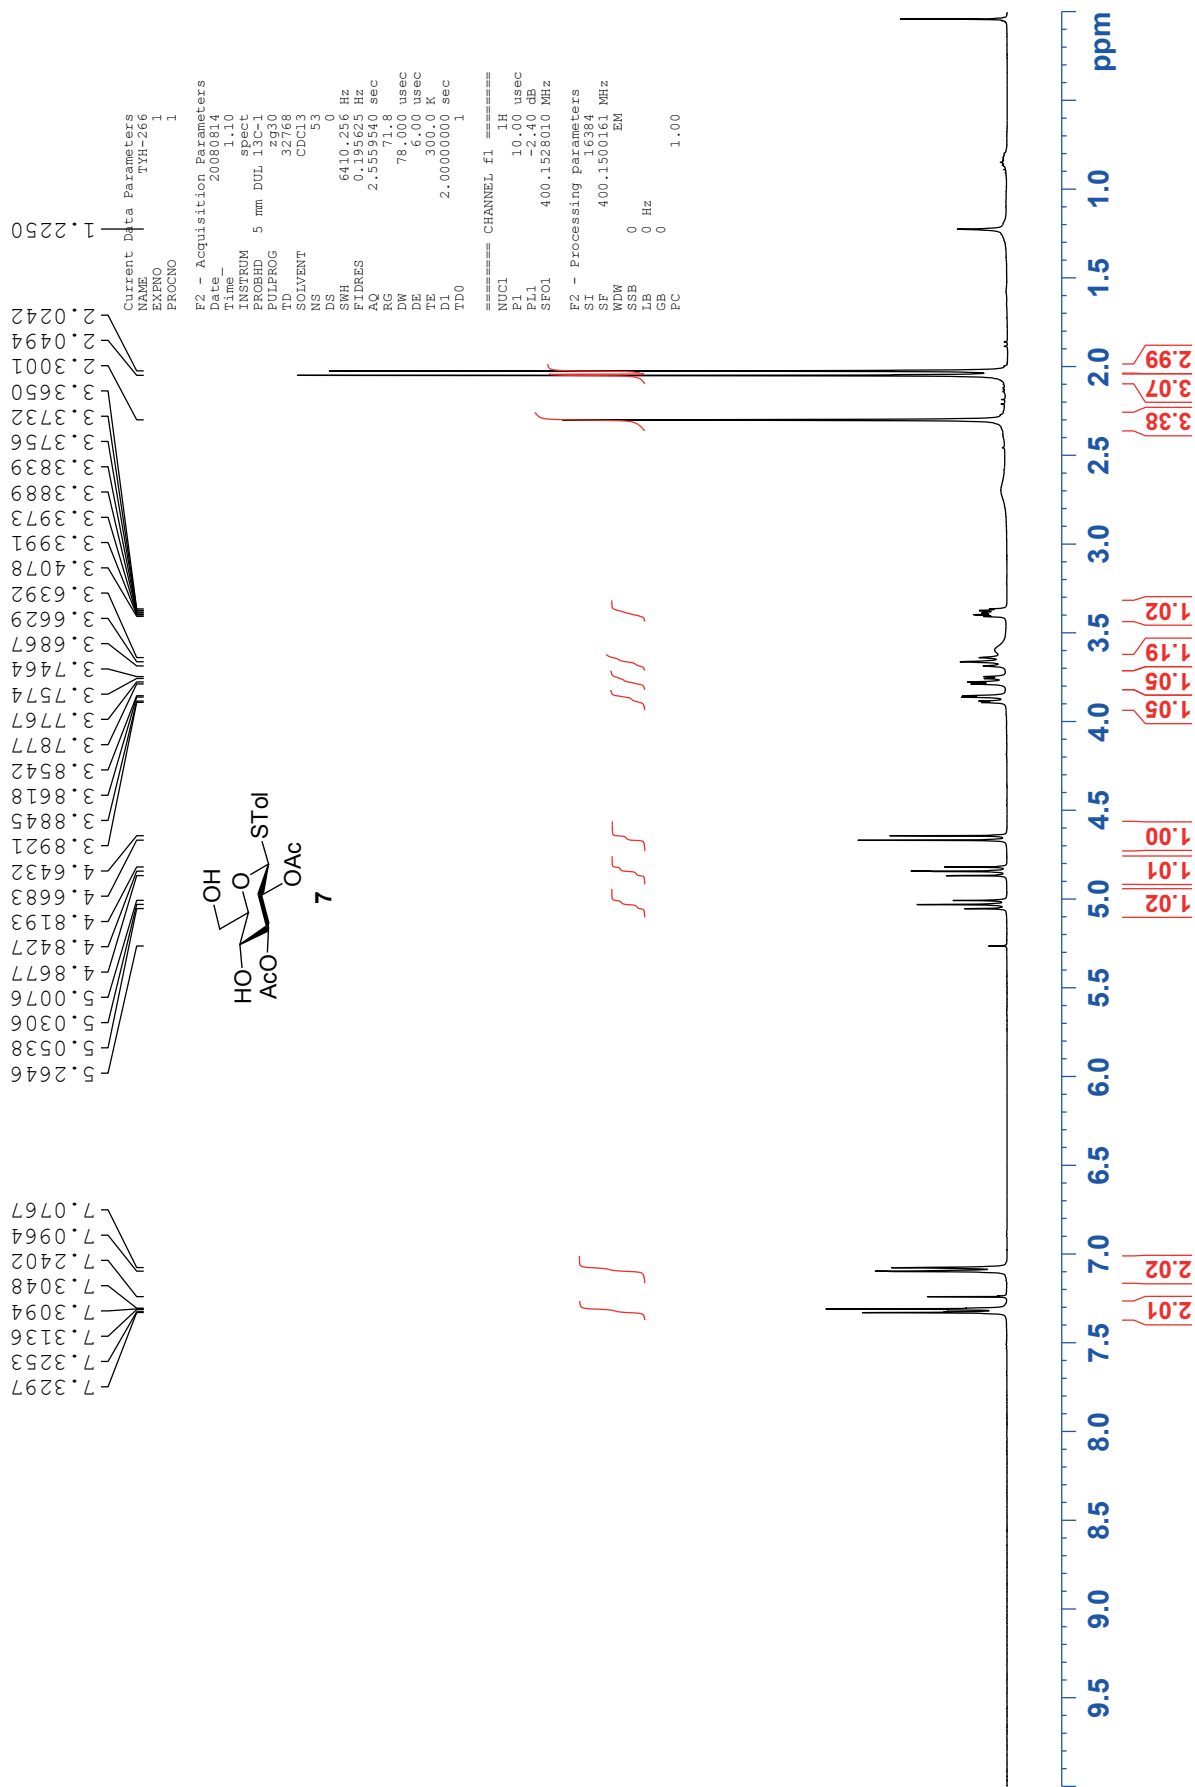

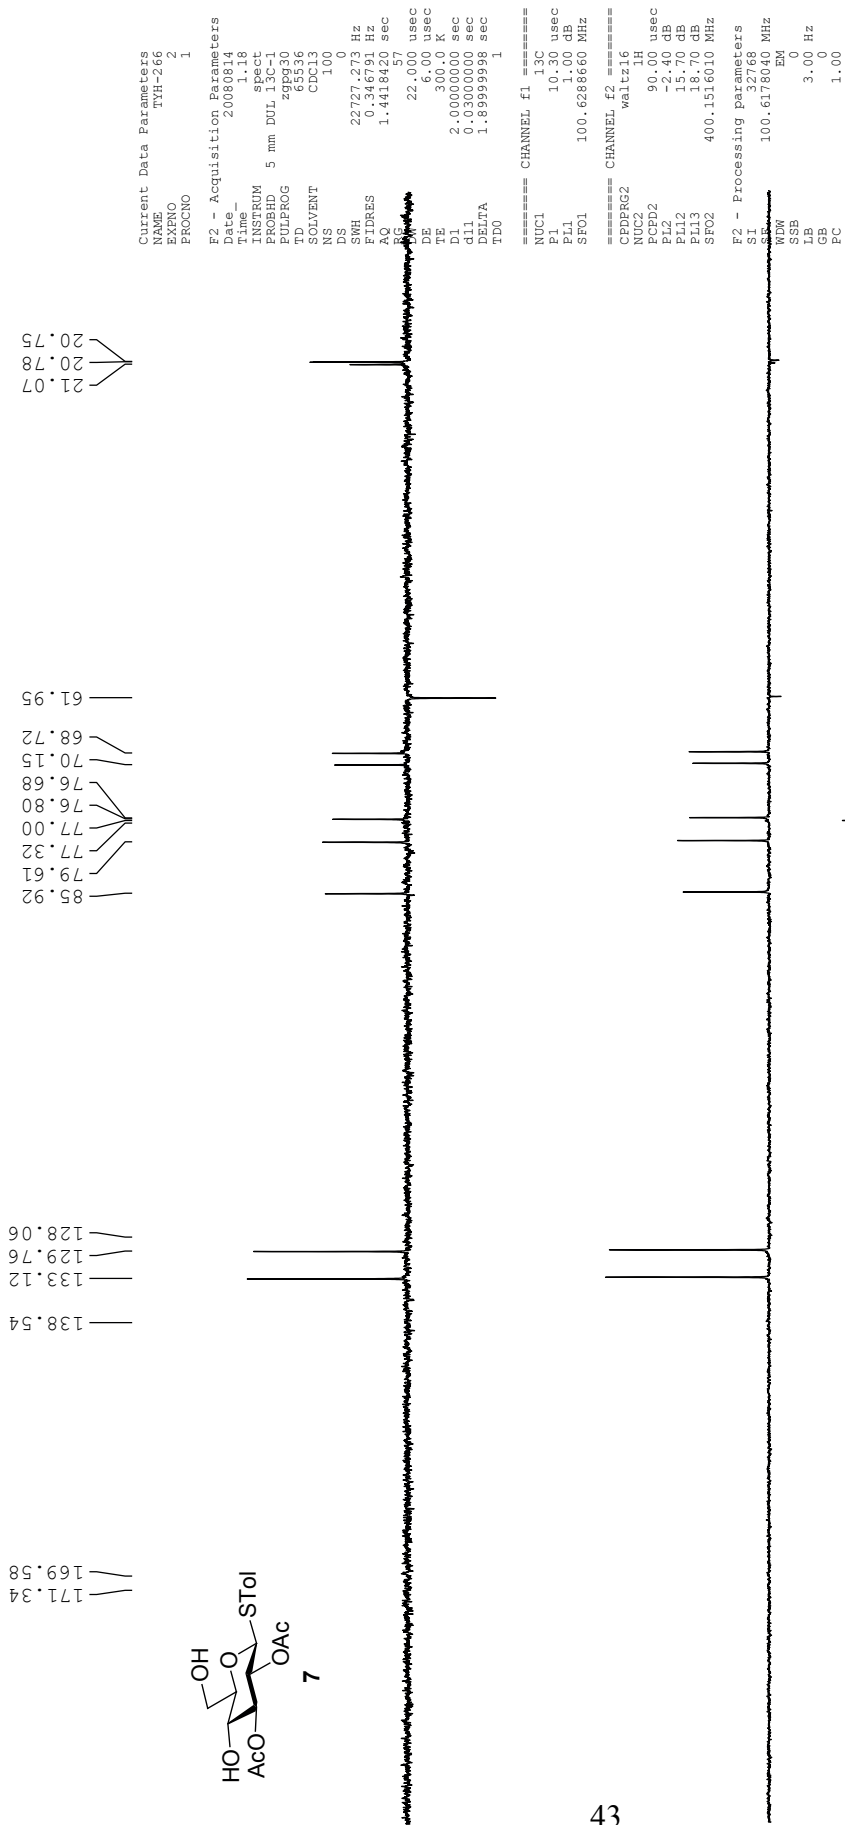

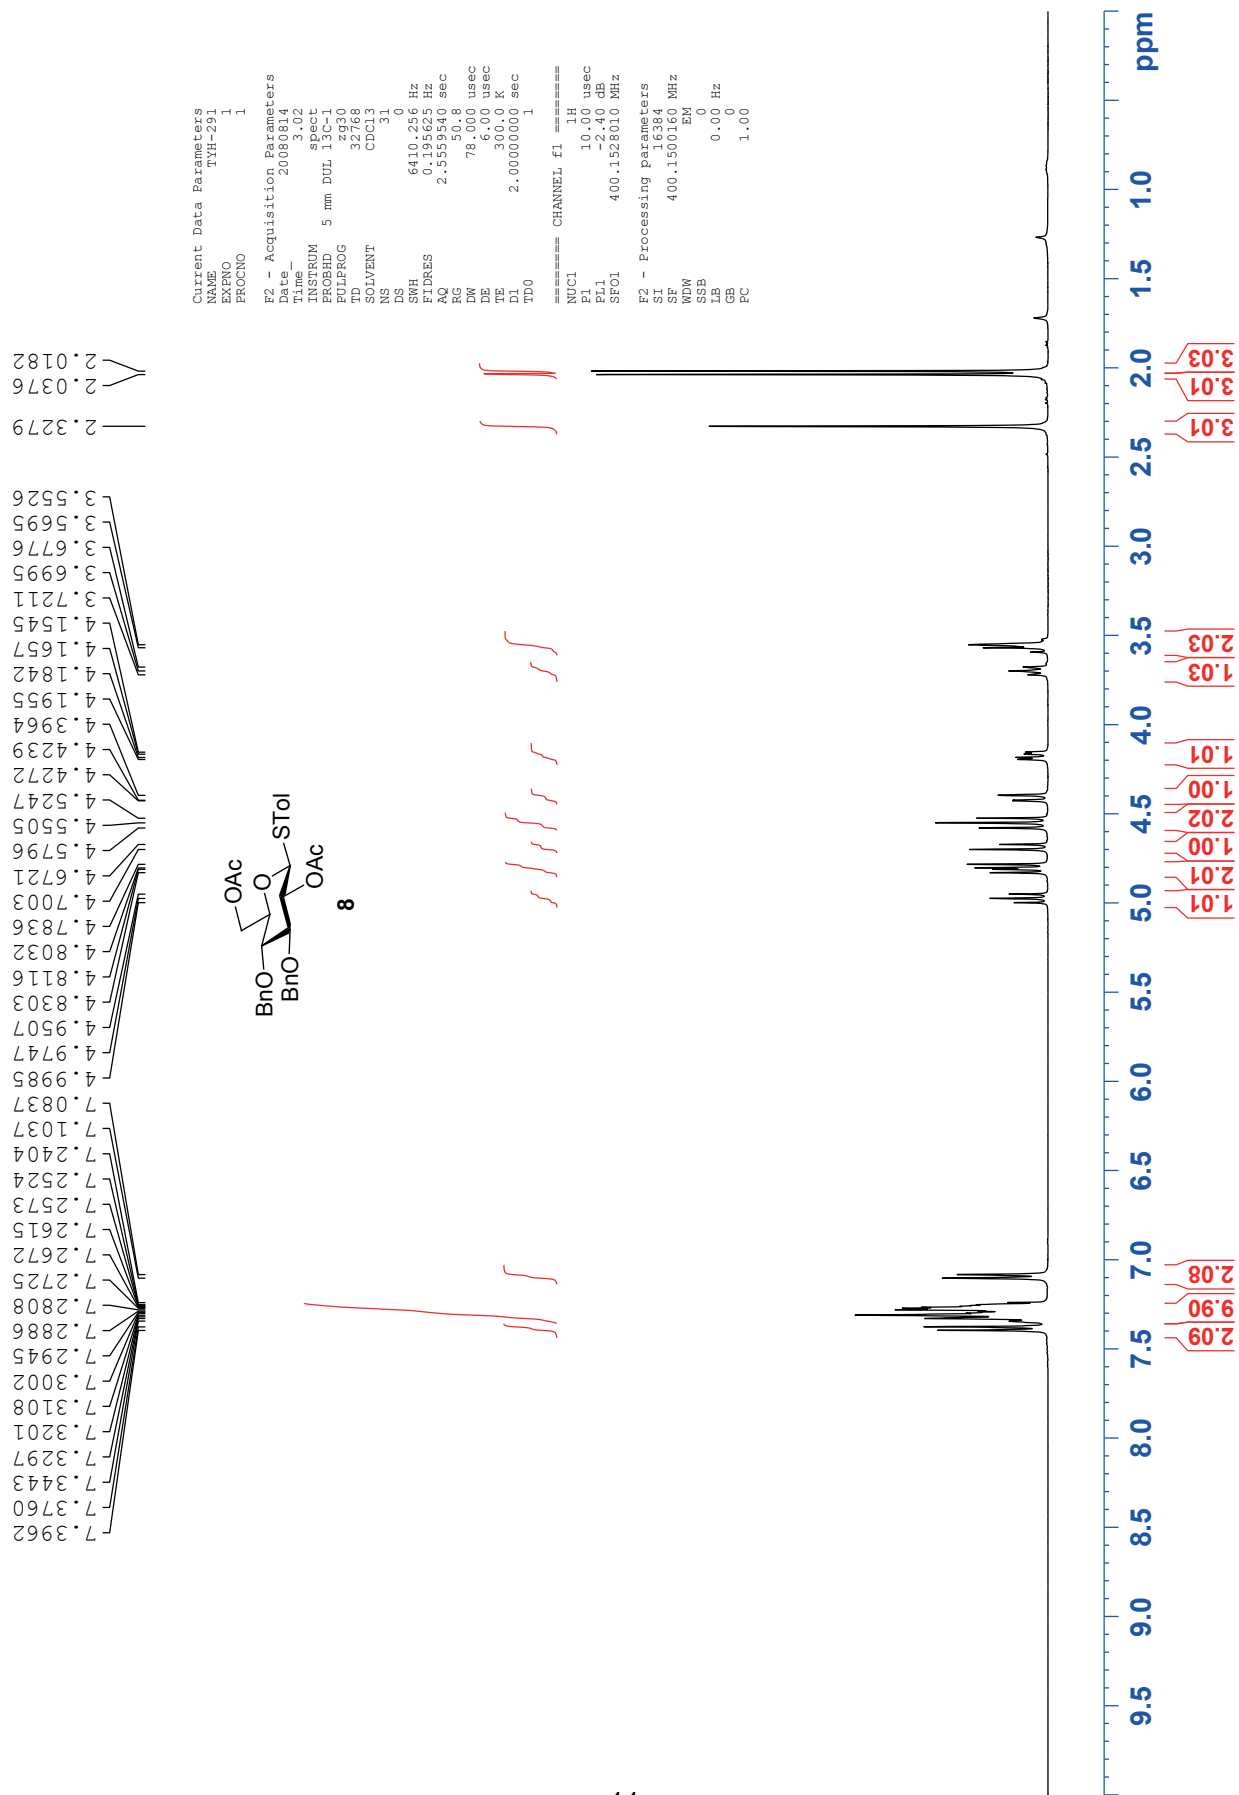

Current Data Parameters  
 NAME 1H-291  
 EXNO 2  
 PROCNO 1

F2 - Acquisition Parameters  
 Date\_ 20080814  
 Time\_ 3.07  
 INSTRUM spect  
 PULPROG zgpg30  
 F2 - Processing parameters  
 SI 127.61 MHz  
 SF 100.6178157 MHz

F2 - Acquisition Parameters  
 Date\_ 20080814  
 Time\_ 3.07  
 INSTRUM spect  
 PULPROG zgpg30  
 F2 - Processing parameters  
 SI 127.61 MHz  
 SF 100.6178157 MHz

===== CHANNEL f1 =====  
 NUC1 13C  
 P1 10.30 usec  
 PL1 1.00 dB  
 SFO1 100.6288660 MHz

===== CHANNEL f2 =====  
 CPDPRG2 waltz16  
 NUC2 1H  
 PCPD2 90.00 usec  
 PL2 -2.40 dB  
 PL12 15.70 dB  
 PL13 18.70 dB  
 SFO2 400.1516010 MHz

F2 - Processing parameters  
 SI 127.61 MHz  
 SF 100.6178157 MHz  
 SSB 0  
 LB 3.00 Hz  
 GB 0  
 FC 1.00

21.04  
 20.91  
 20.72

86.03  
 84.38  
 77.32  
 77.00  
 76.92  
 76.68  
 75.28  
 75.00  
 71.61  
 62.83

138.10  
 137.79  
 137.37  
 133.18  
 129.43  
 128.54  
 128.44  
 128.39  
 128.04  
 127.99  
 127.76

170.46  
 169.36

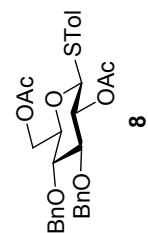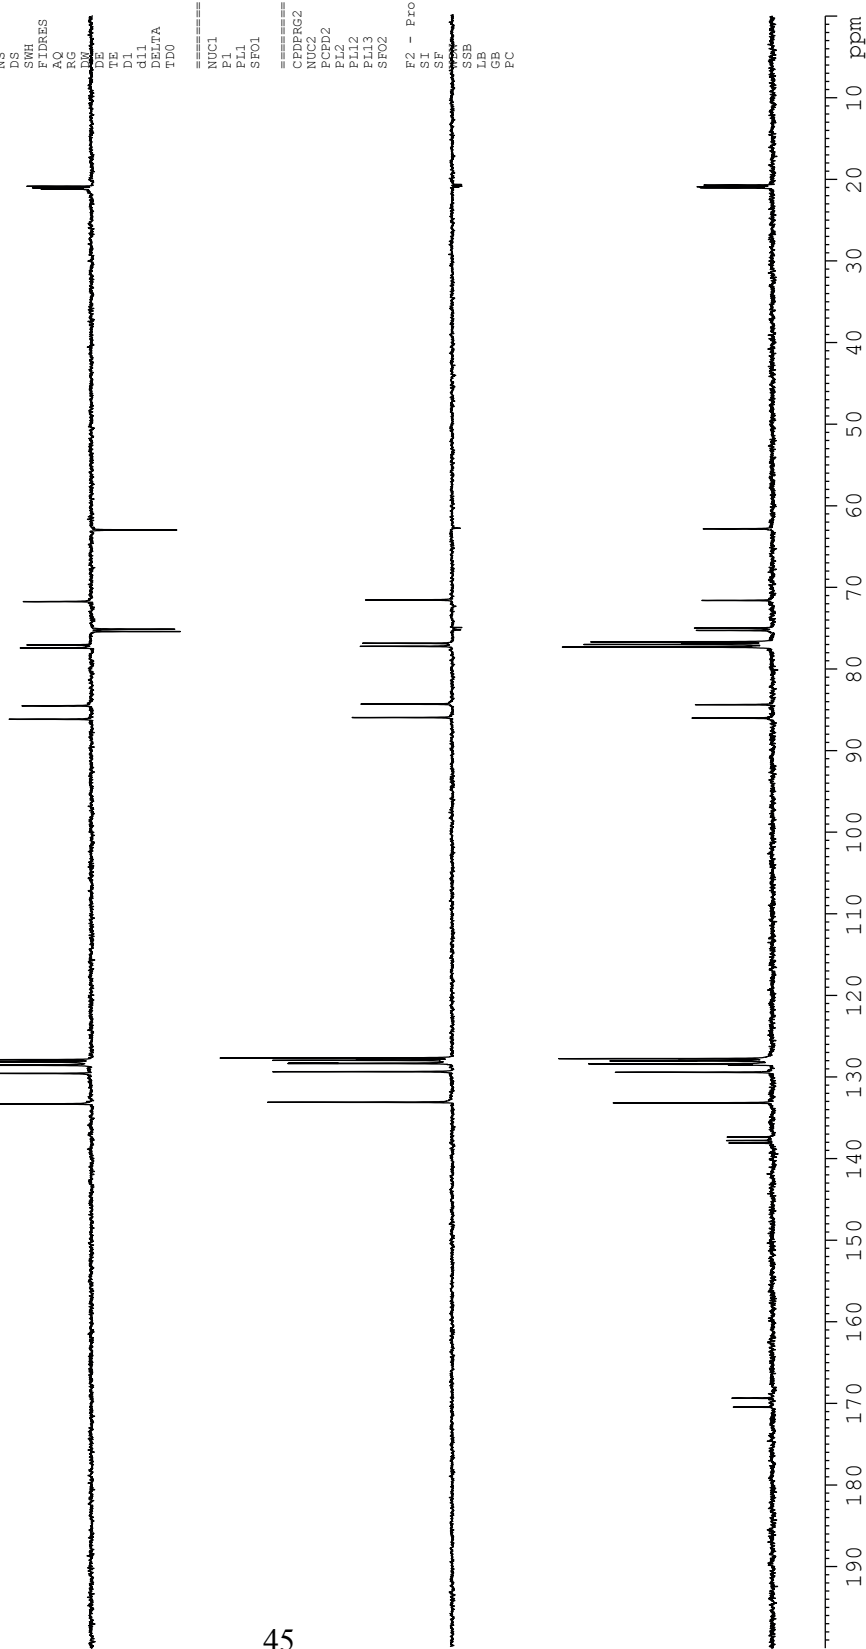

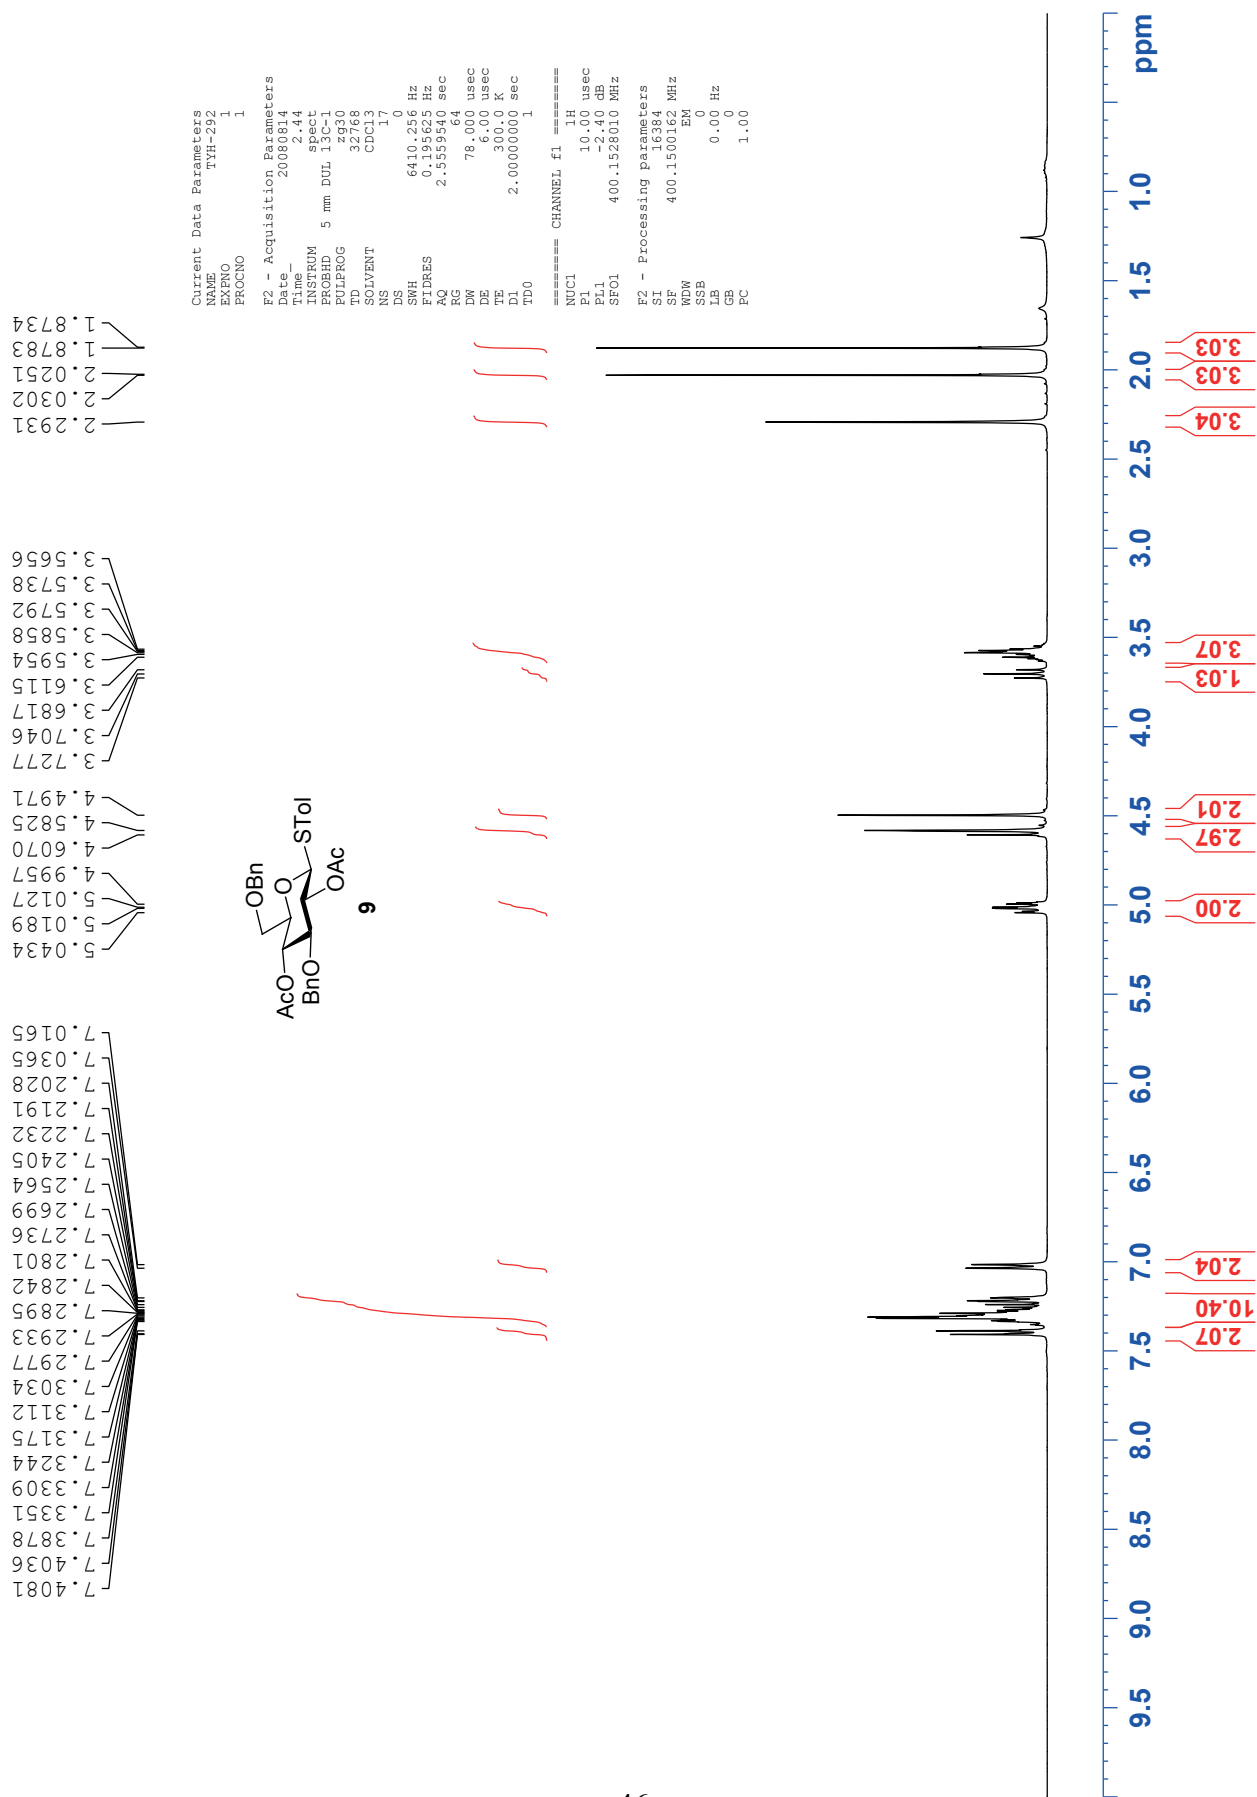

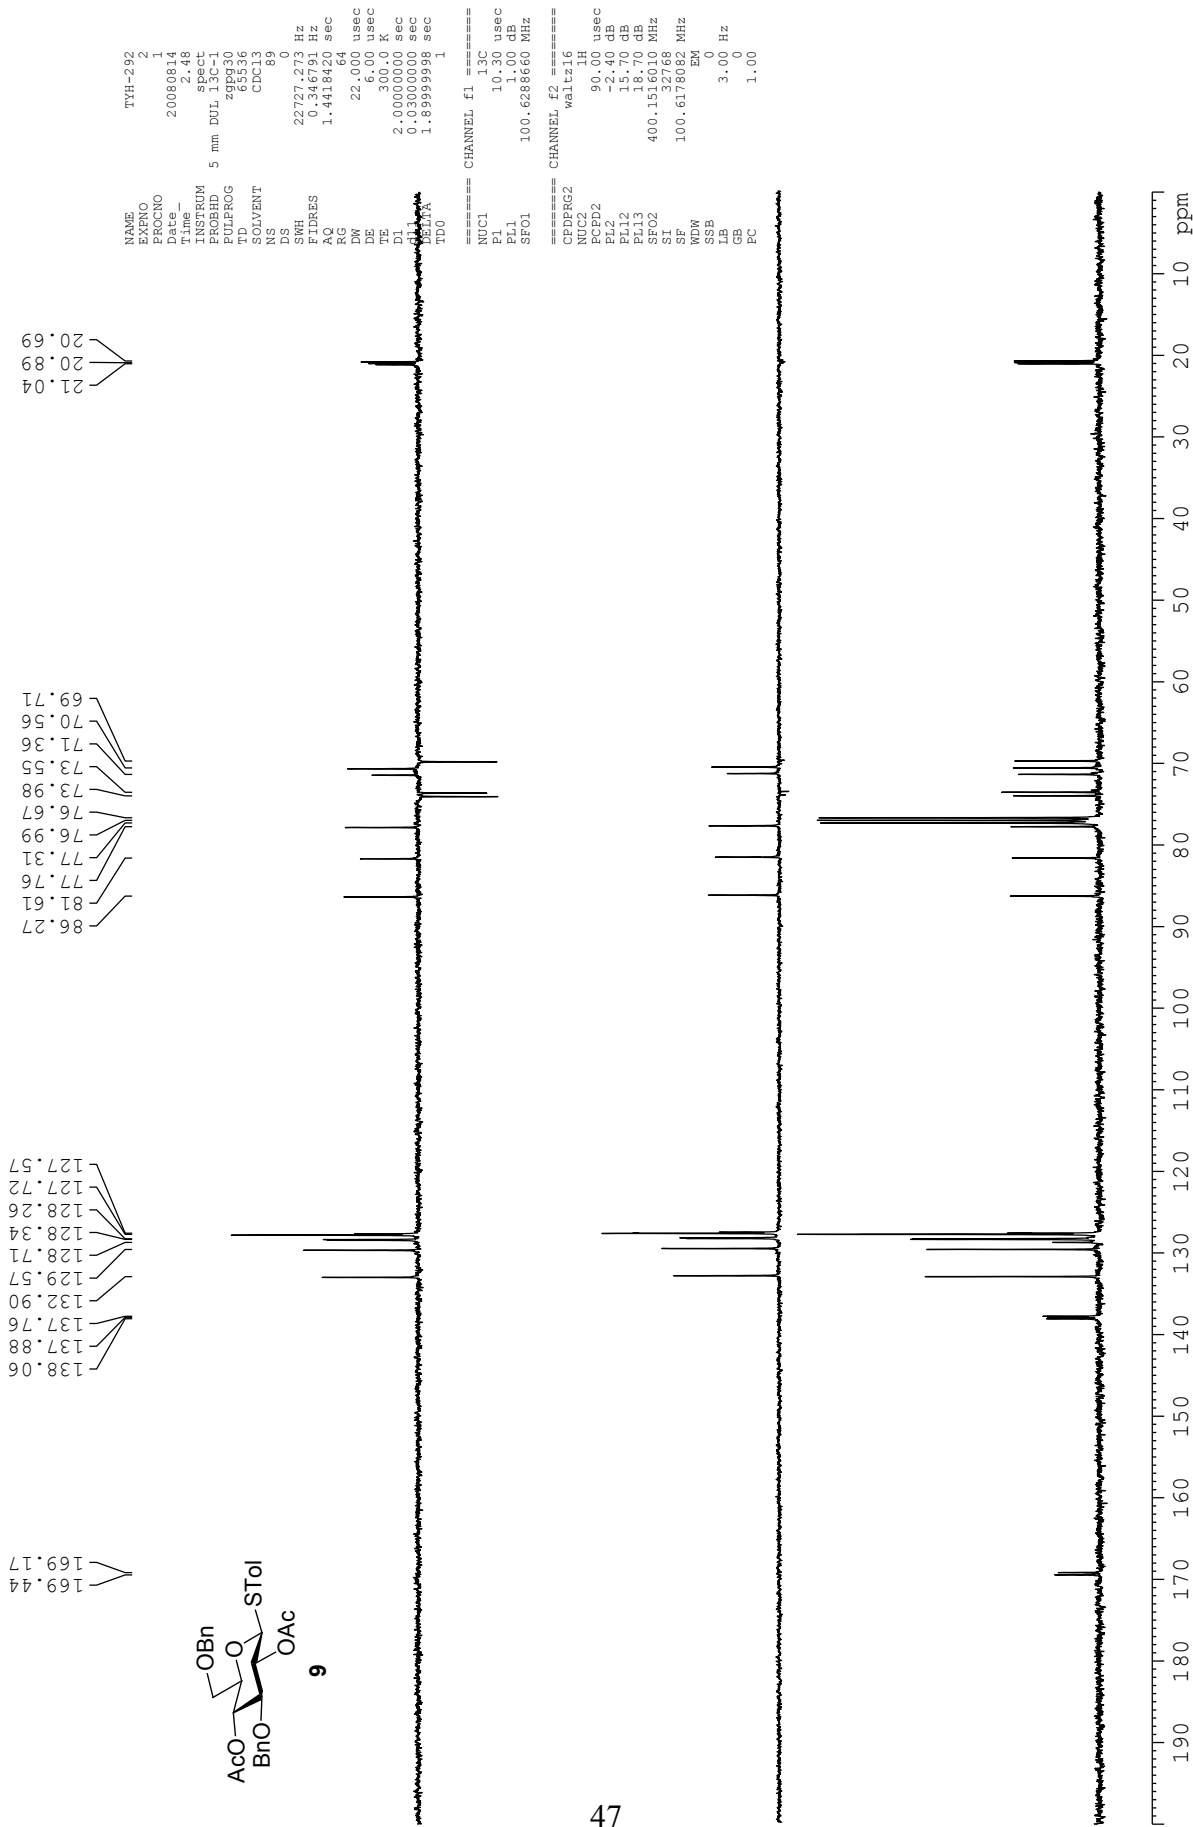

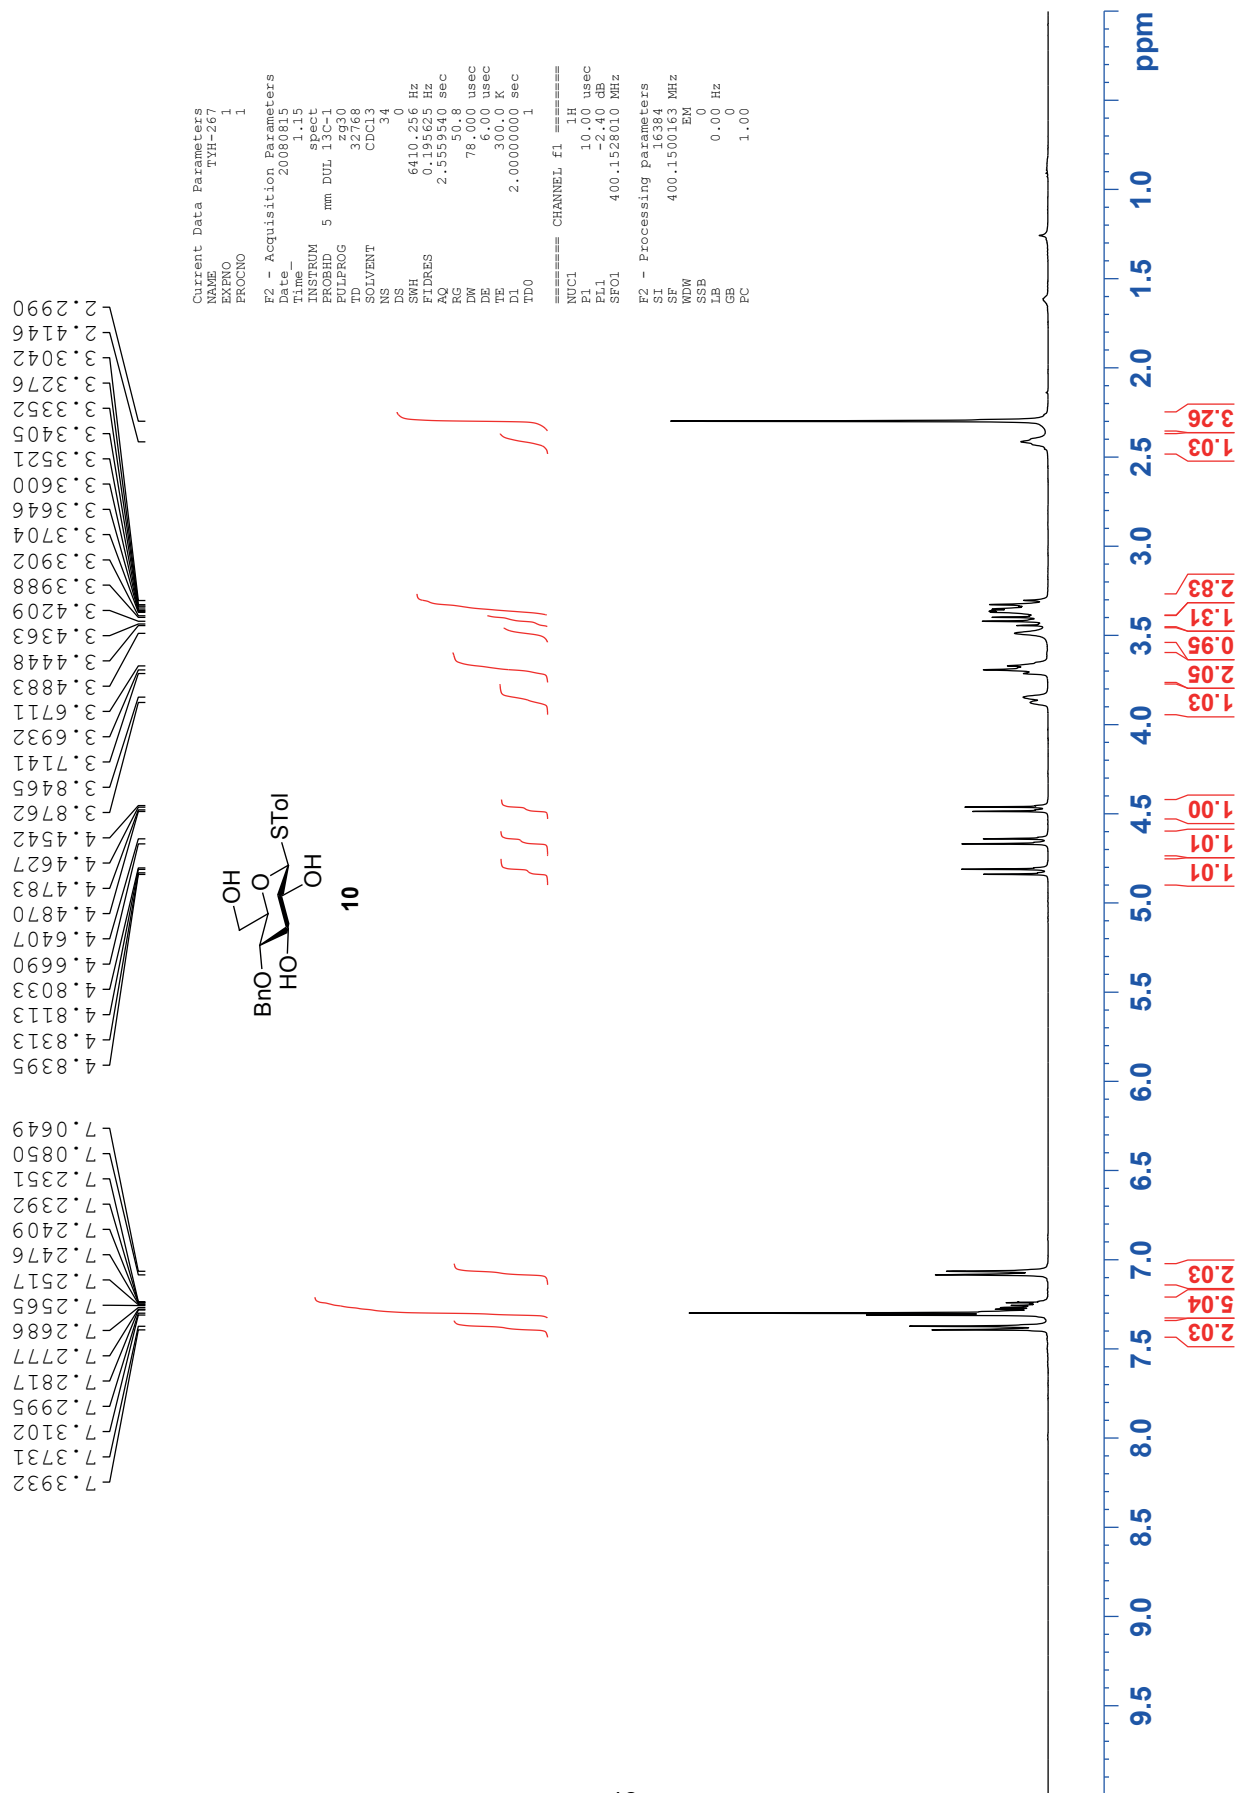



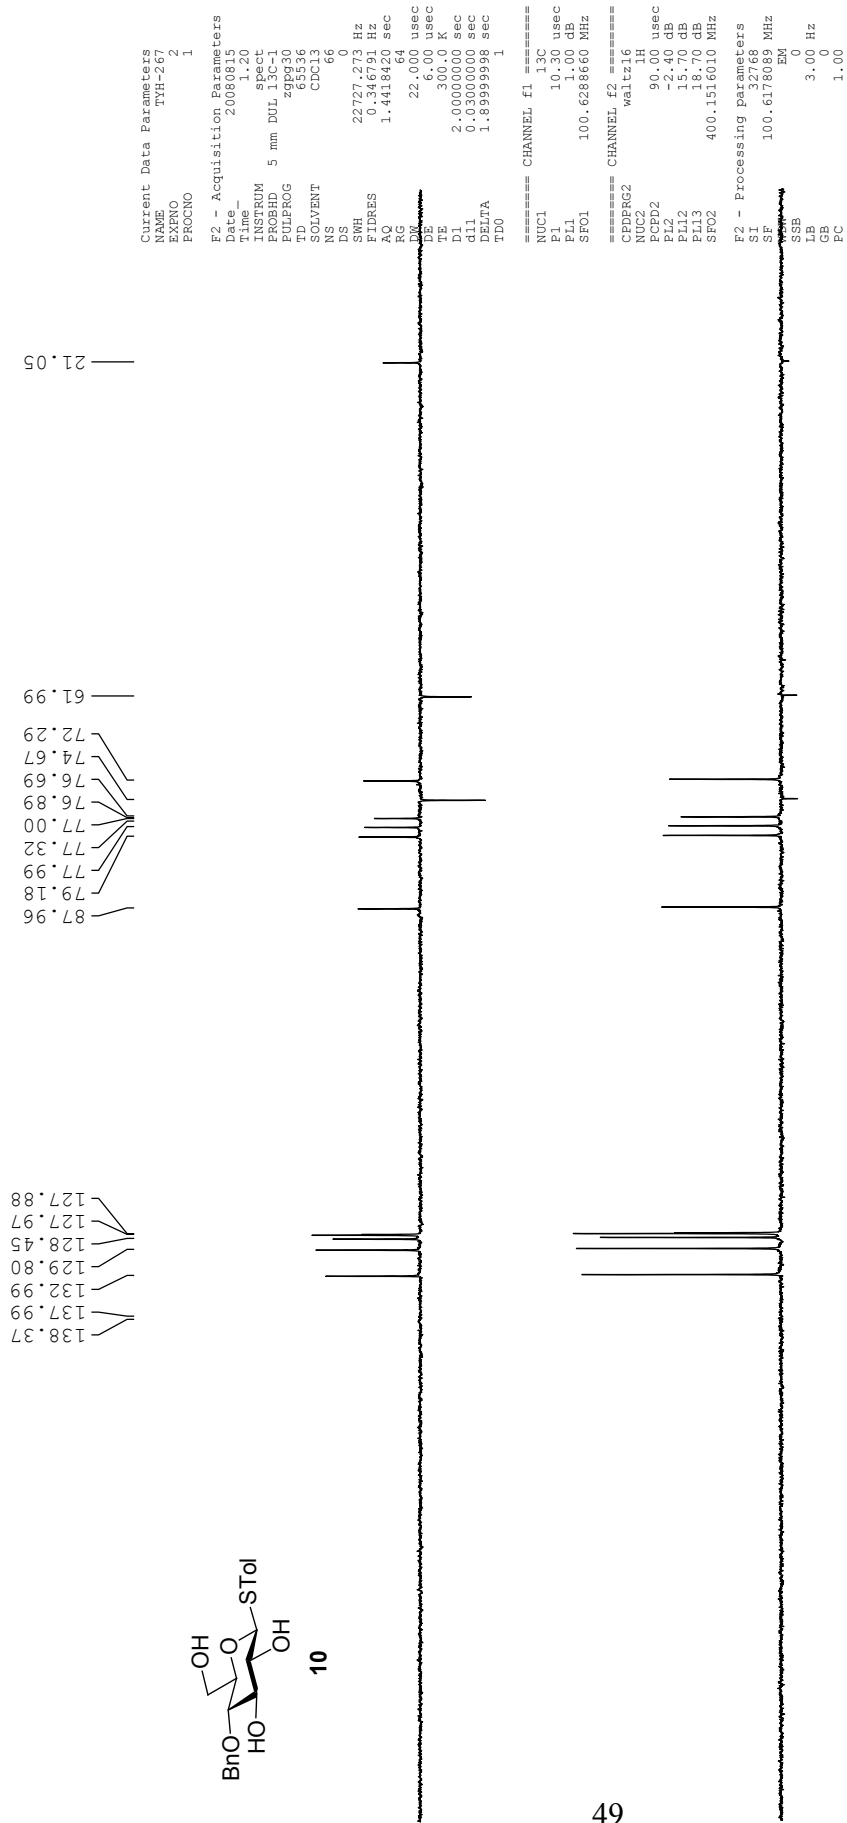

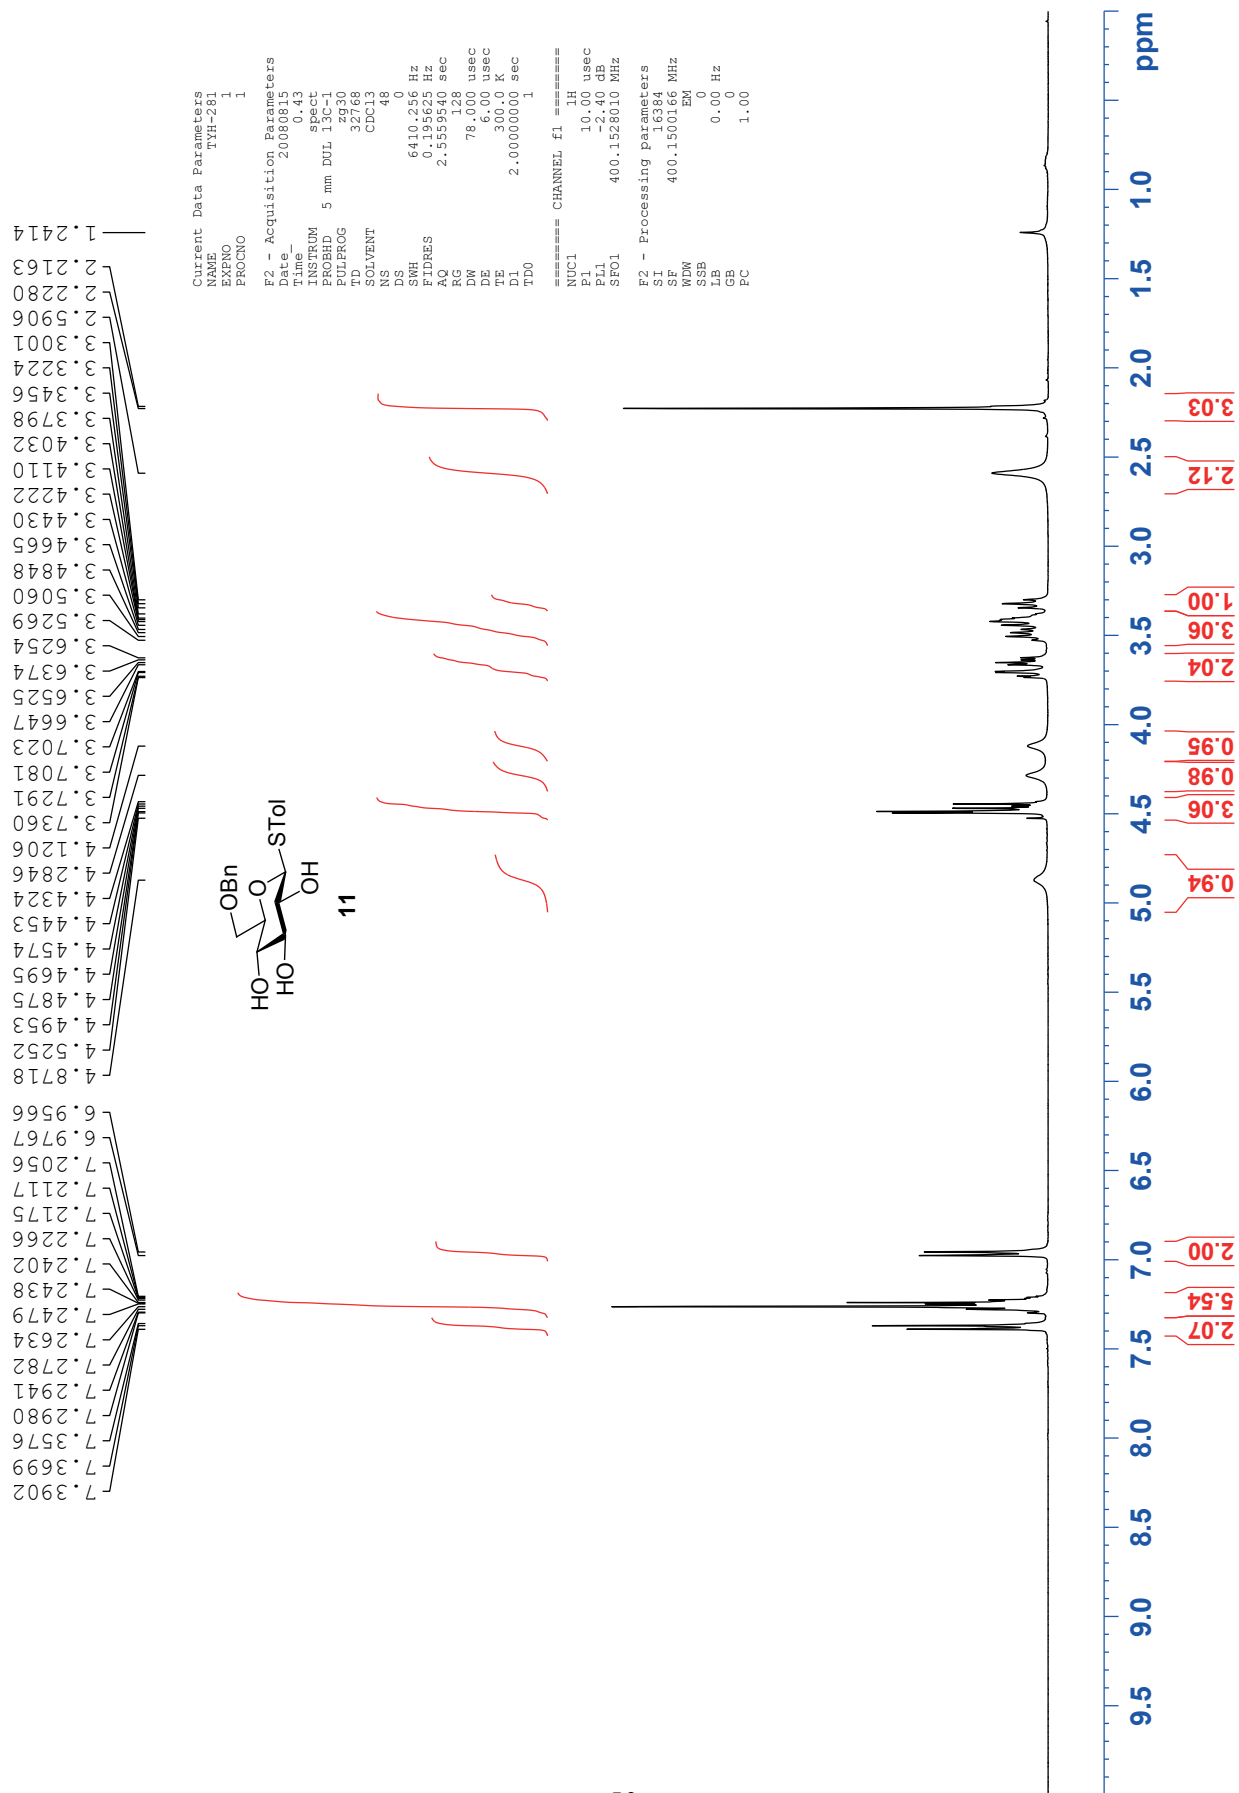

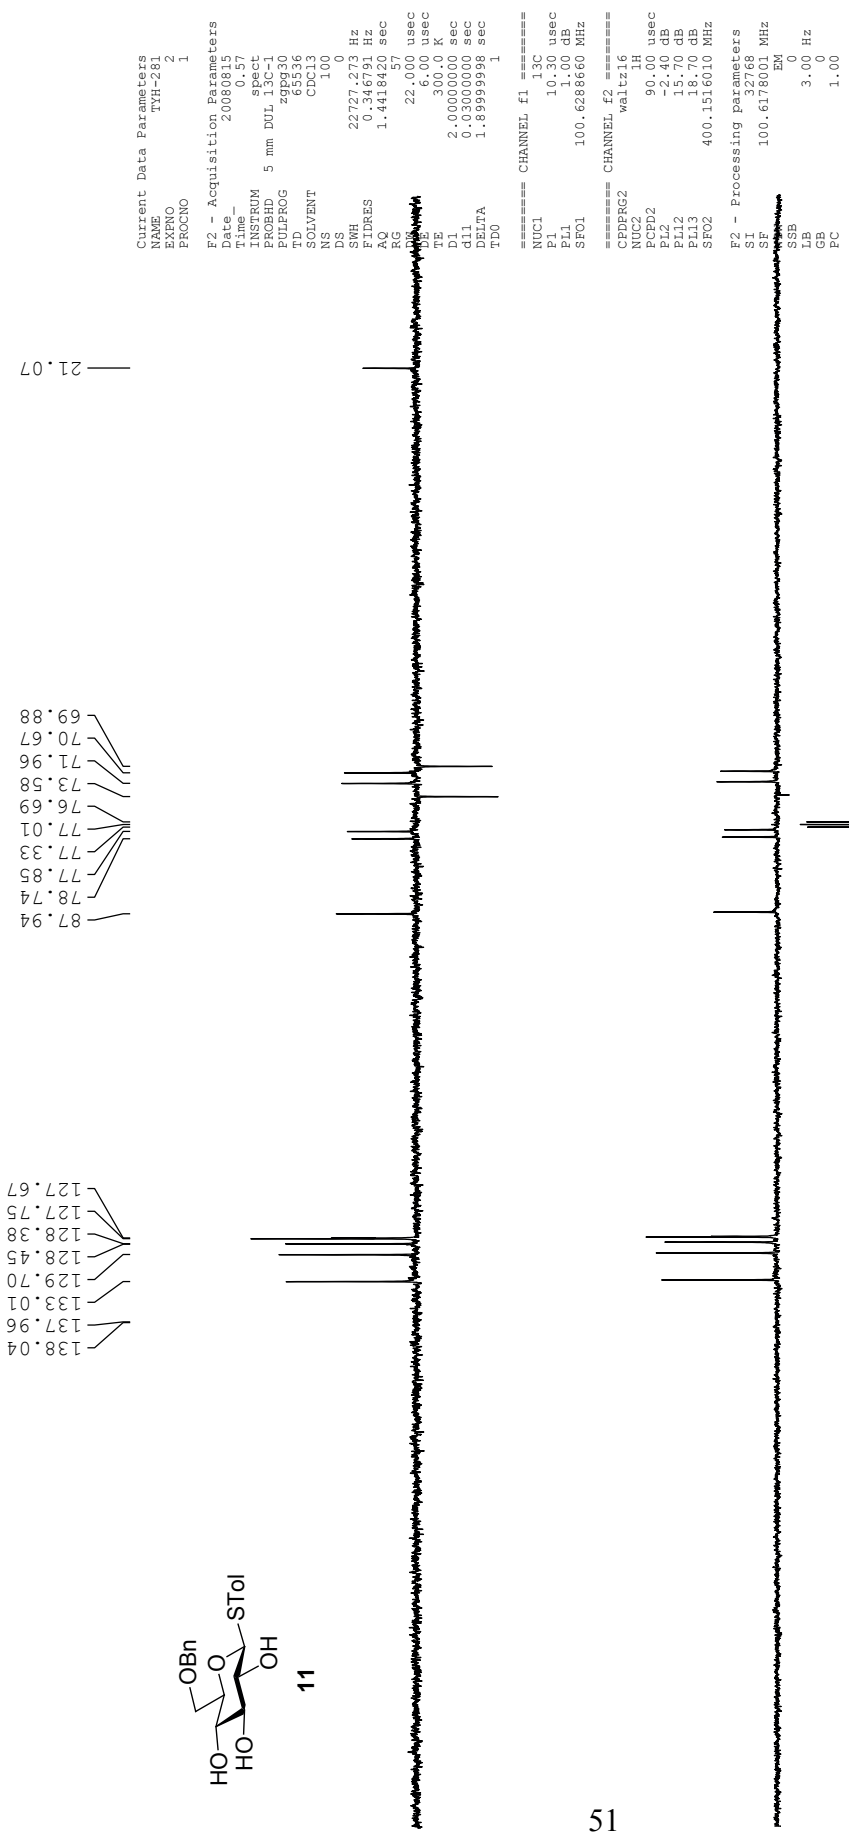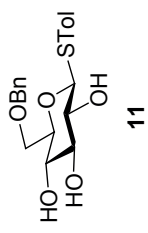

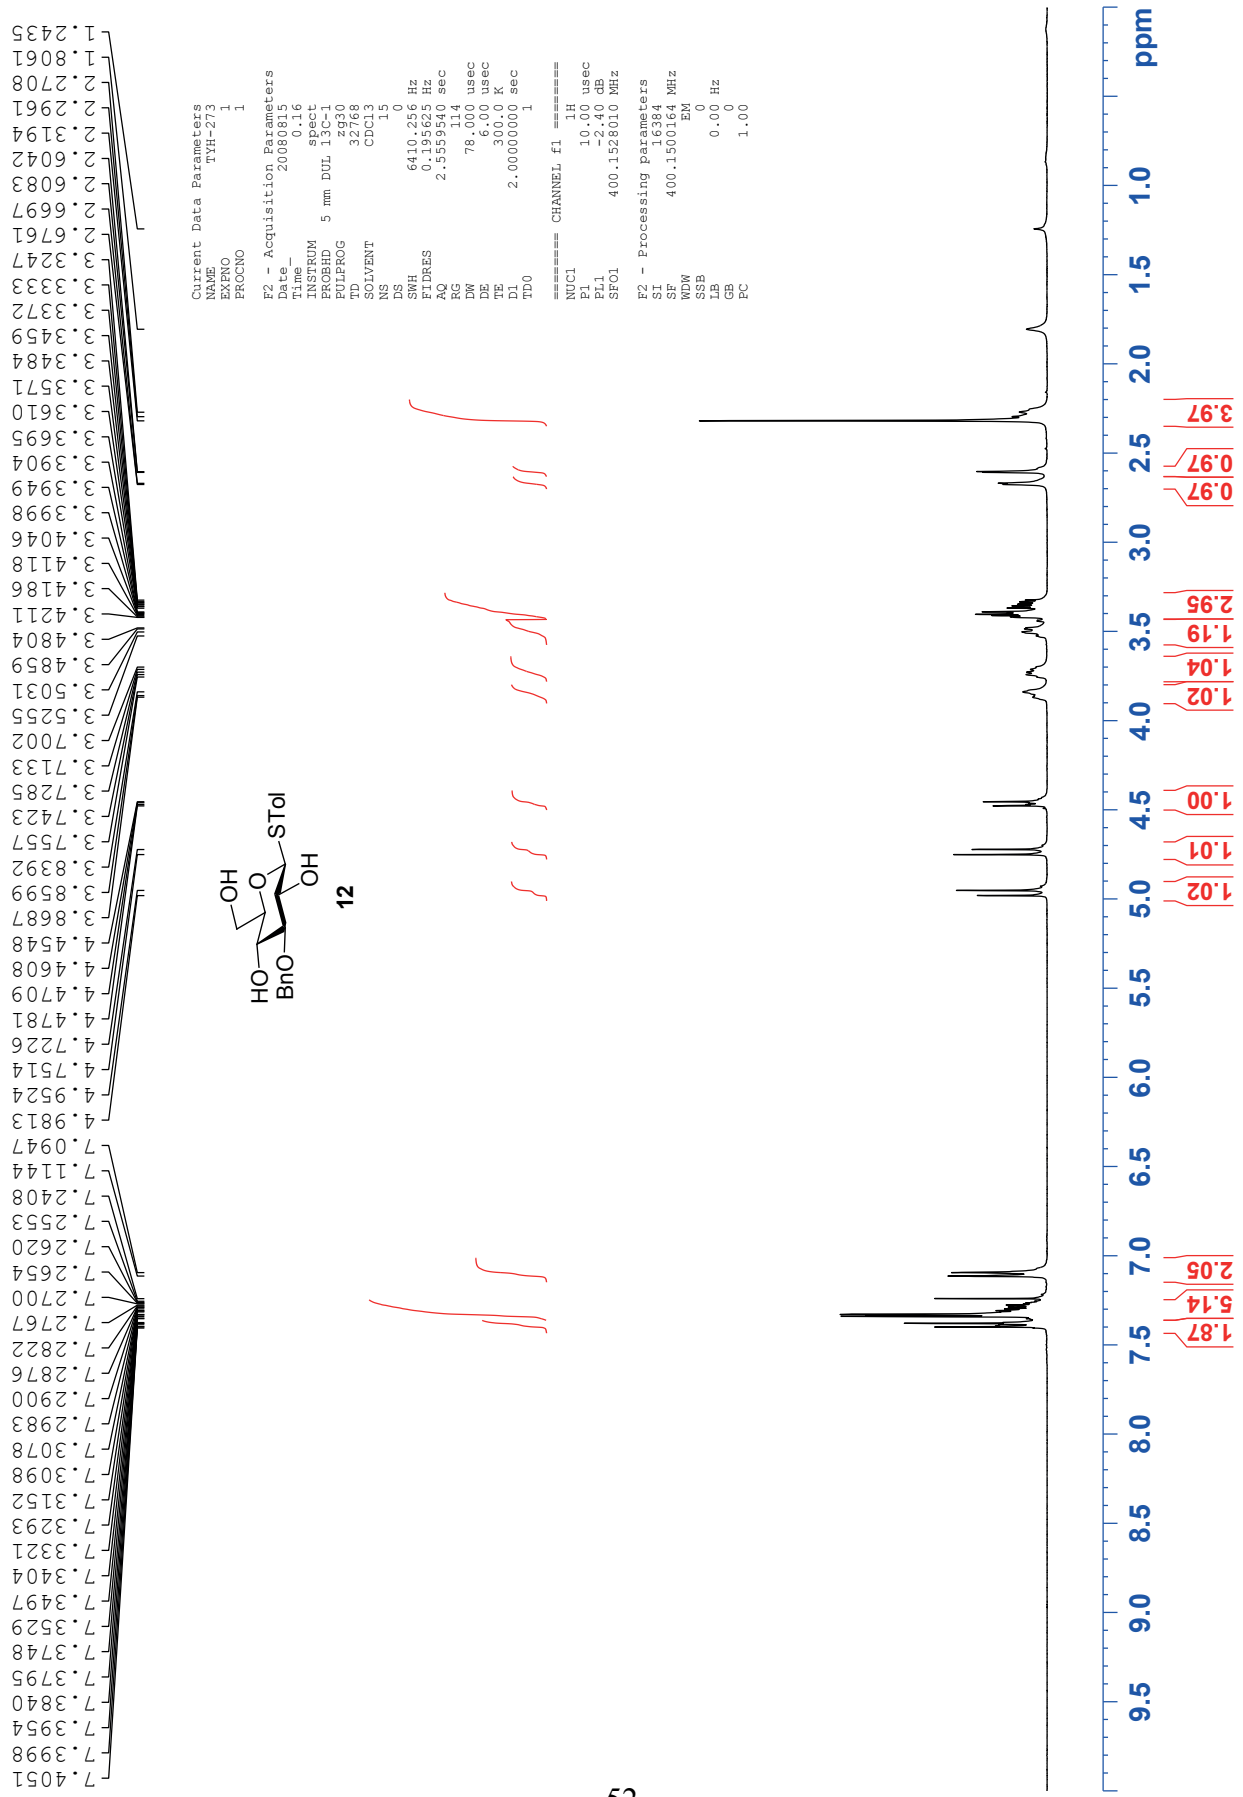



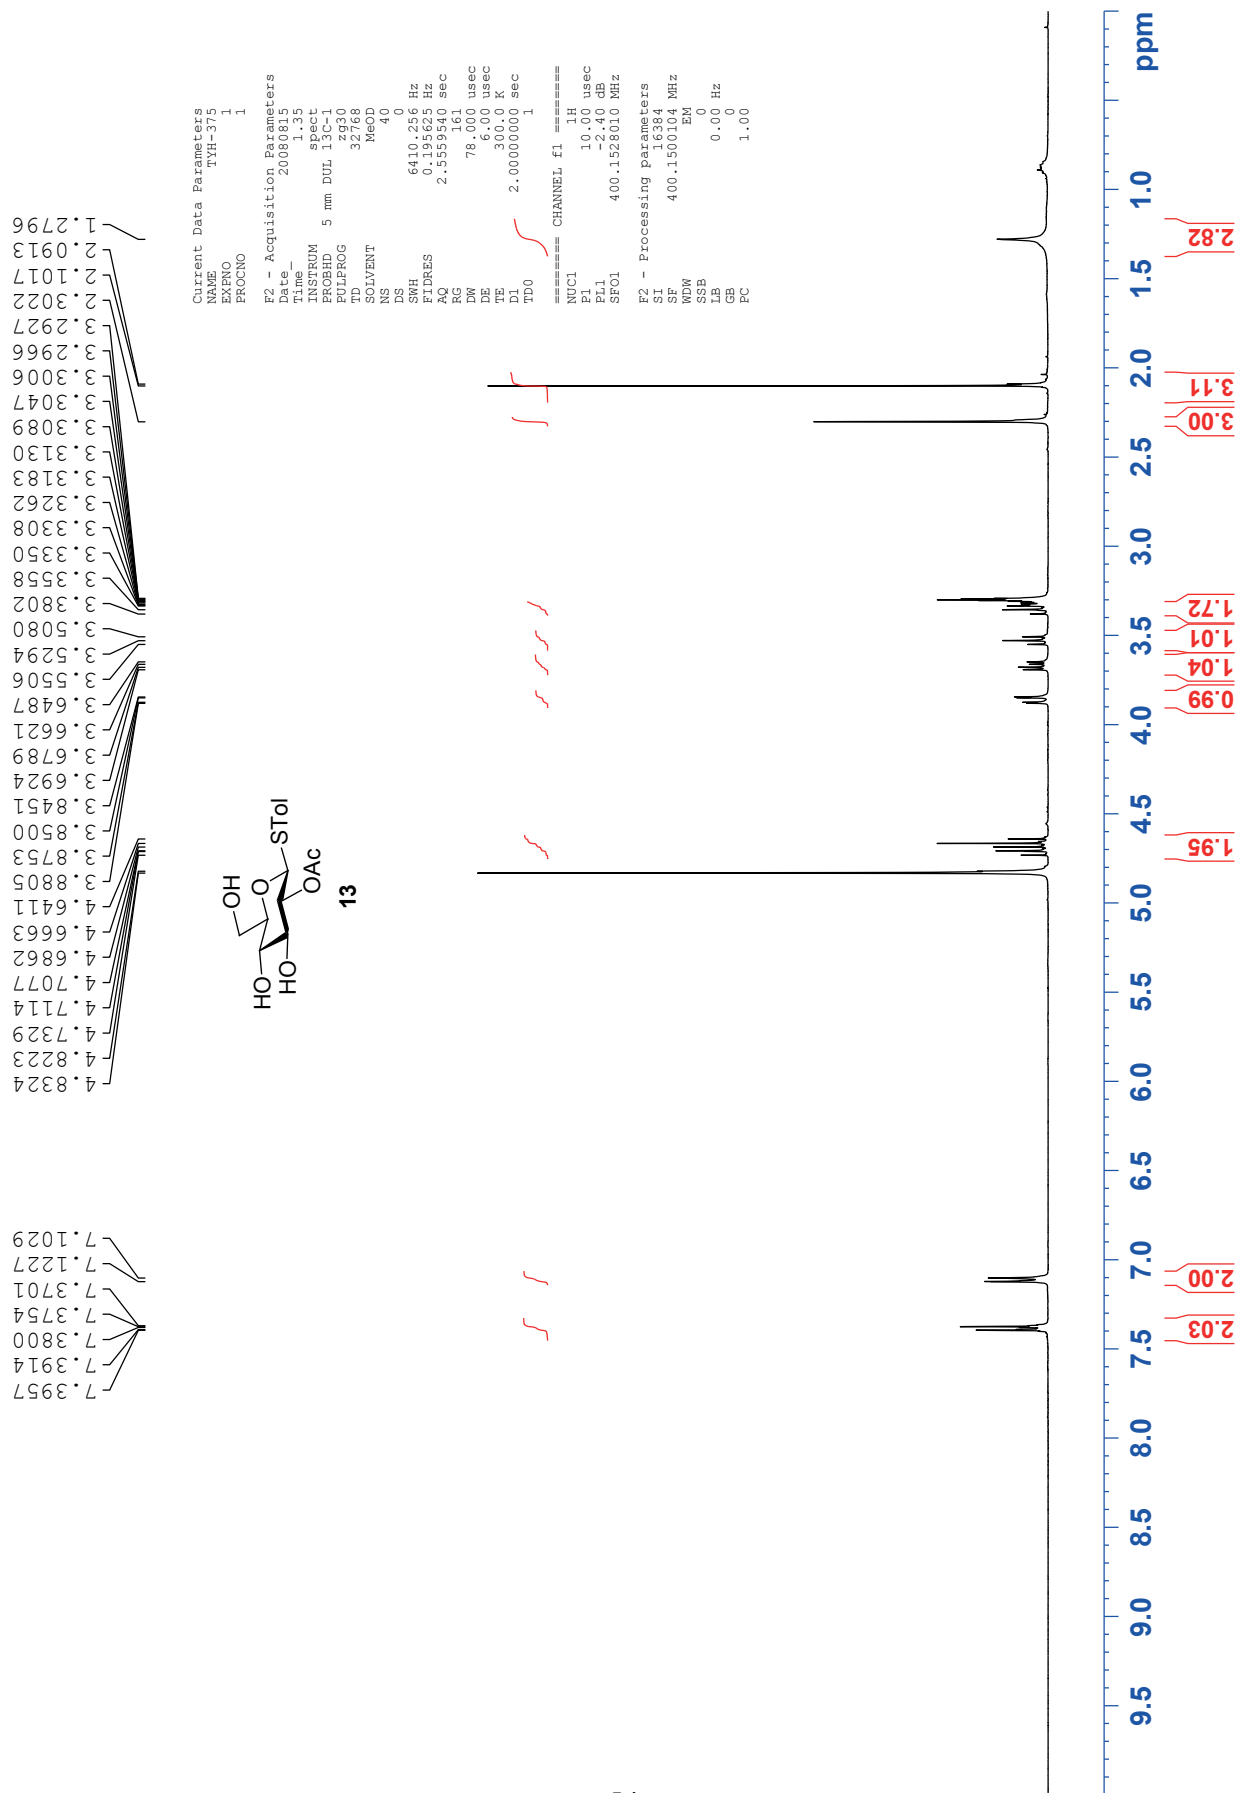

Current Data Parameters  
NAME I1H-375  
EXNO 2  
PROCNO 1

F2 - Acquisition Parameters  
Date\_ 20080815  
Time\_ 1.51  
INSTRUM spect  
PROBHD 5 mm DUL-13C-1  
PULPROG zgpg30  
TD 65536  
SOLVENT MeOD  
NS 100  
DS 0  
SWH 22727.273 Hz  
FIDRES 0.346791 Hz  
AQ 1.4418420 sec  
RG 327.5  
SFO1 100.6288660 MHz  
TE 300.0 K  
D1 2.00000000 sec  
d11 0.03000000 sec  
DELTA 1.89999998 sec  
TDO 1

===== CHANNEL f1 =====  
NUC1 13C  
P1 10.30 usec  
PL1 1.00 dB  
SFO1 100.6288660 MHz

===== CHANNEL f2 =====  
CPDPRG2 waltz16  
NUC2 13C  
PCPD2 90.00 usec  
PL2 -2.40 dB  
PL12 15.70 dB  
PL13 18.70 dB  
SFO2 400.1516010 MHz

F2 - Processing parameters  
SI 1  
SF 100.6176569 MHz  
WDW EM  
SSB 0  
LB 3.00 Hz  
GB 0  
PC 1.00

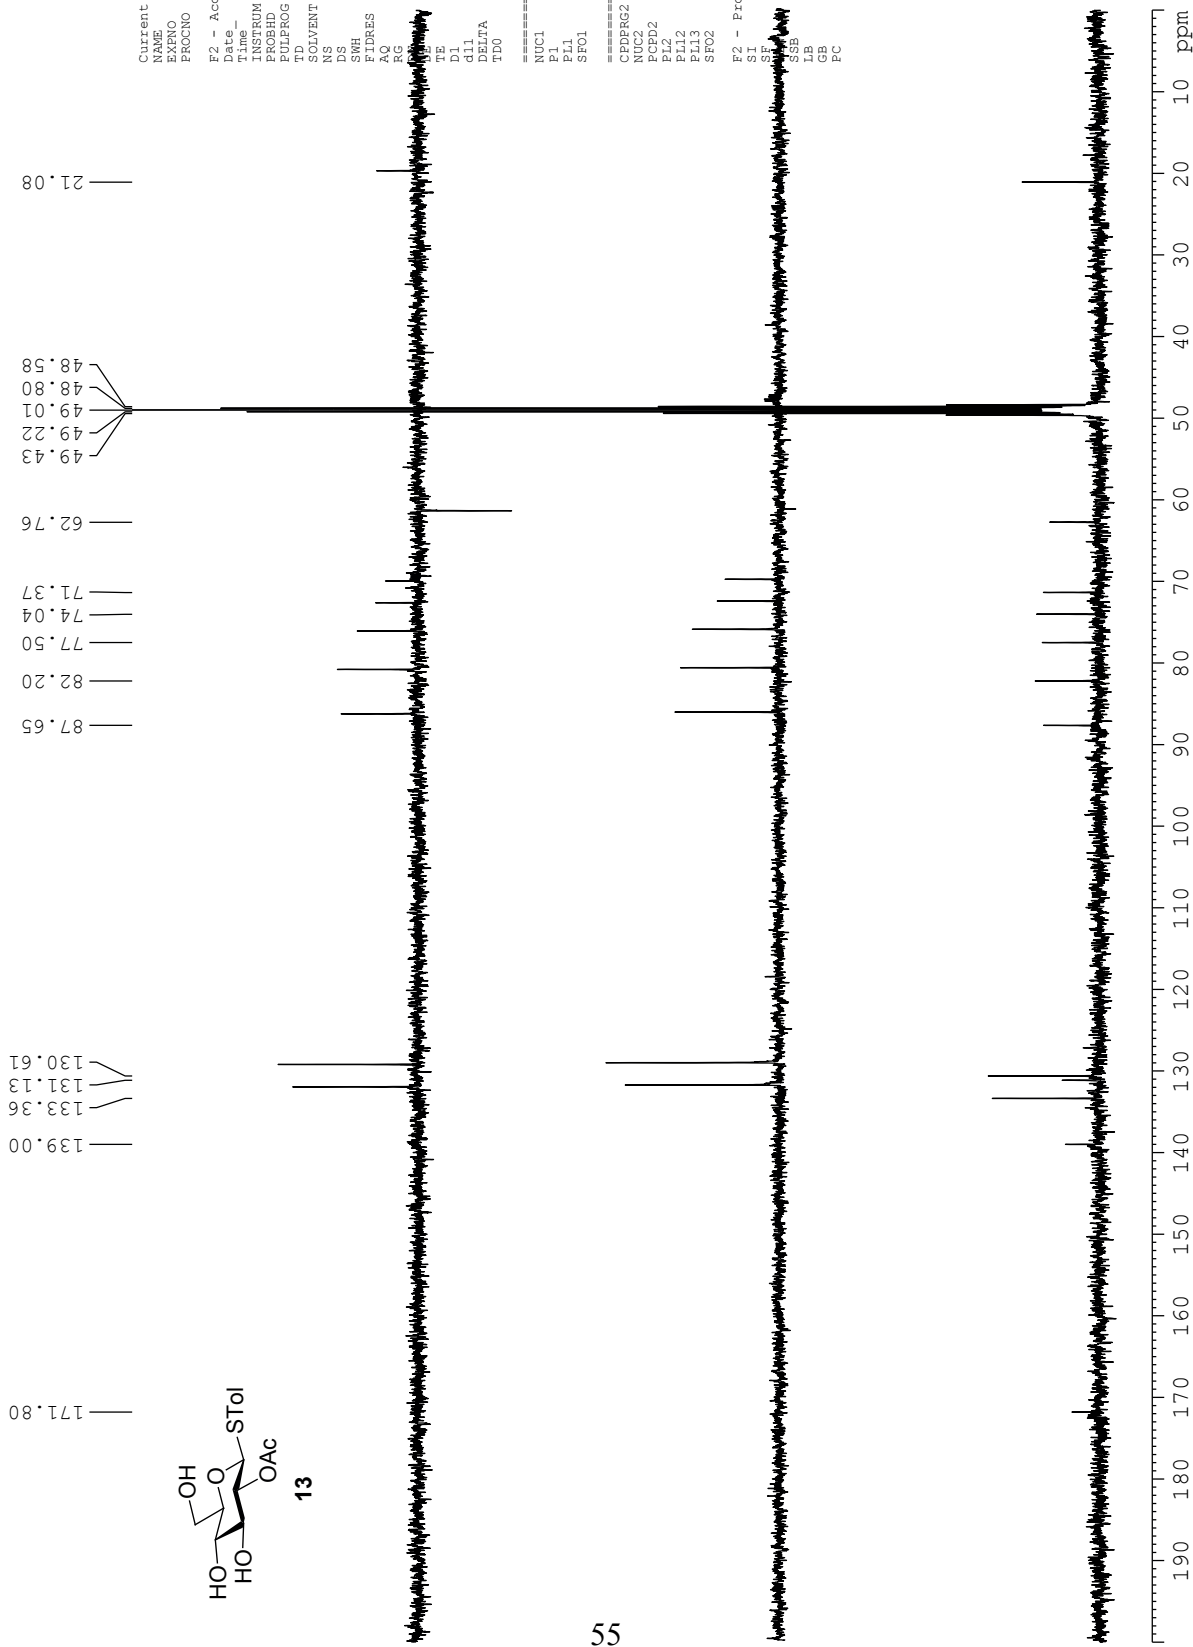

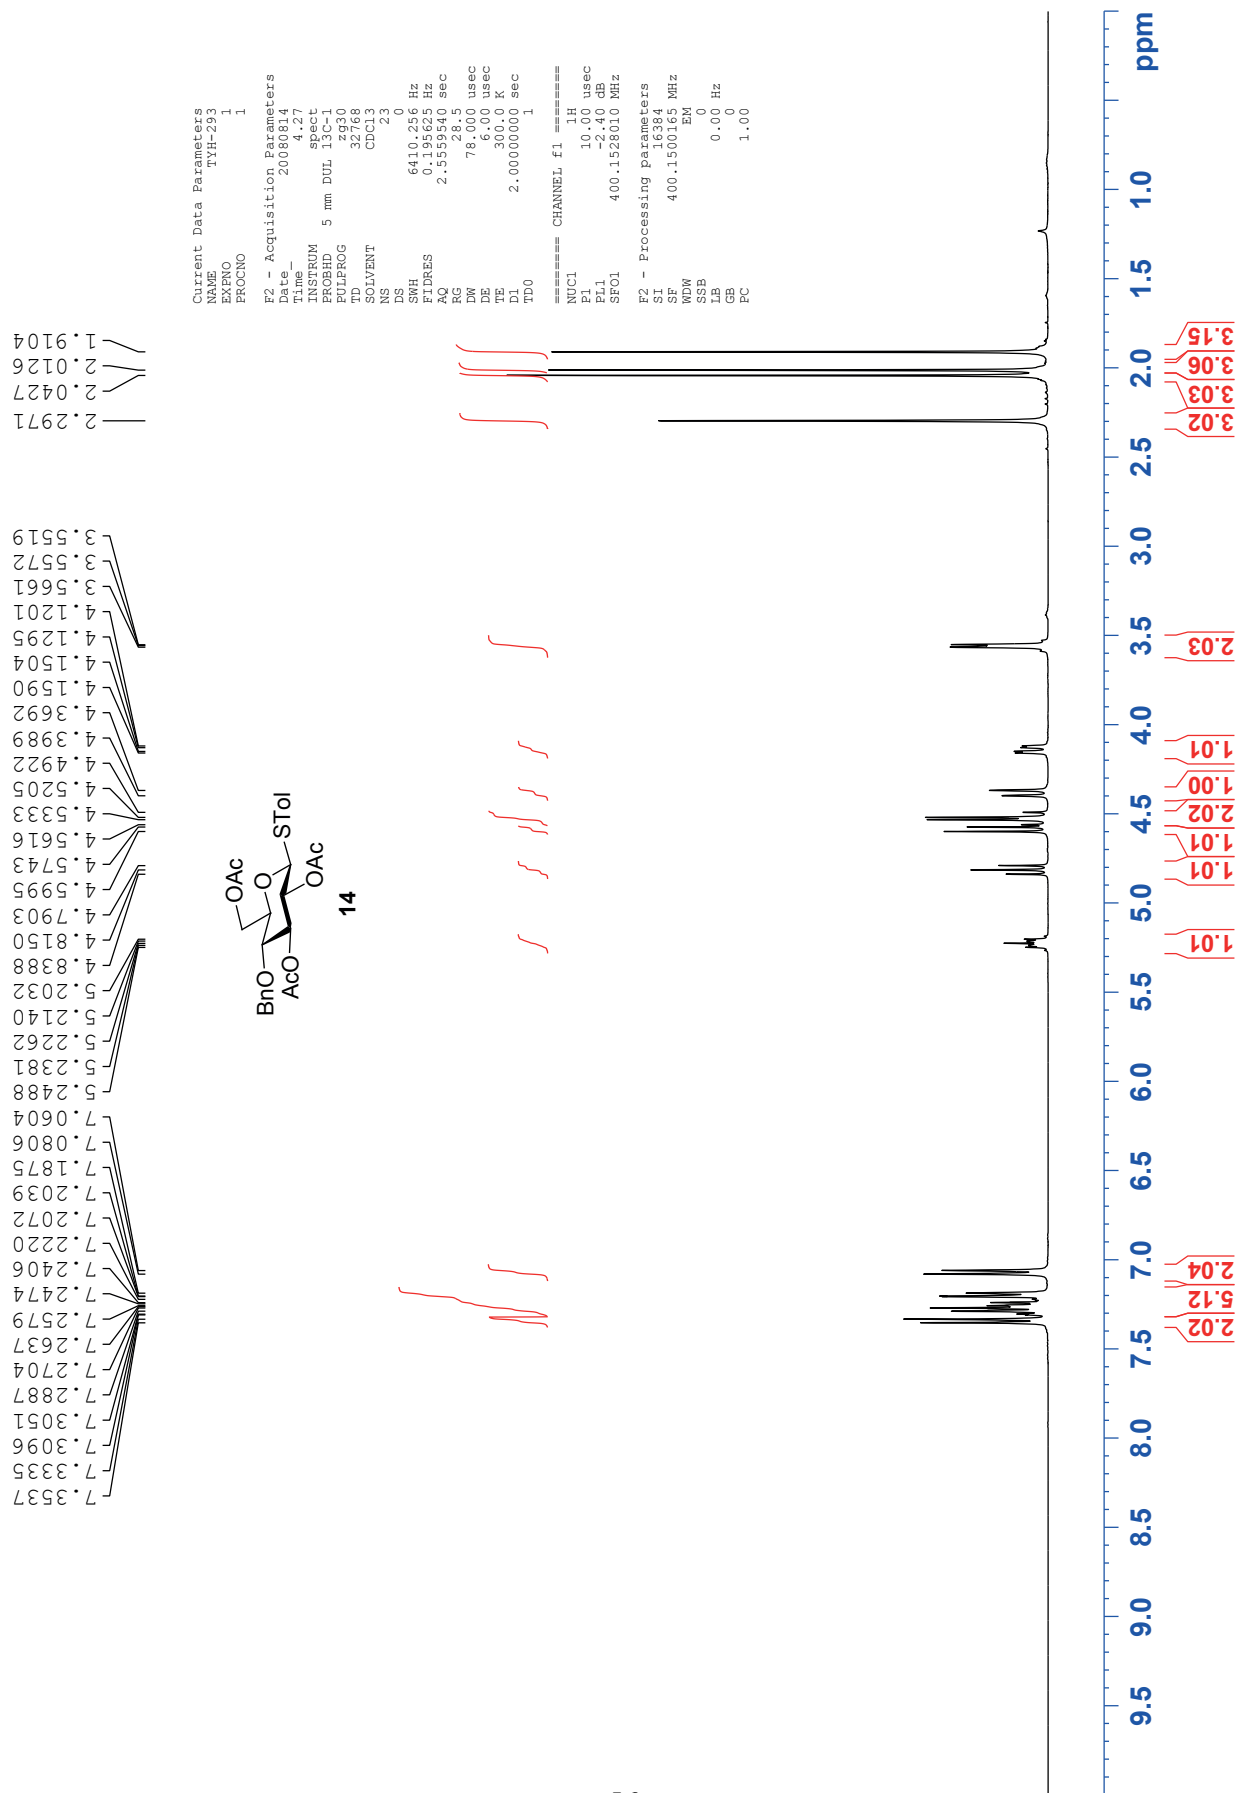



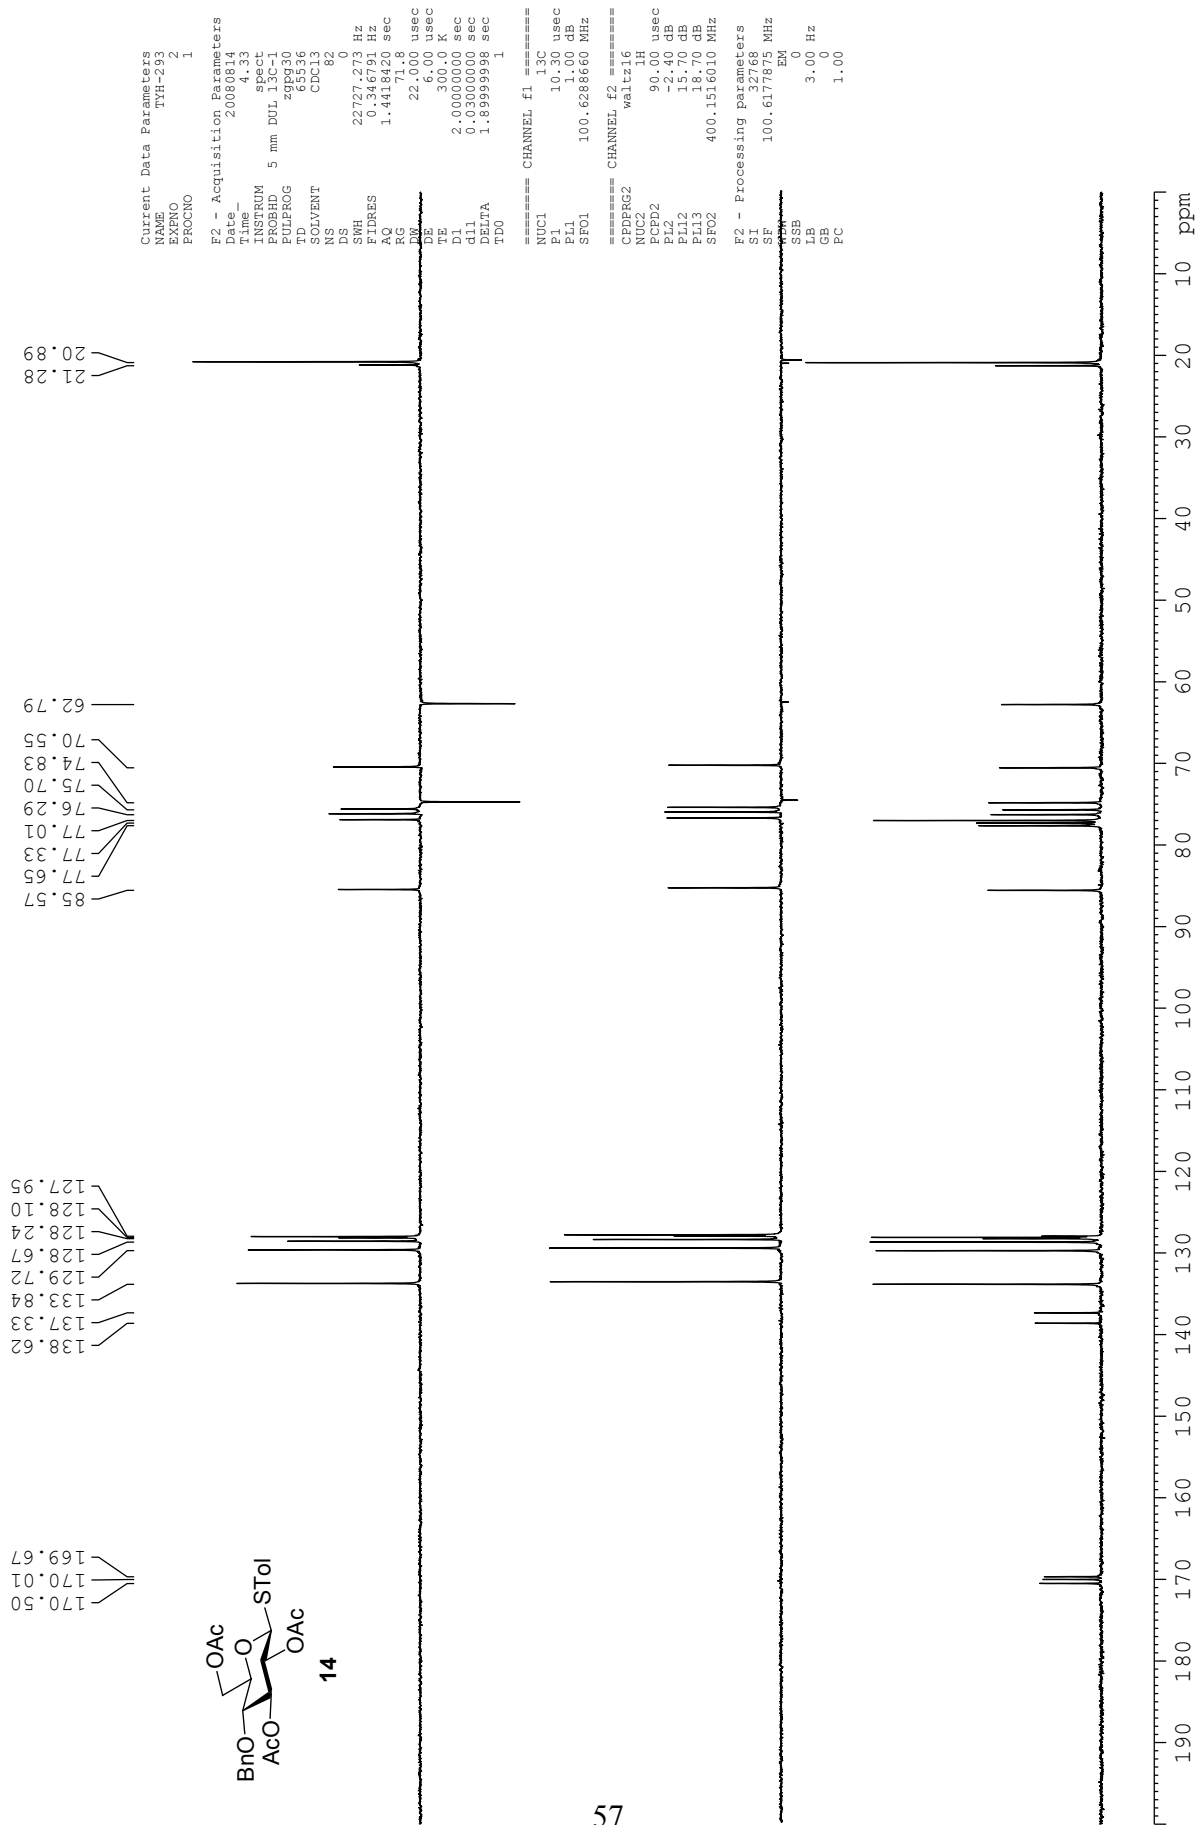

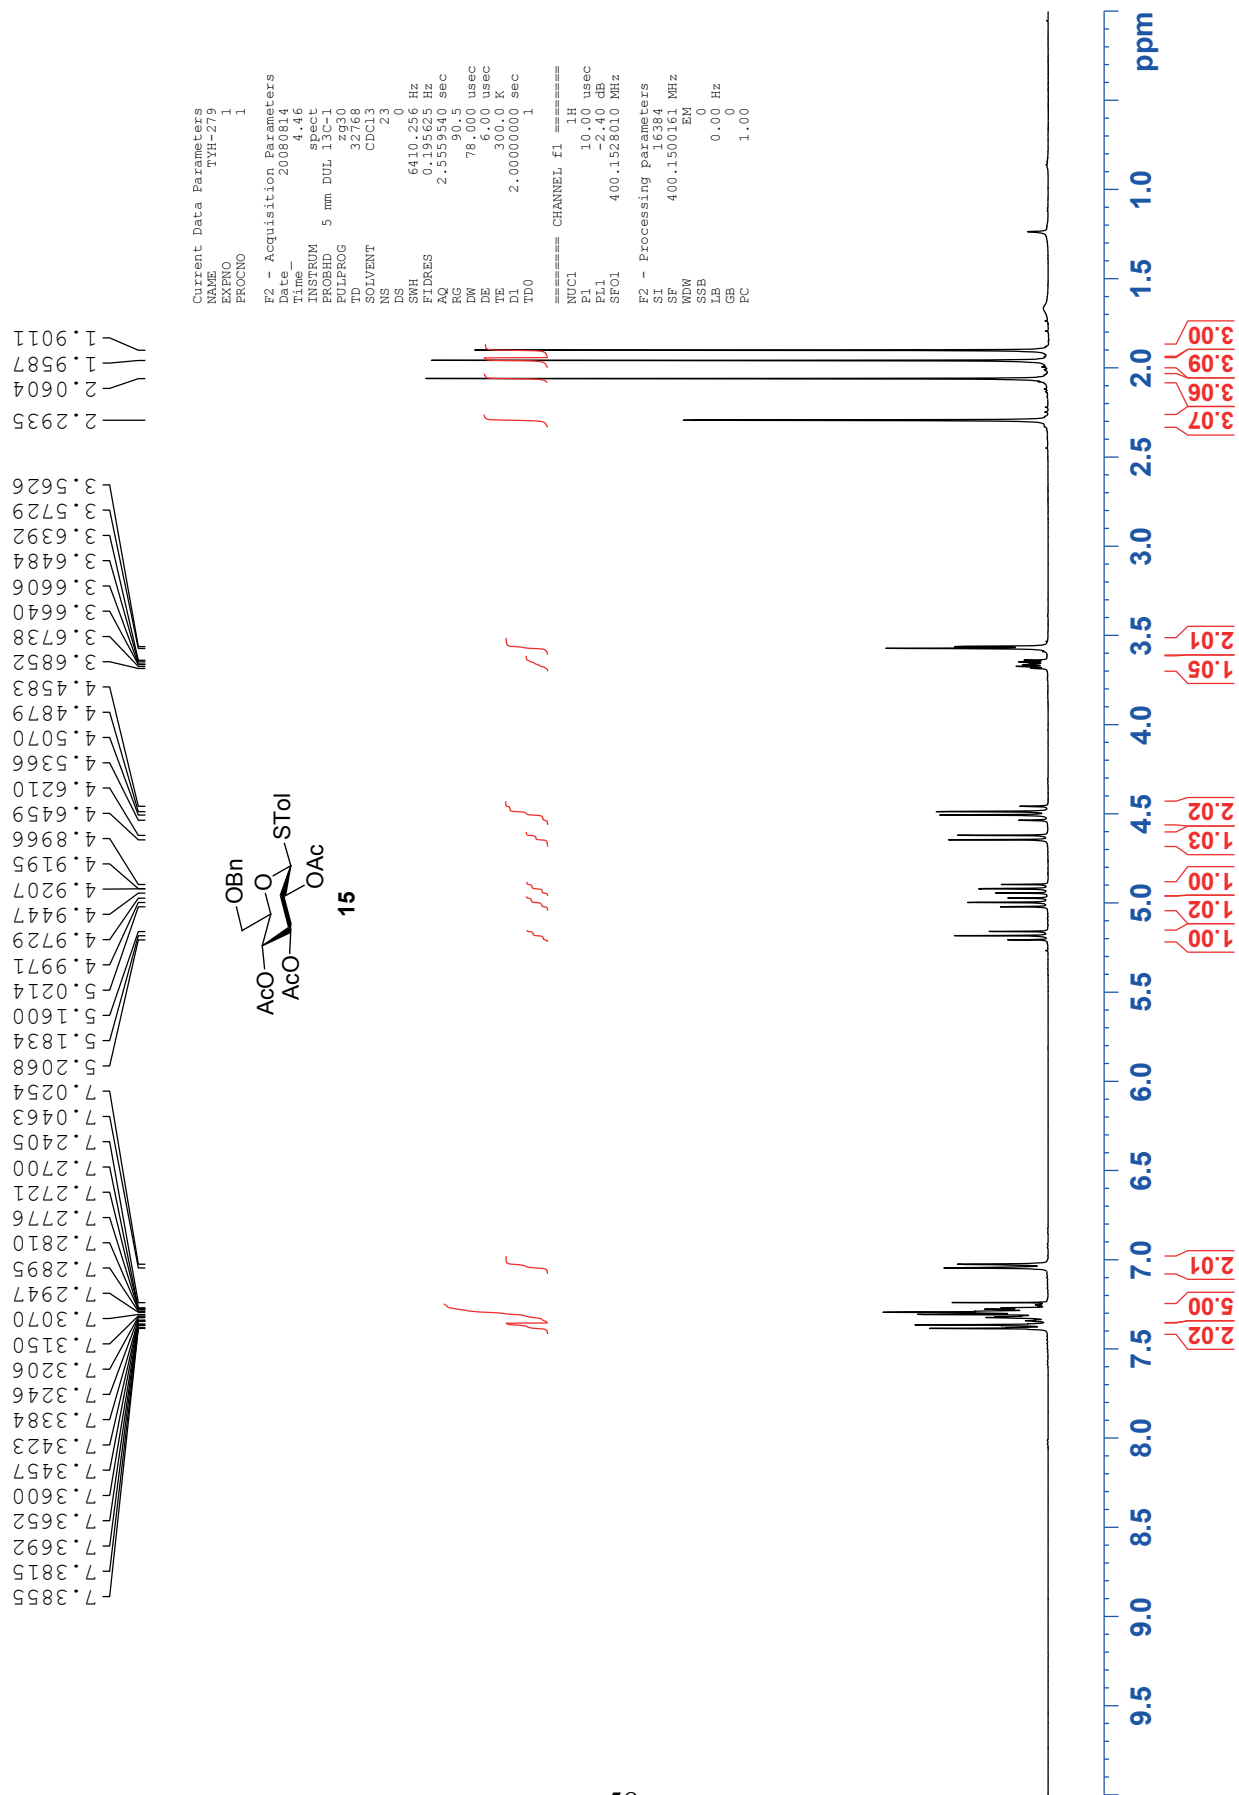

Current Data Parameters  
 NAME IH-279  
 EXNO 1  
 PROCNO 1

F2 - Acquisition Parameters  
 Date\_ 20080814  
 Time\_ 4.50  
 INSTRUM spect  
 PULPROG zgpg30  
 FIDRES 5 mm DUL zgpg30  
 TD 65536  
 SOLVENT CDCl3  
 NS 84  
 DS 0  
 SWH 22727.273 Hz  
 FIDRES 0.346791 Hz  
 AQ 1.418478 sec  
 DE 22.000 usec  
 TE 300.0 K  
 D1 2.00000000 sec  
 d11 0.03000000 sec  
 DELTA 1.89999998 sec  
 TDO 1

===== CHANNEL f1 =====  
 NUC1 13C  
 P1 10.30 usec  
 PL1 1.00 dB  
 SFO1 100.6288660 MHz

===== CHANNEL f2 =====  
 CDPFG2 waltz16  
 NUC2 13C  
 PCPD2 90.00 usec  
 PL2 -2.40 dB  
 PLI2 15.70 dB  
 PLI3 18.70 dB  
 SFO2 400.1516010 MHz

F2 - Processing parameters  
 SI 32768  
 SF 100.6176000 MHz  
 RG 32768  
 RW 0  
 SSB 0  
 LB 3.00 Hz  
 GB 0  
 FC 1.00

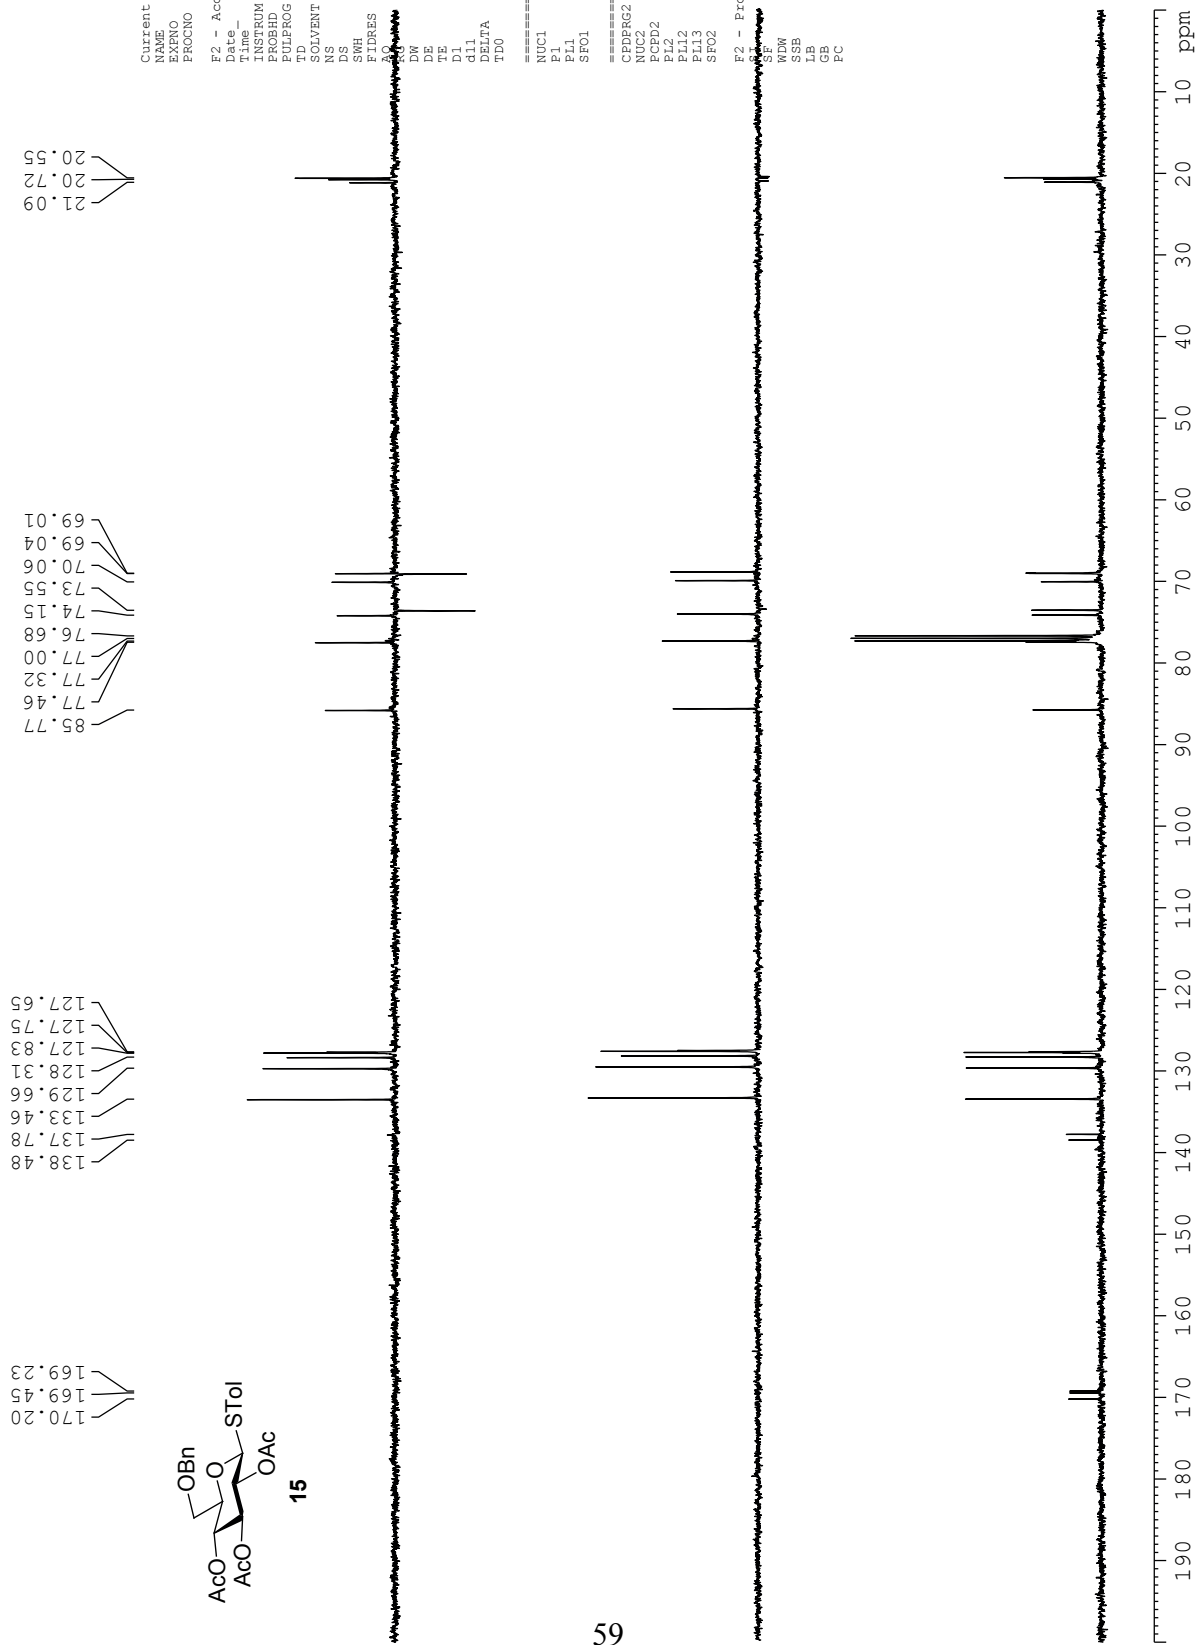

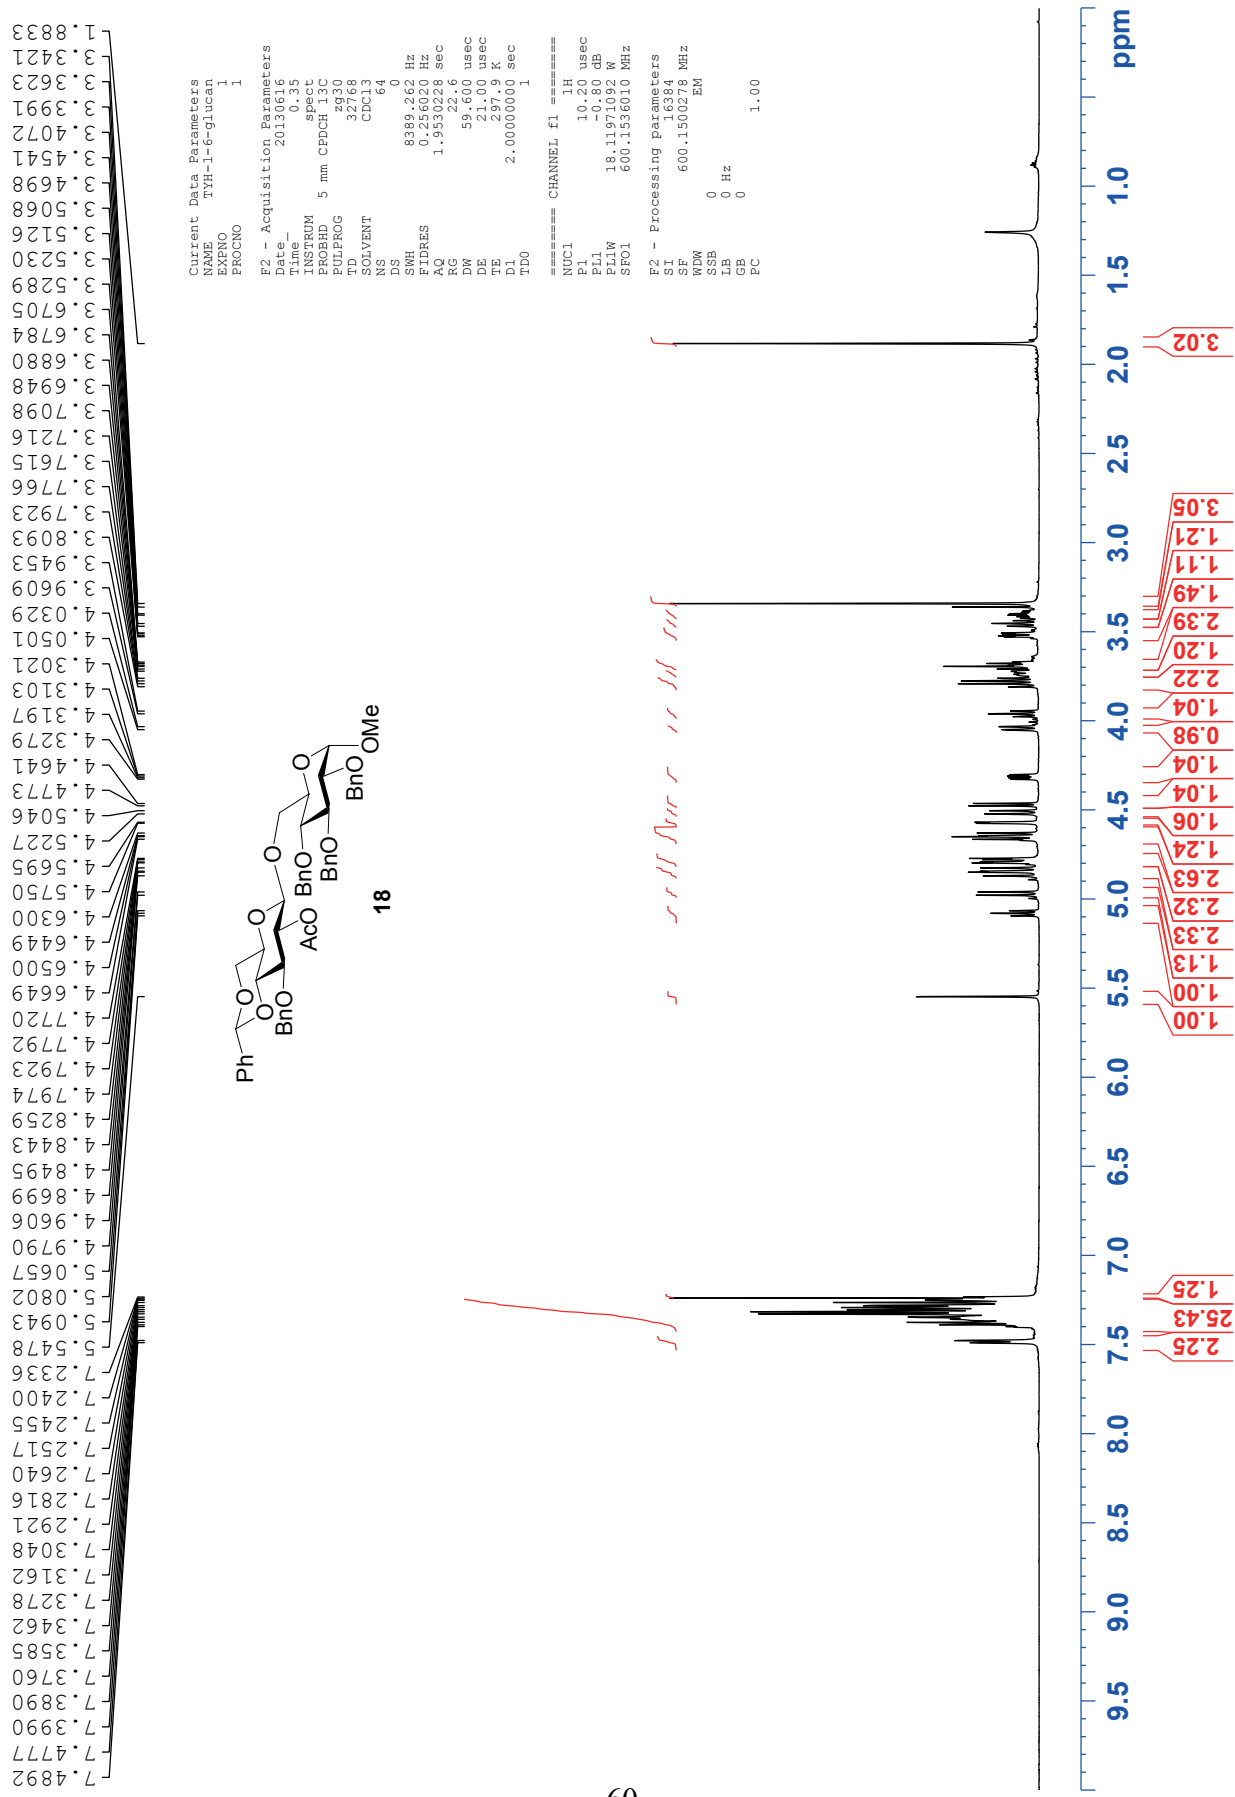

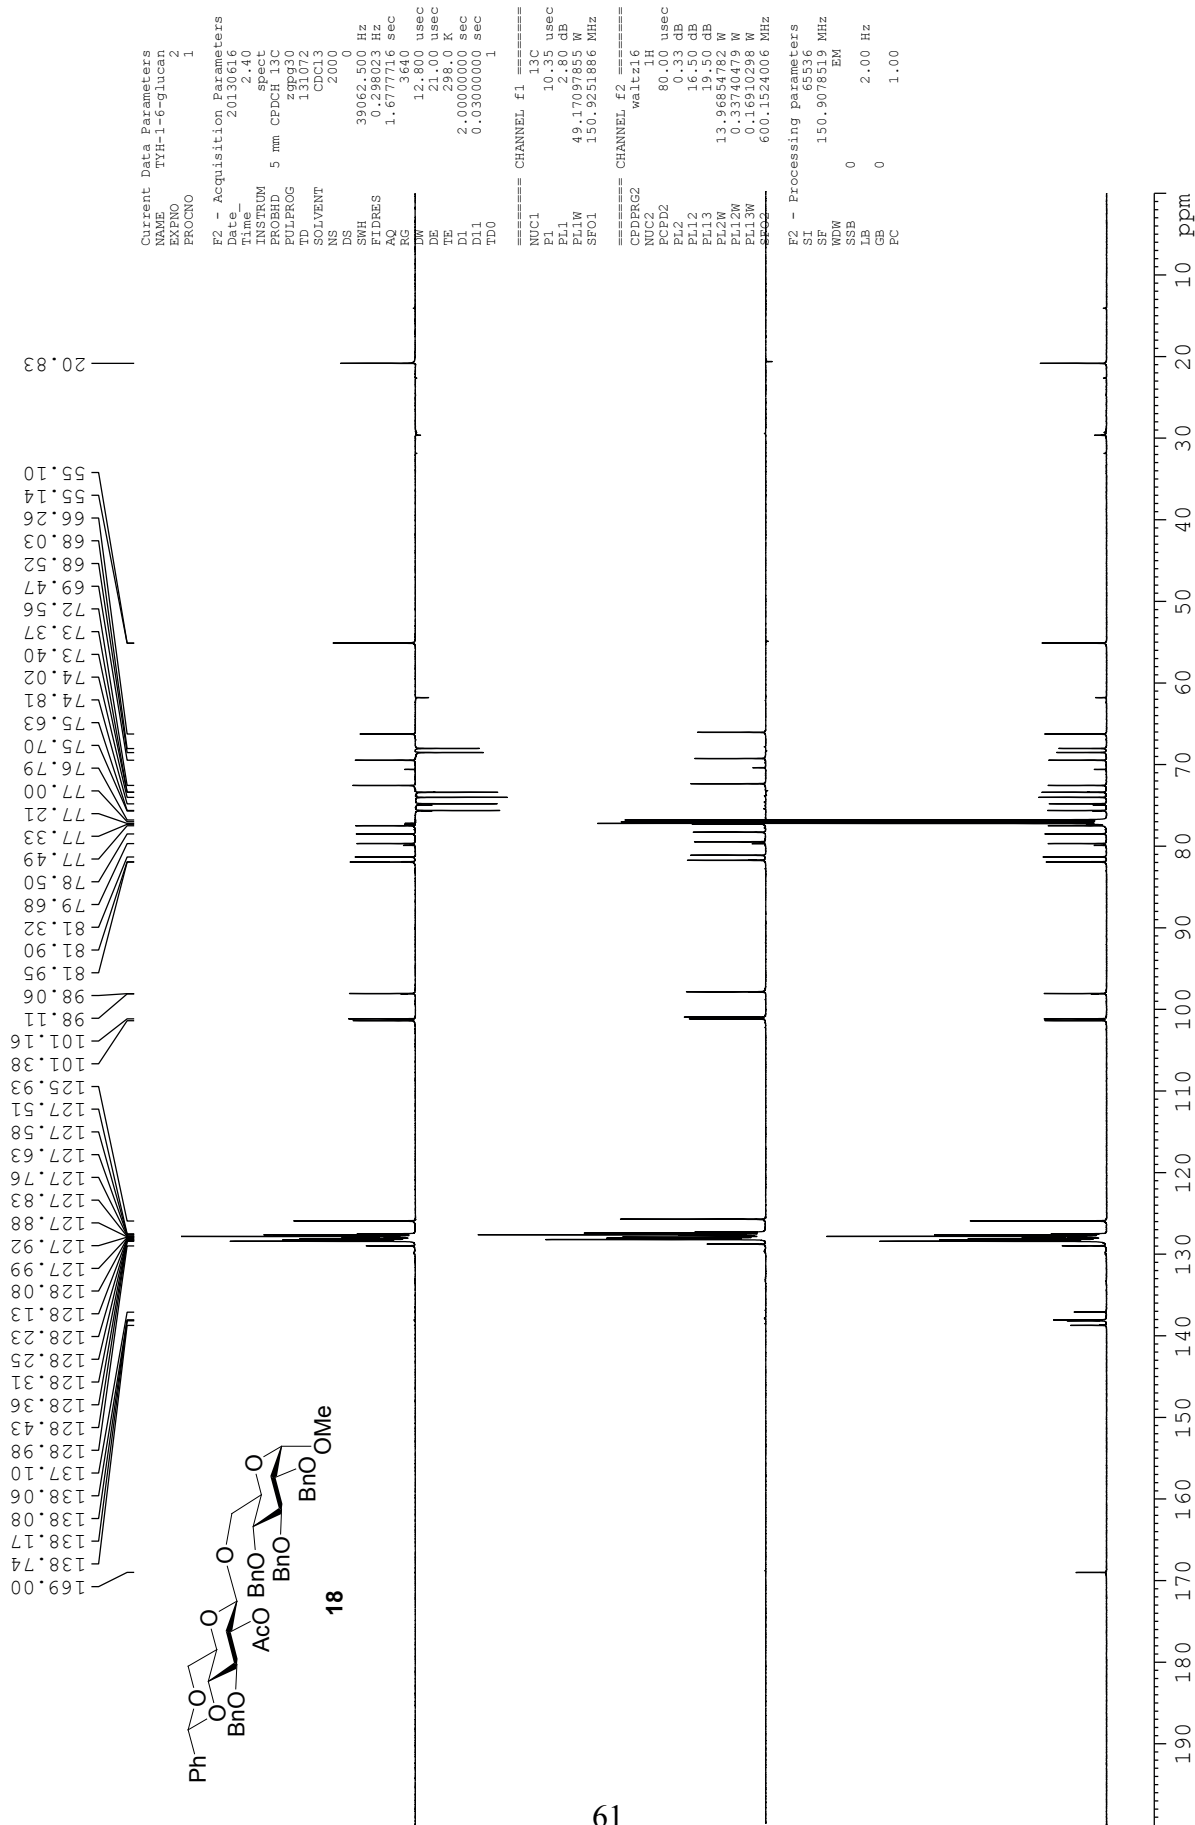

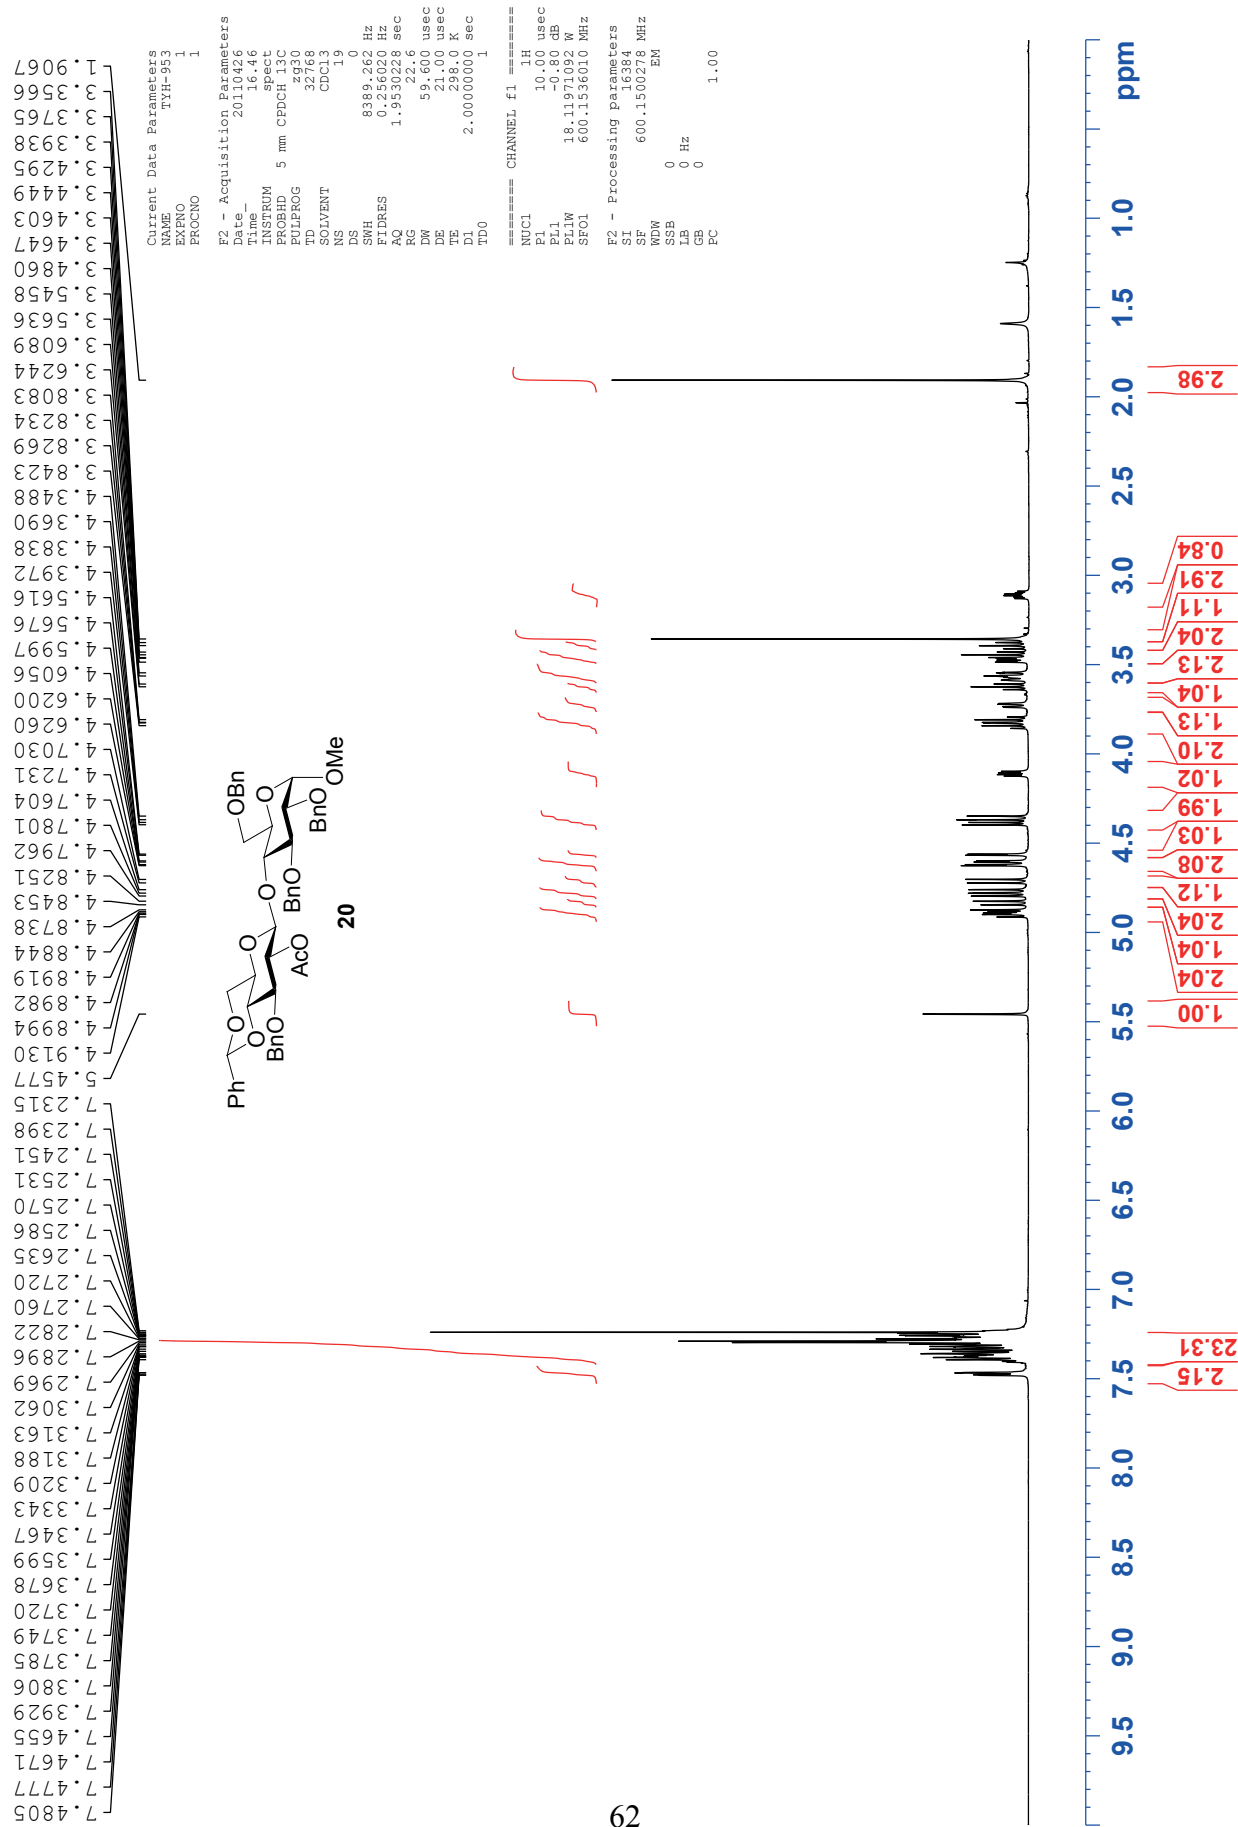

Current Data Parameters  
 NAME 1H-953  
 EXNO 2  
 PROCNO 1

F2 - Acquisition Parameters  
 Date\_ 20110426  
 Time\_ 22.11  
 INSTRUM spect  
 PULPROG zgpg30  
 FIDRES 5 mm CPDCHL3C  
 TD 65536  
 SFO1 131.072  
 SOLVENT CDCl3  
 NS 600  
 DS 0  
 SWH 39370.078 Hz  
 FIDRES 0.300370 Hz  
 AQ 1.6646644 sec

===== CHANNEL f1 =====  
 NUC1 13C  
 P1 10.50 usec  
 PL1 2.80 dB  
 PL1W 49.17097855 W  
 SFO1 150.9251915 MHz

===== CHANNEL f2 =====  
 CPDPRG2 waltz16  
 NUC2 1H  
 PCPD2 80.00 usec  
 PL2 0.33 dB  
 PL2W 17.18 dB  
 PL3 20.18 dB  
 PL3W 13.36854782 W  
 PL4W 0.28850359 W  
 PL5W 0.14459431 W  
 SFO2 600.1559010 MHz

F2 - Processing parameters  
 SI 65536  
 SF 150.9078498 MHz  
 WDW EM  
 SSB 0  
 LB 0  
 GB 0  
 PC 1.00

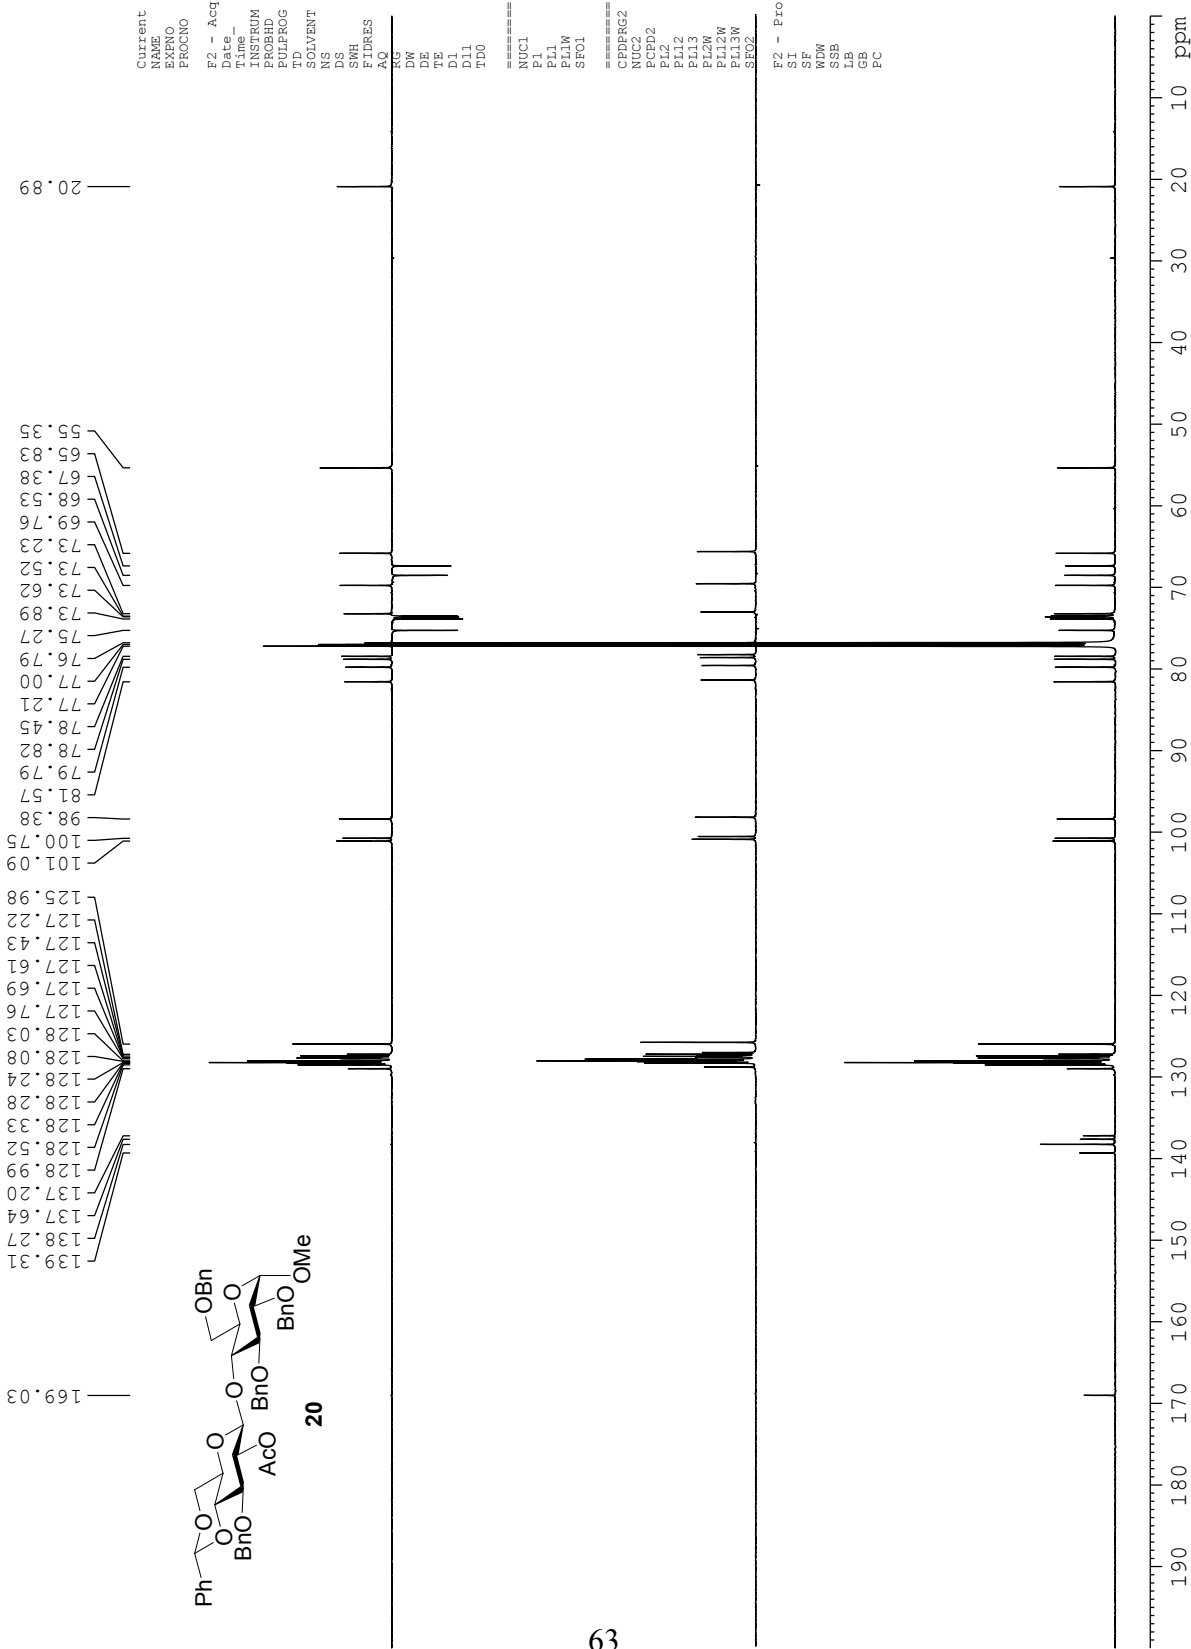

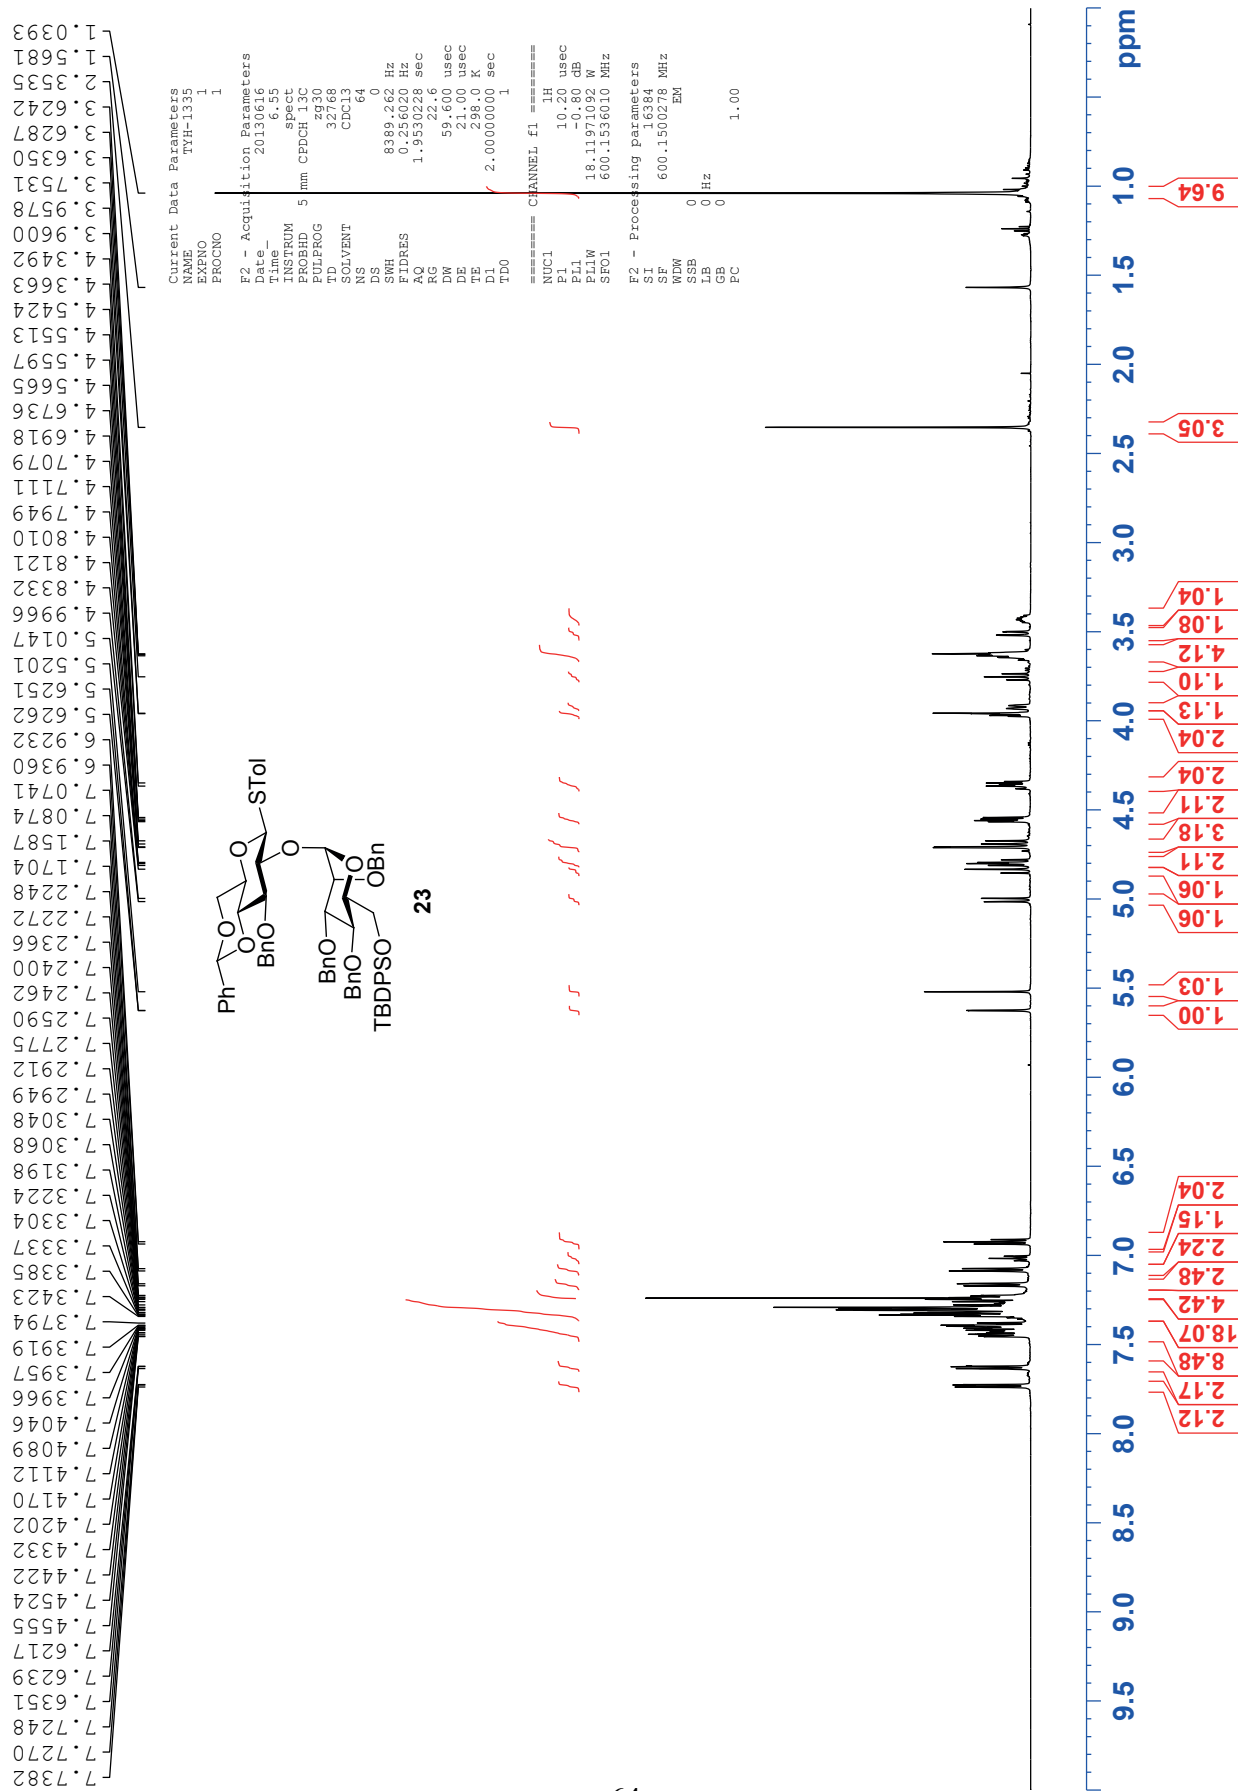



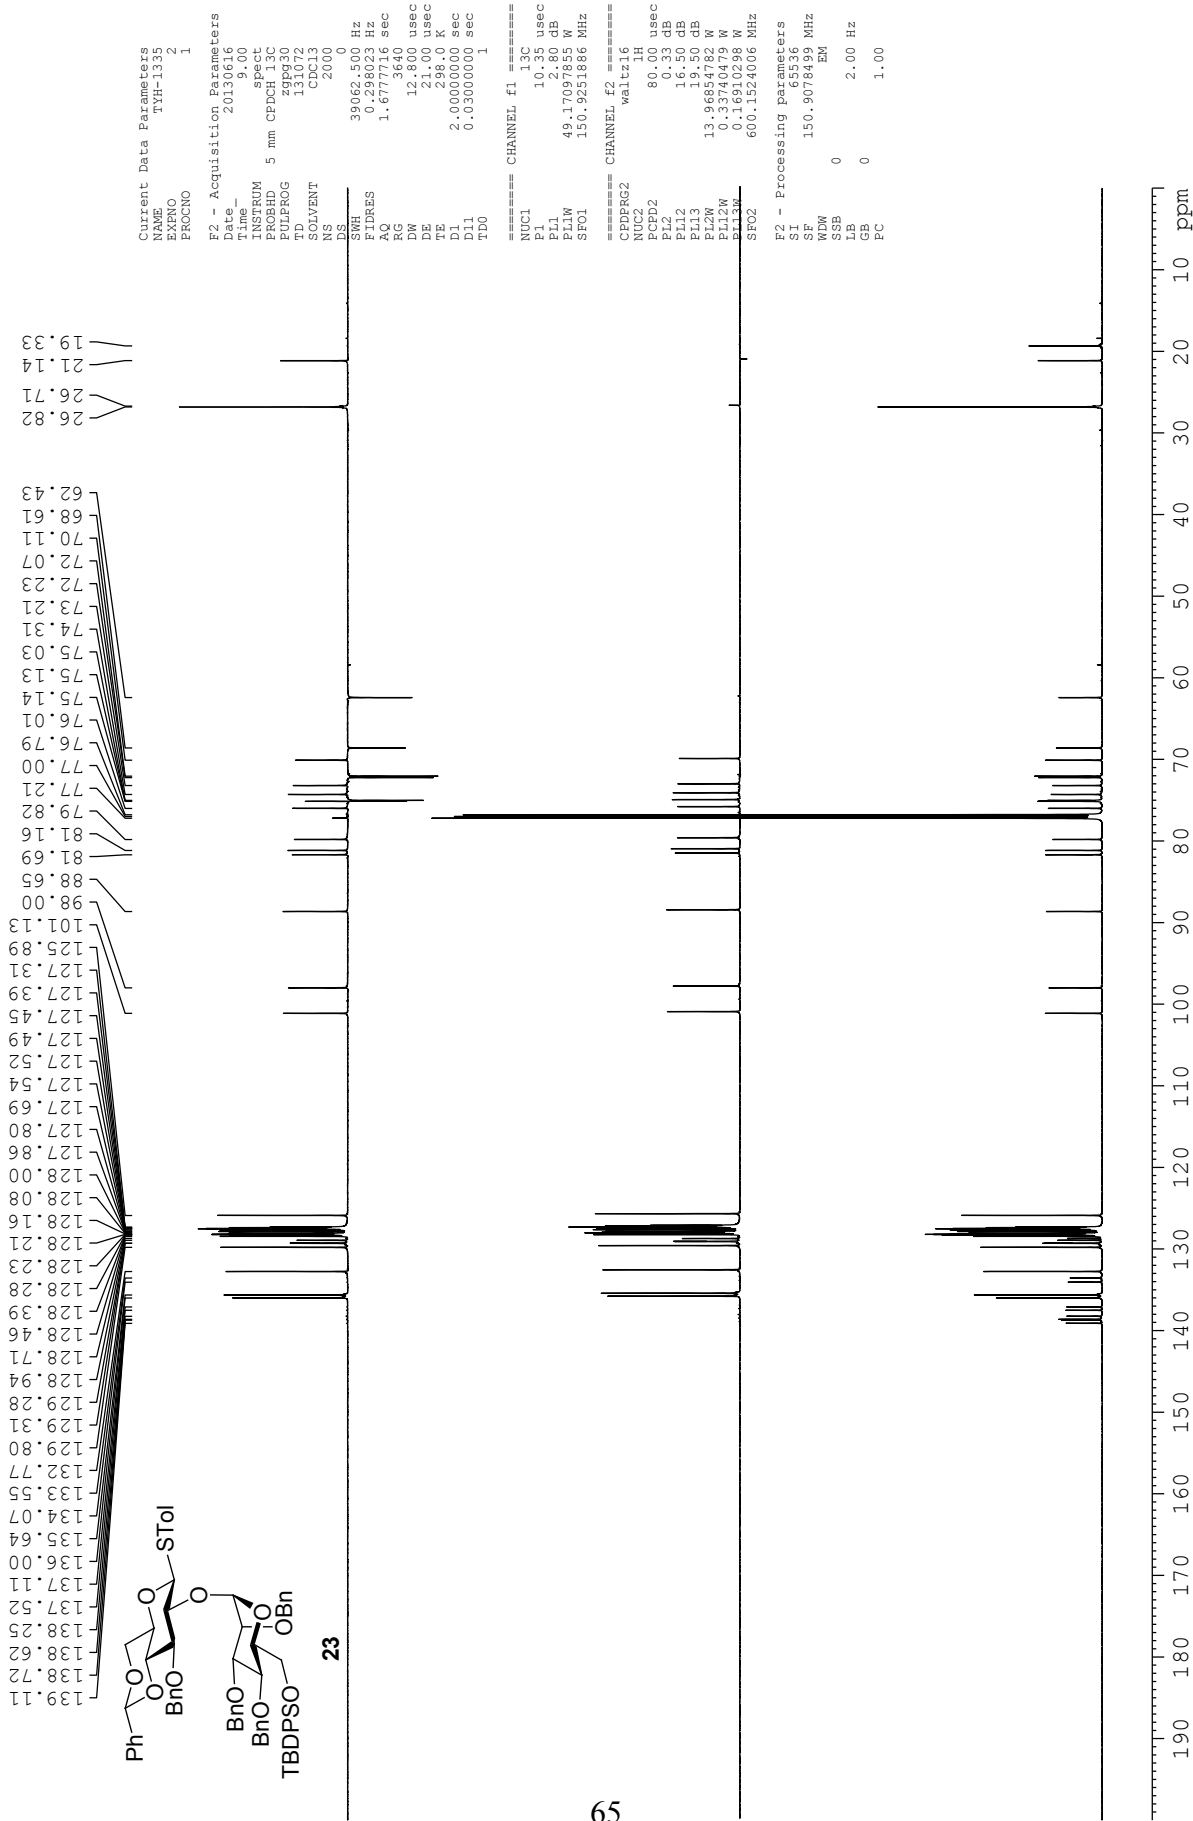

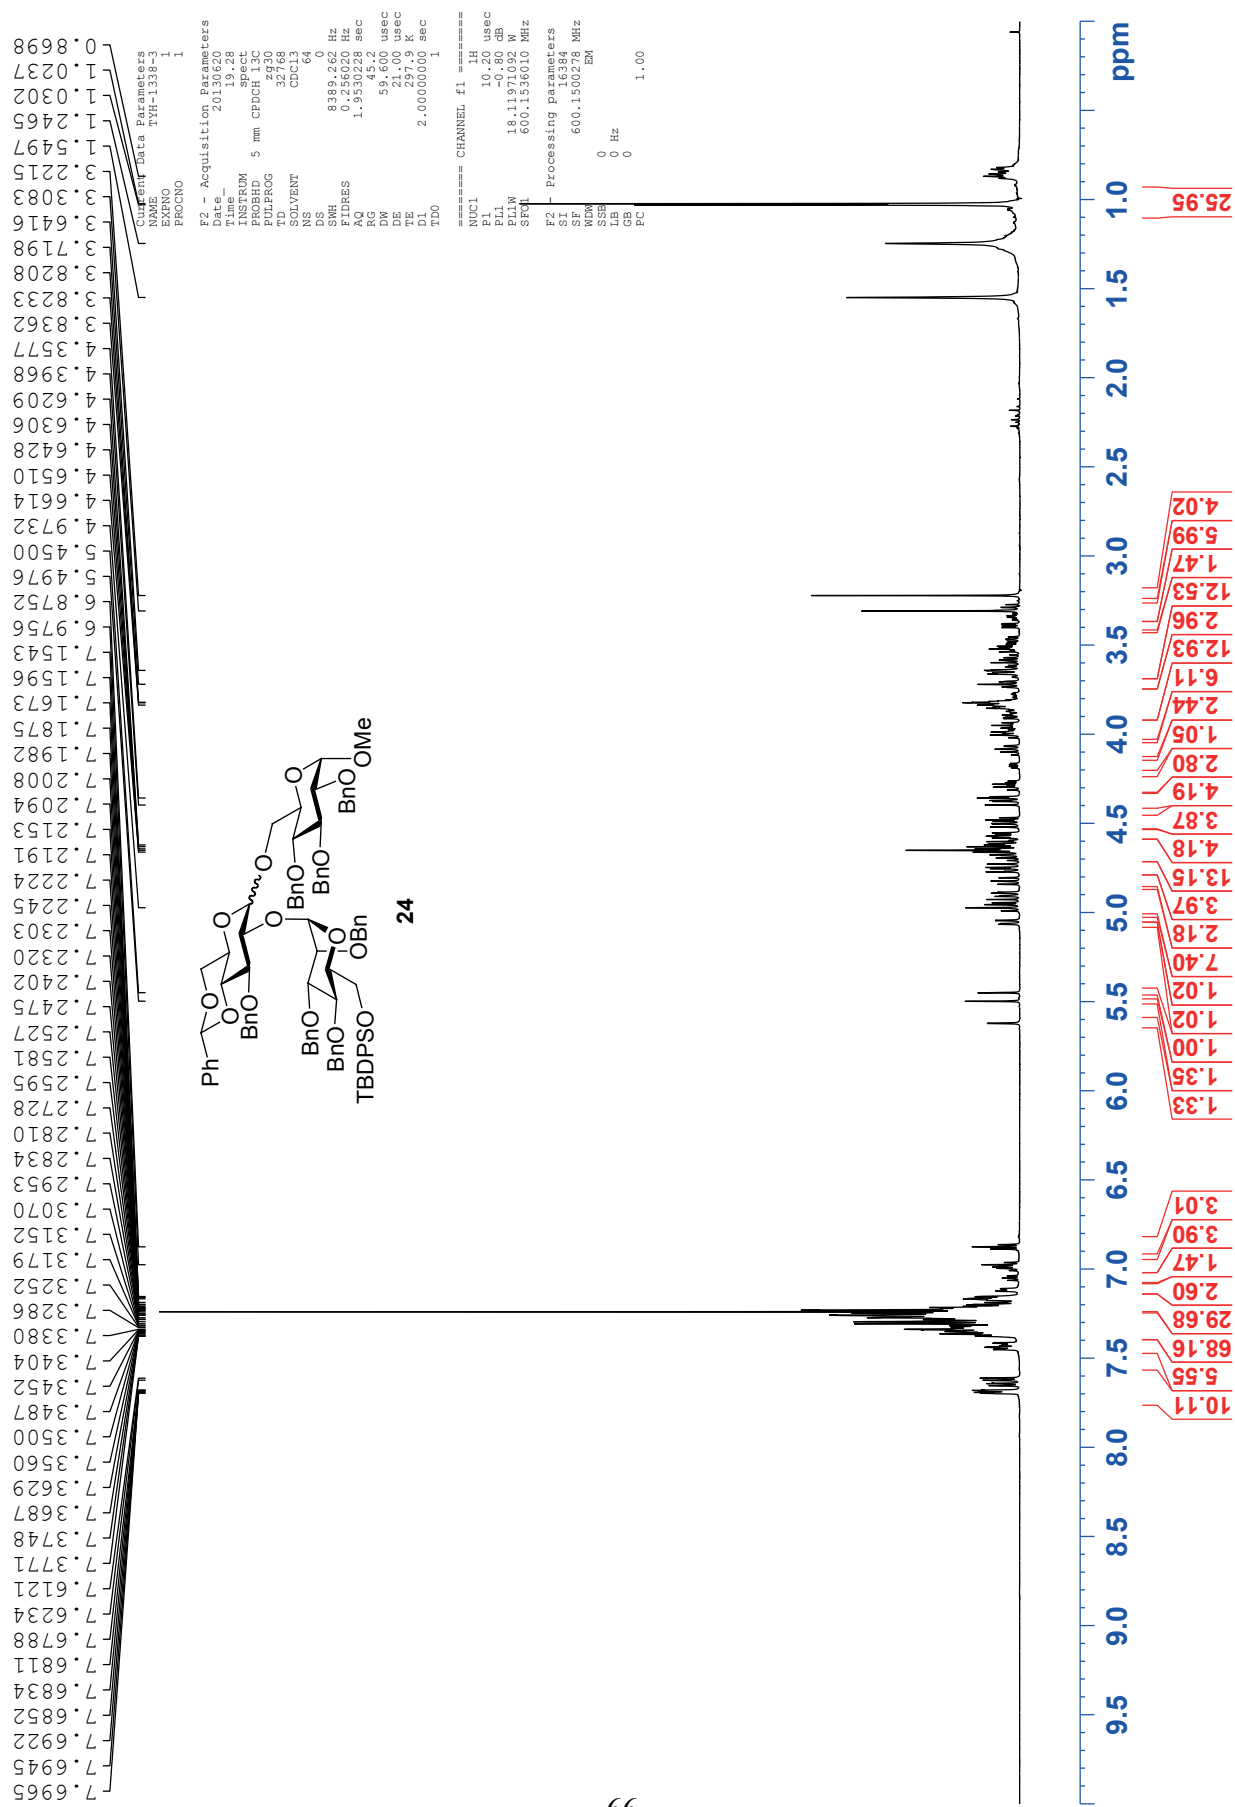



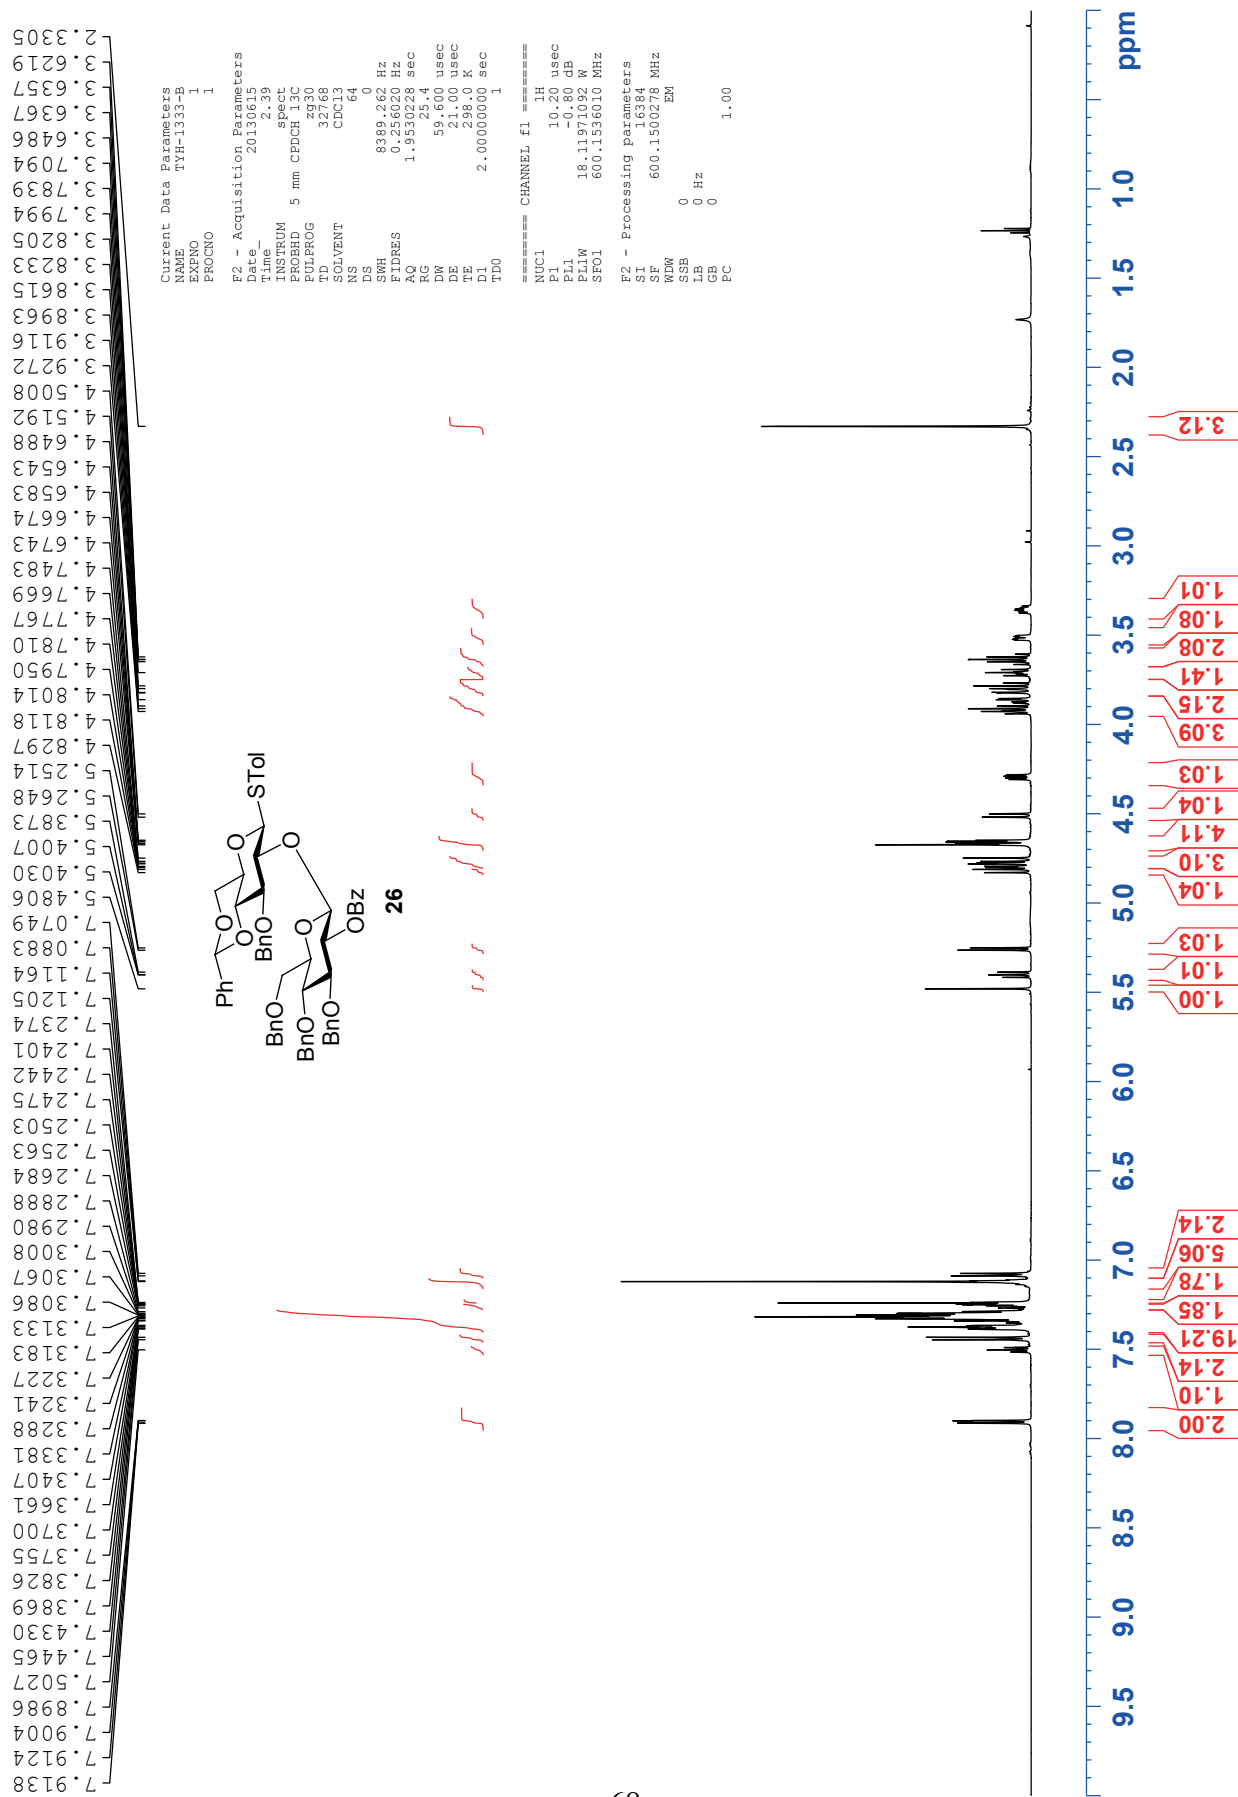

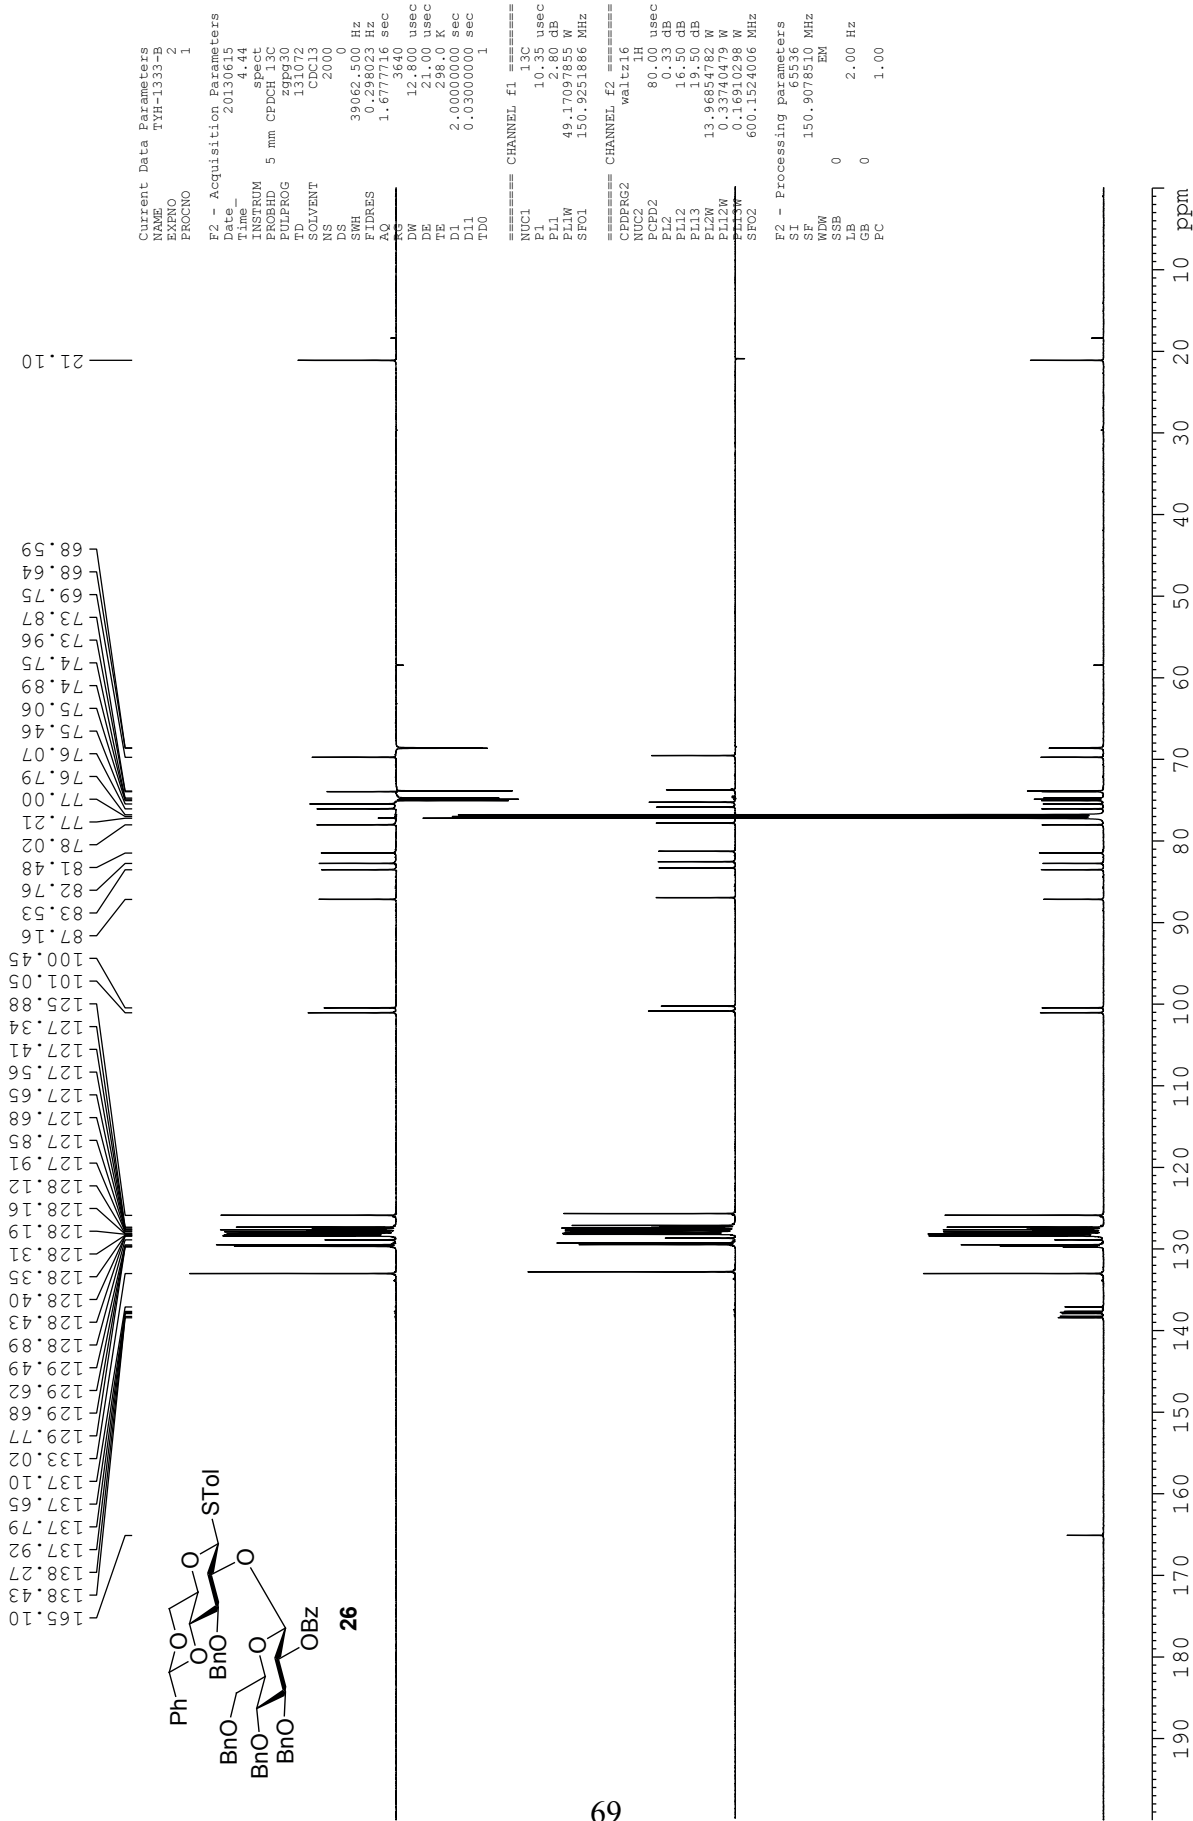



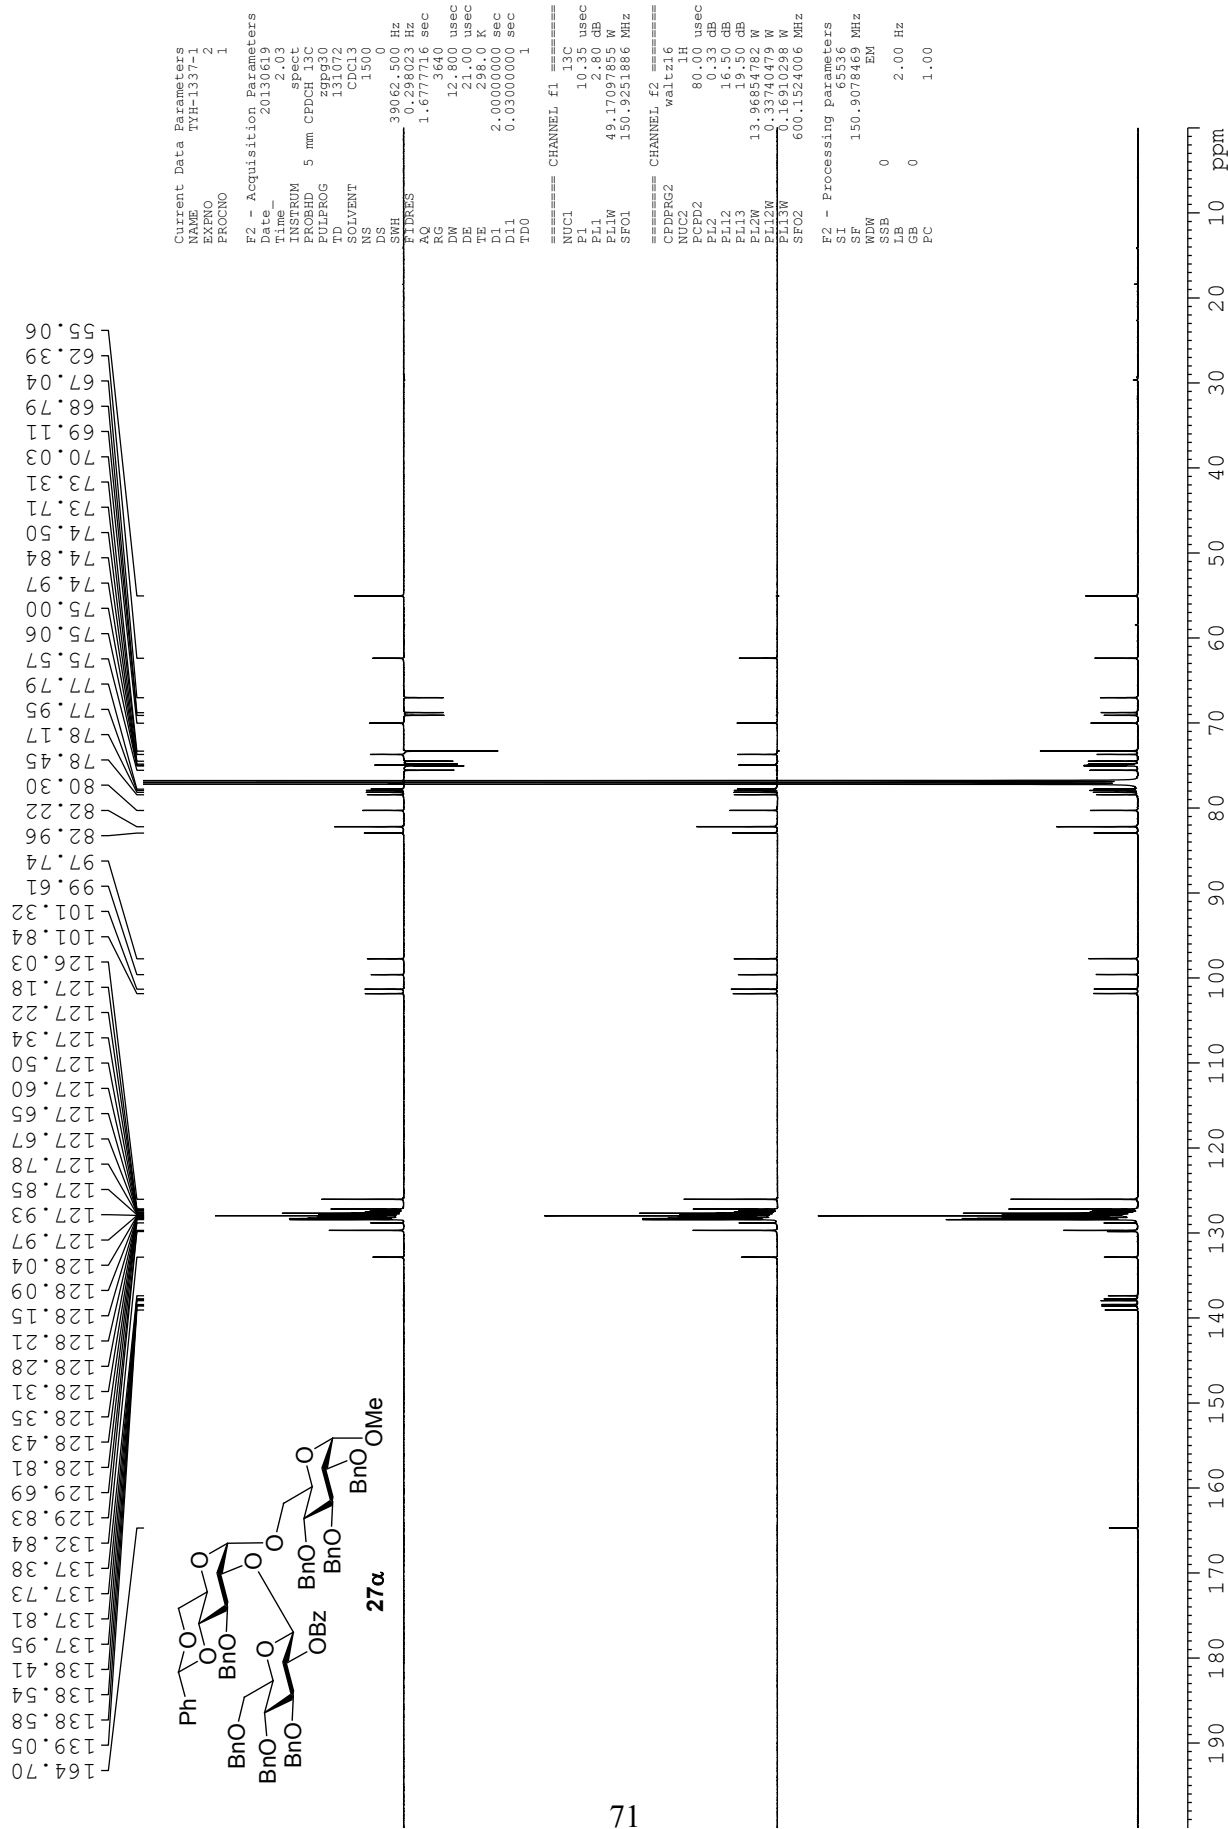

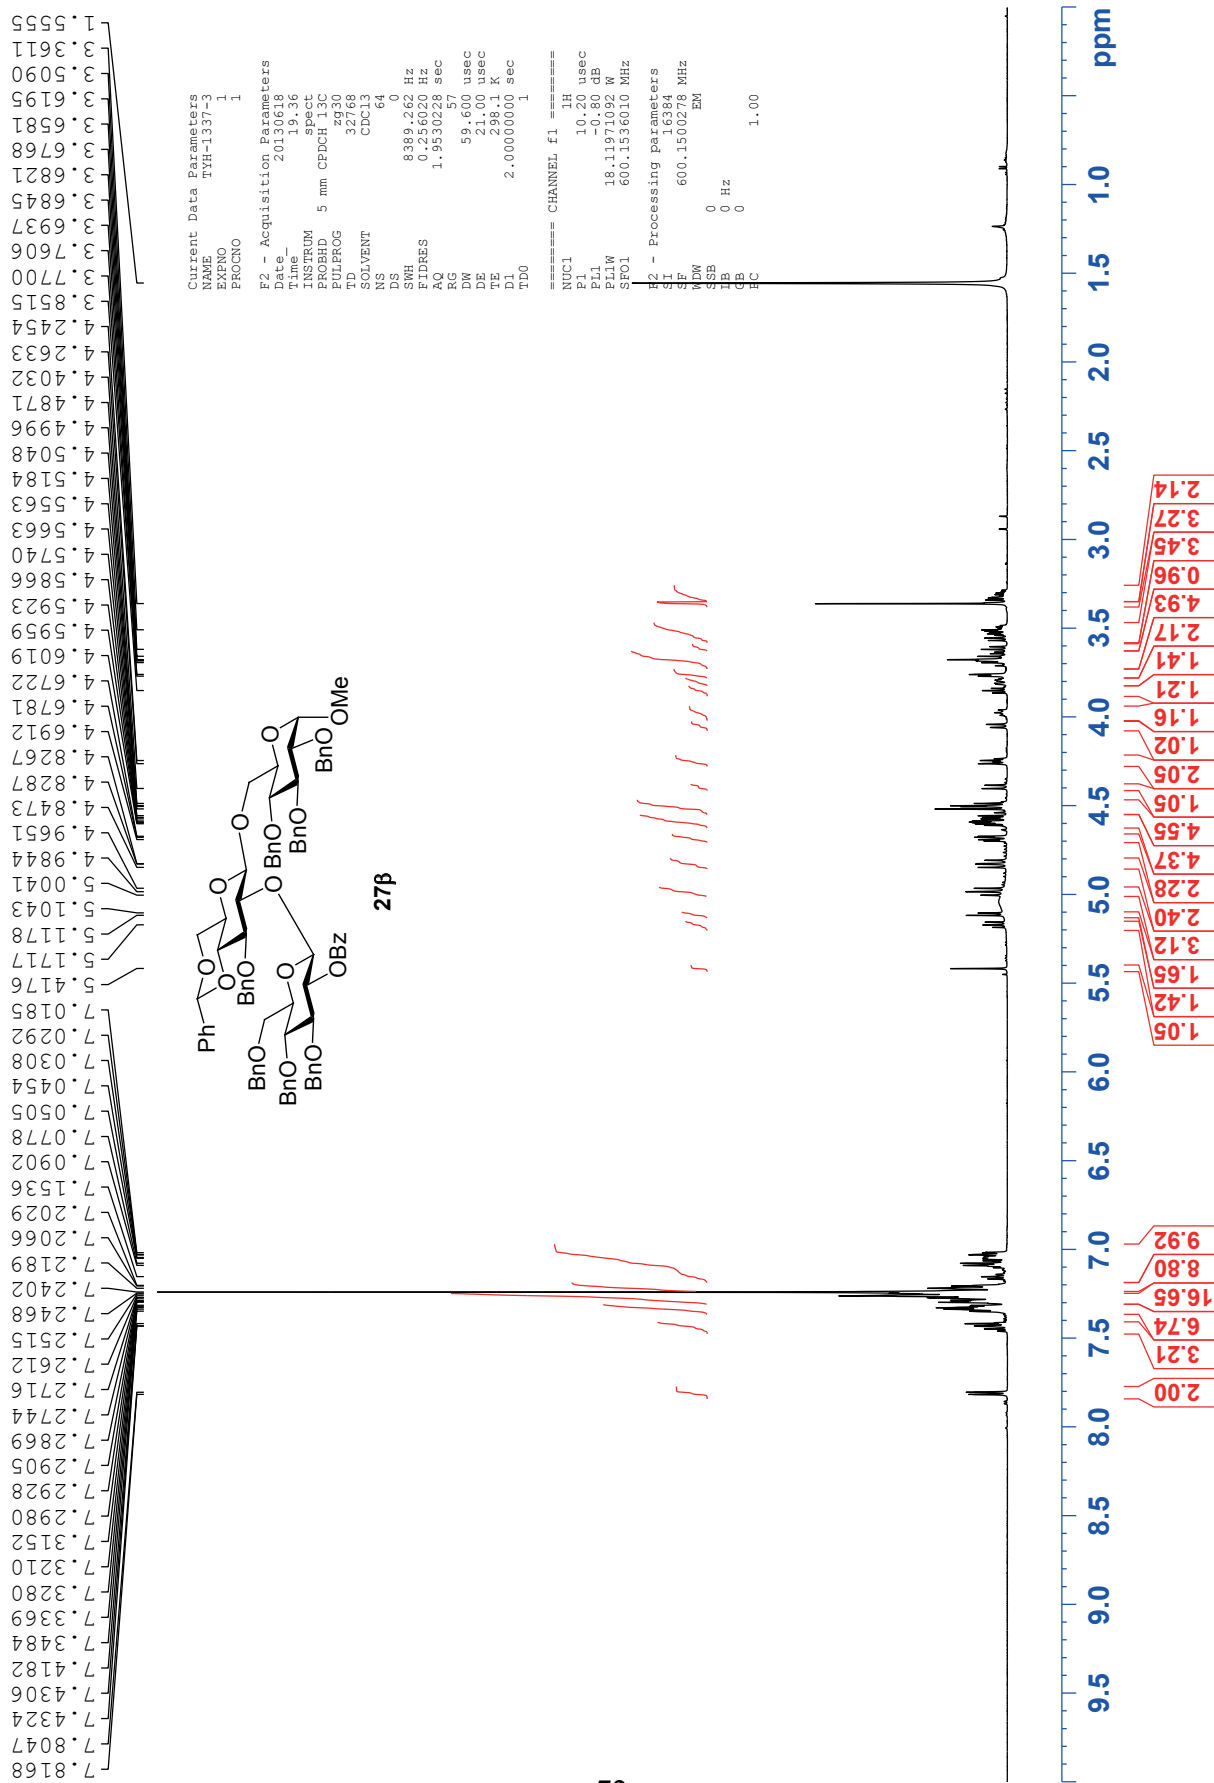



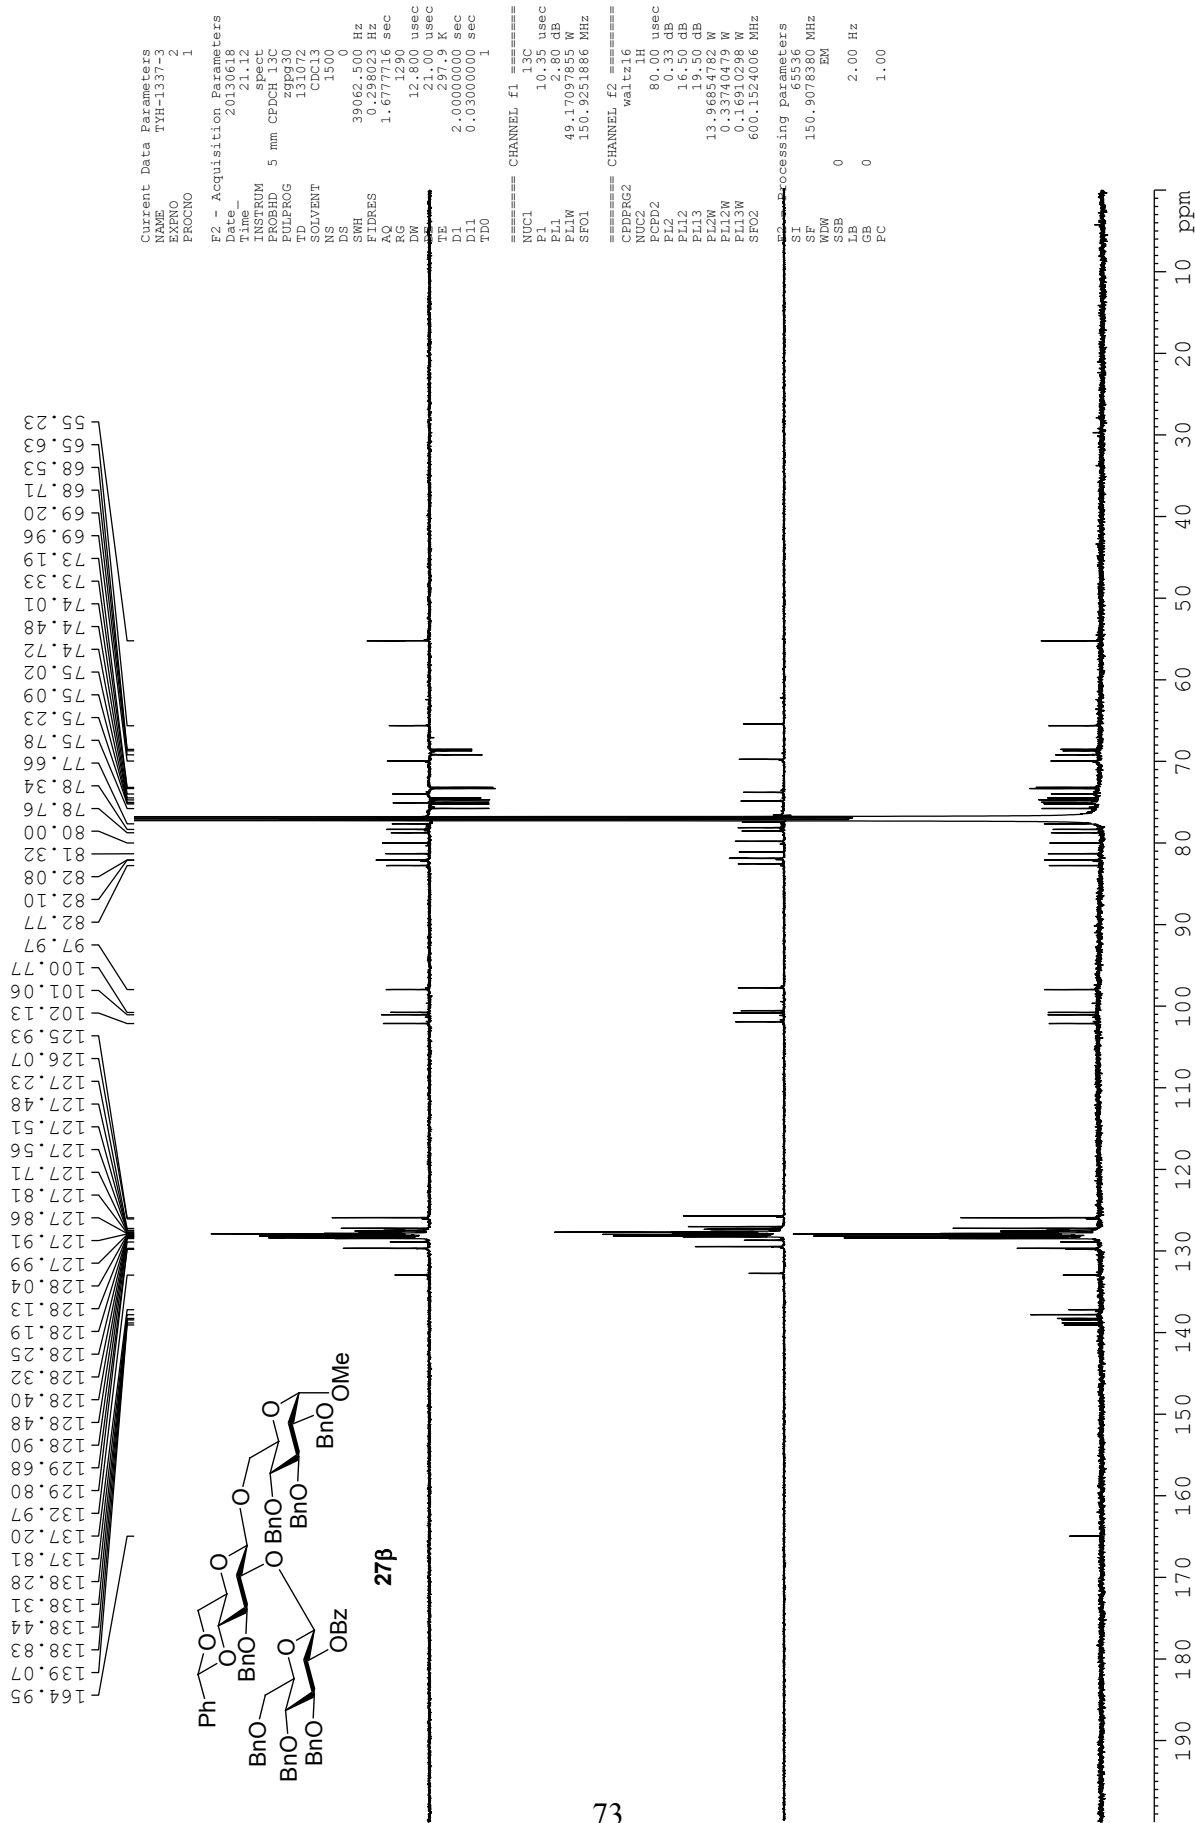

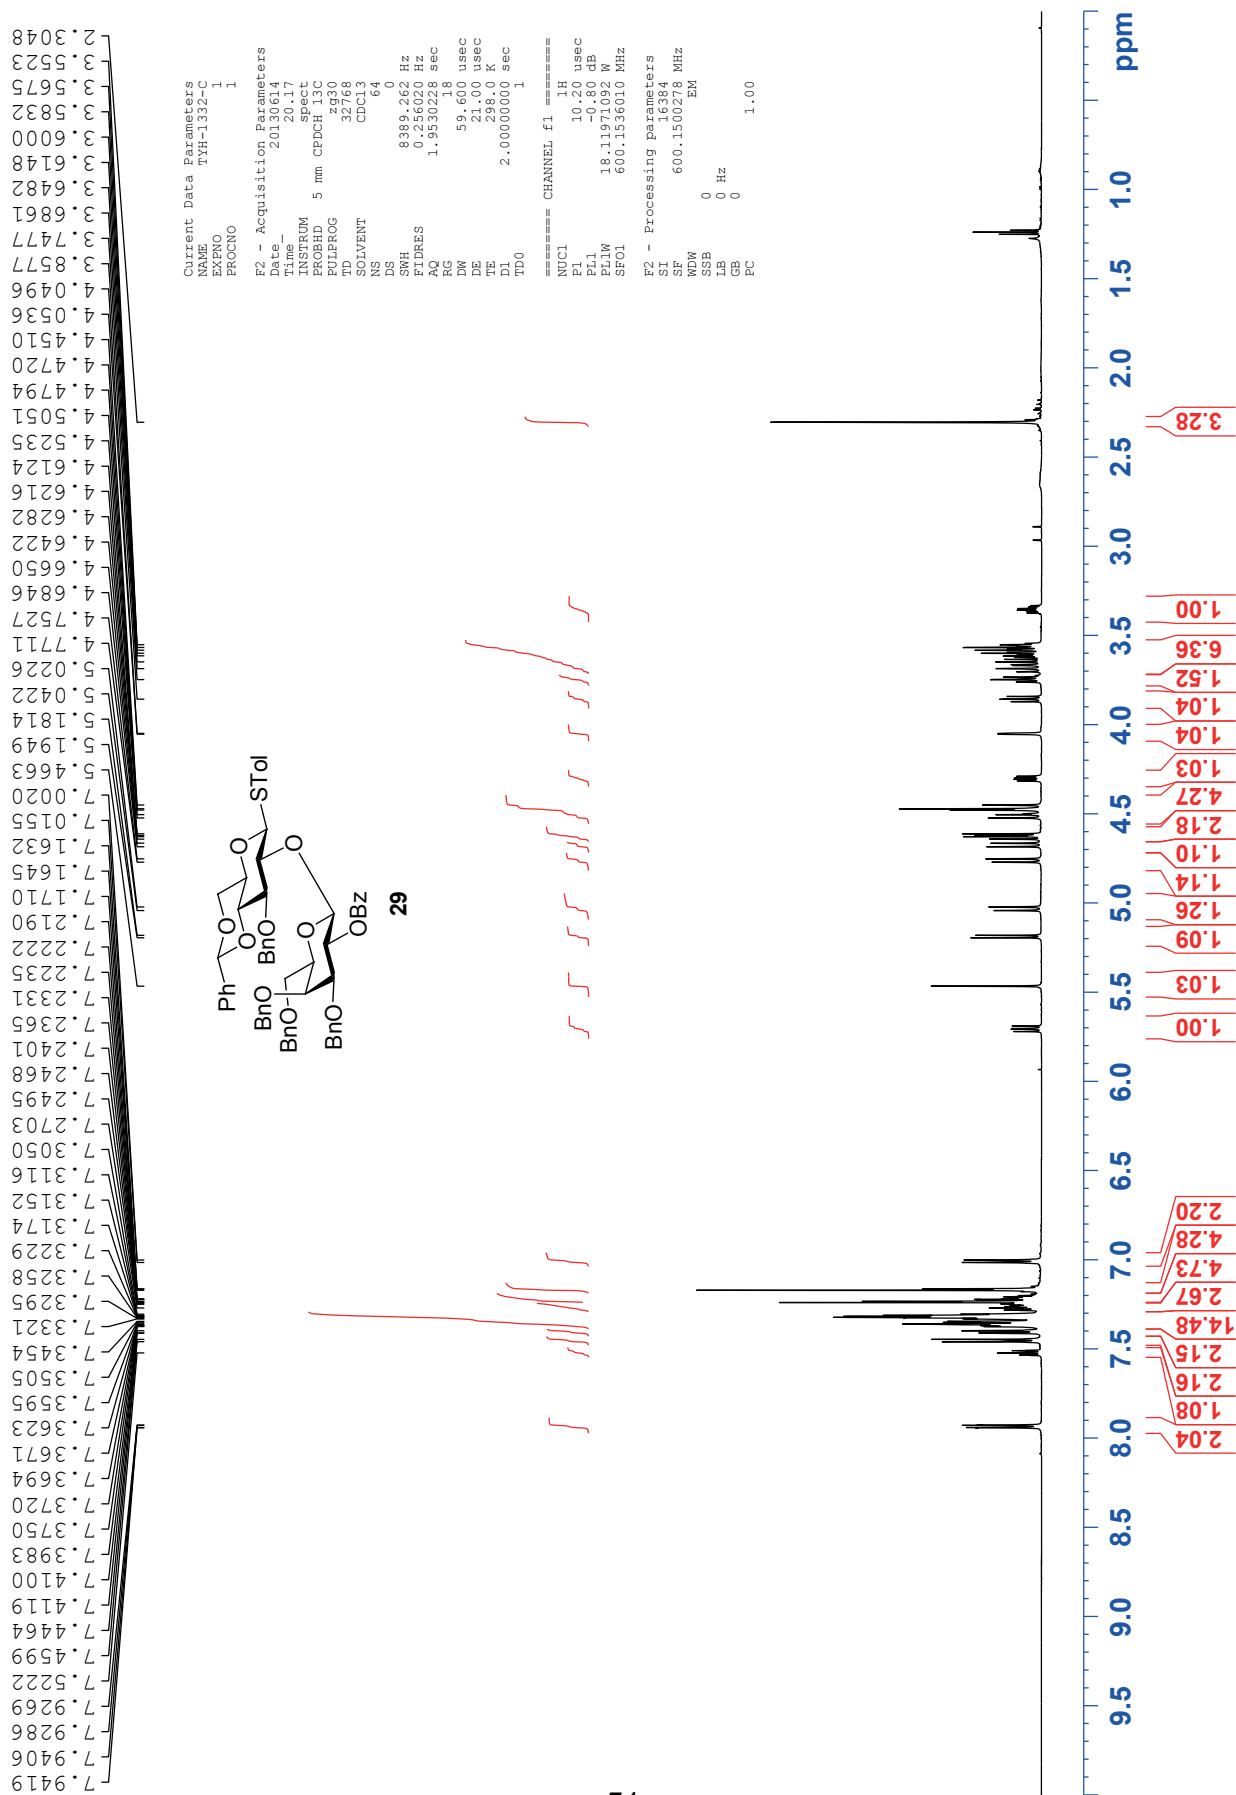

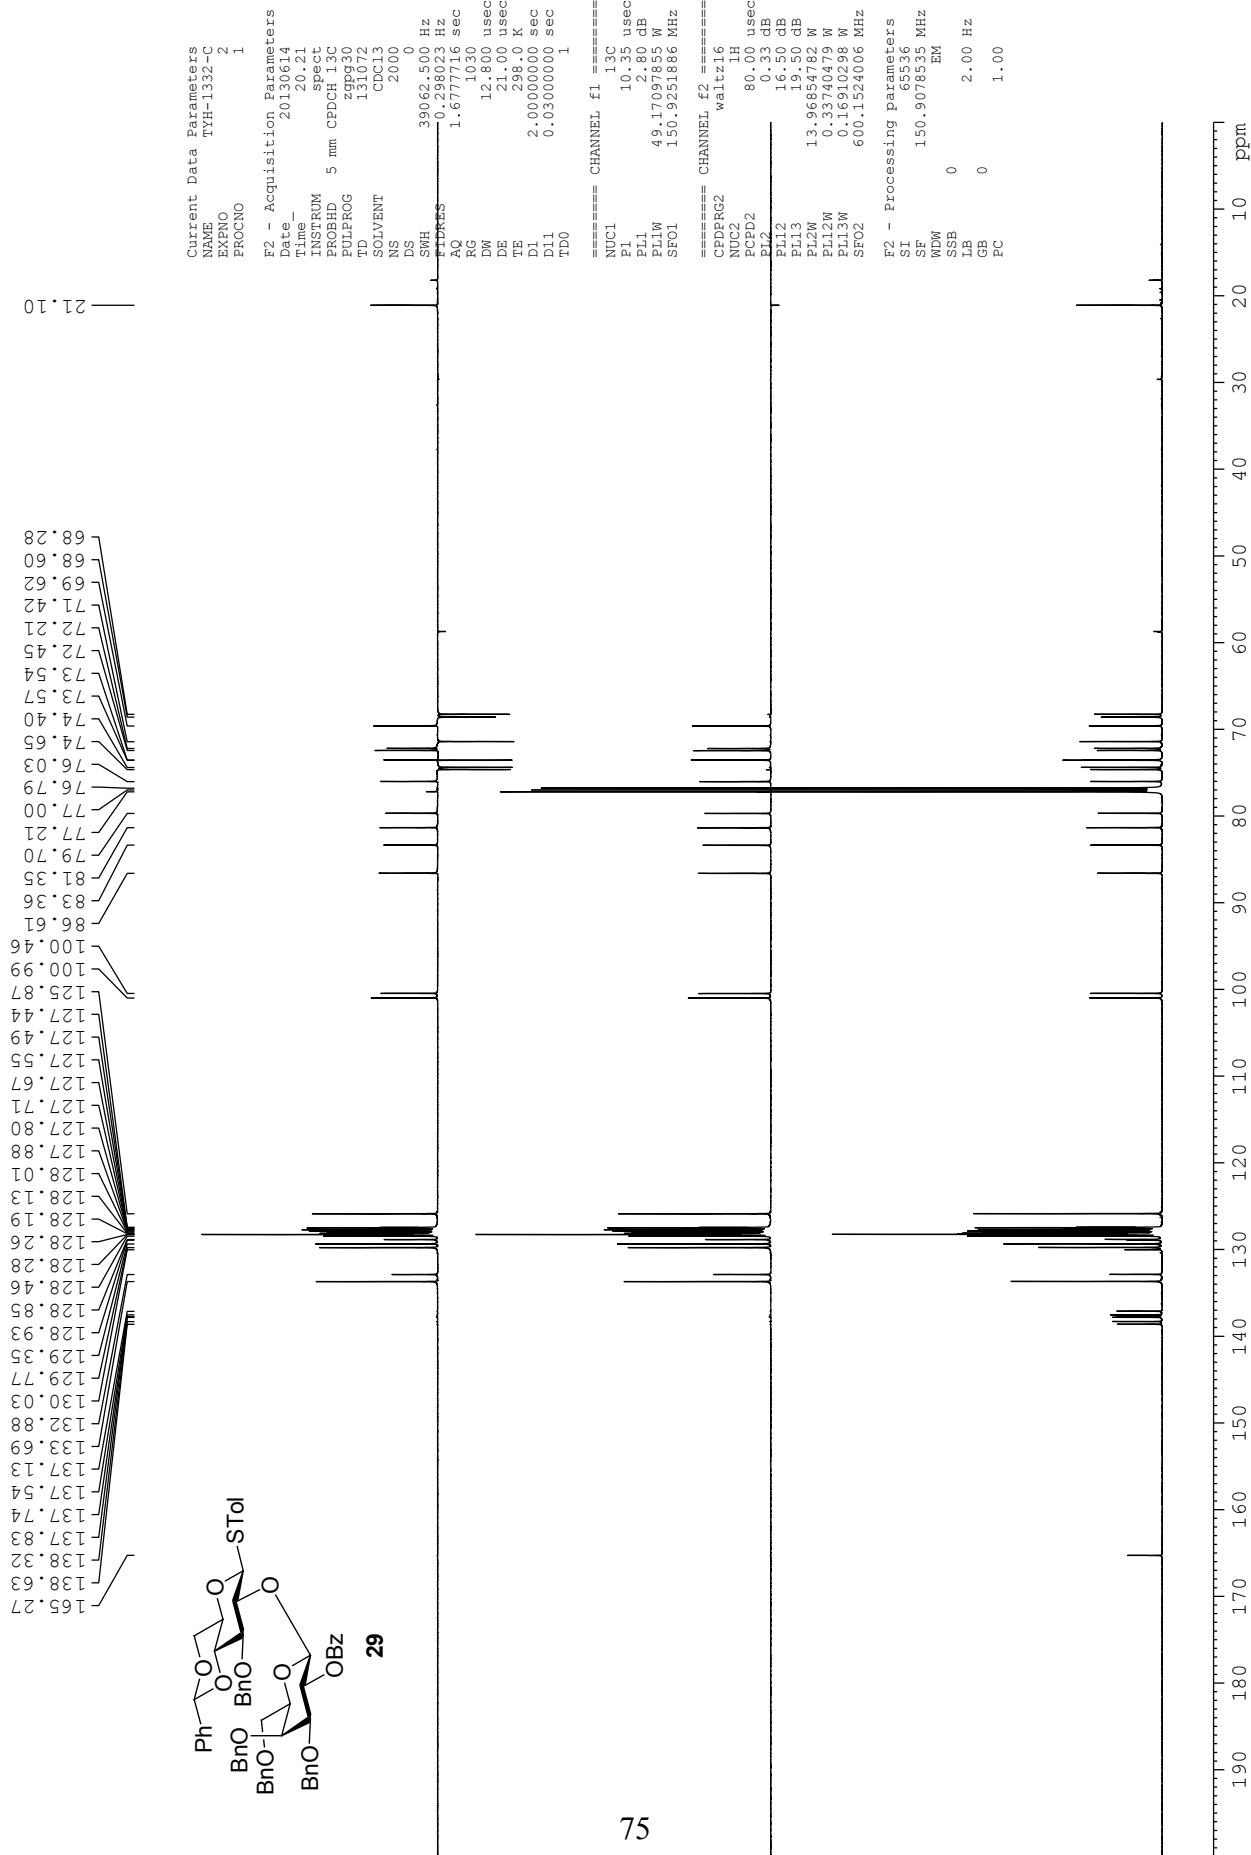

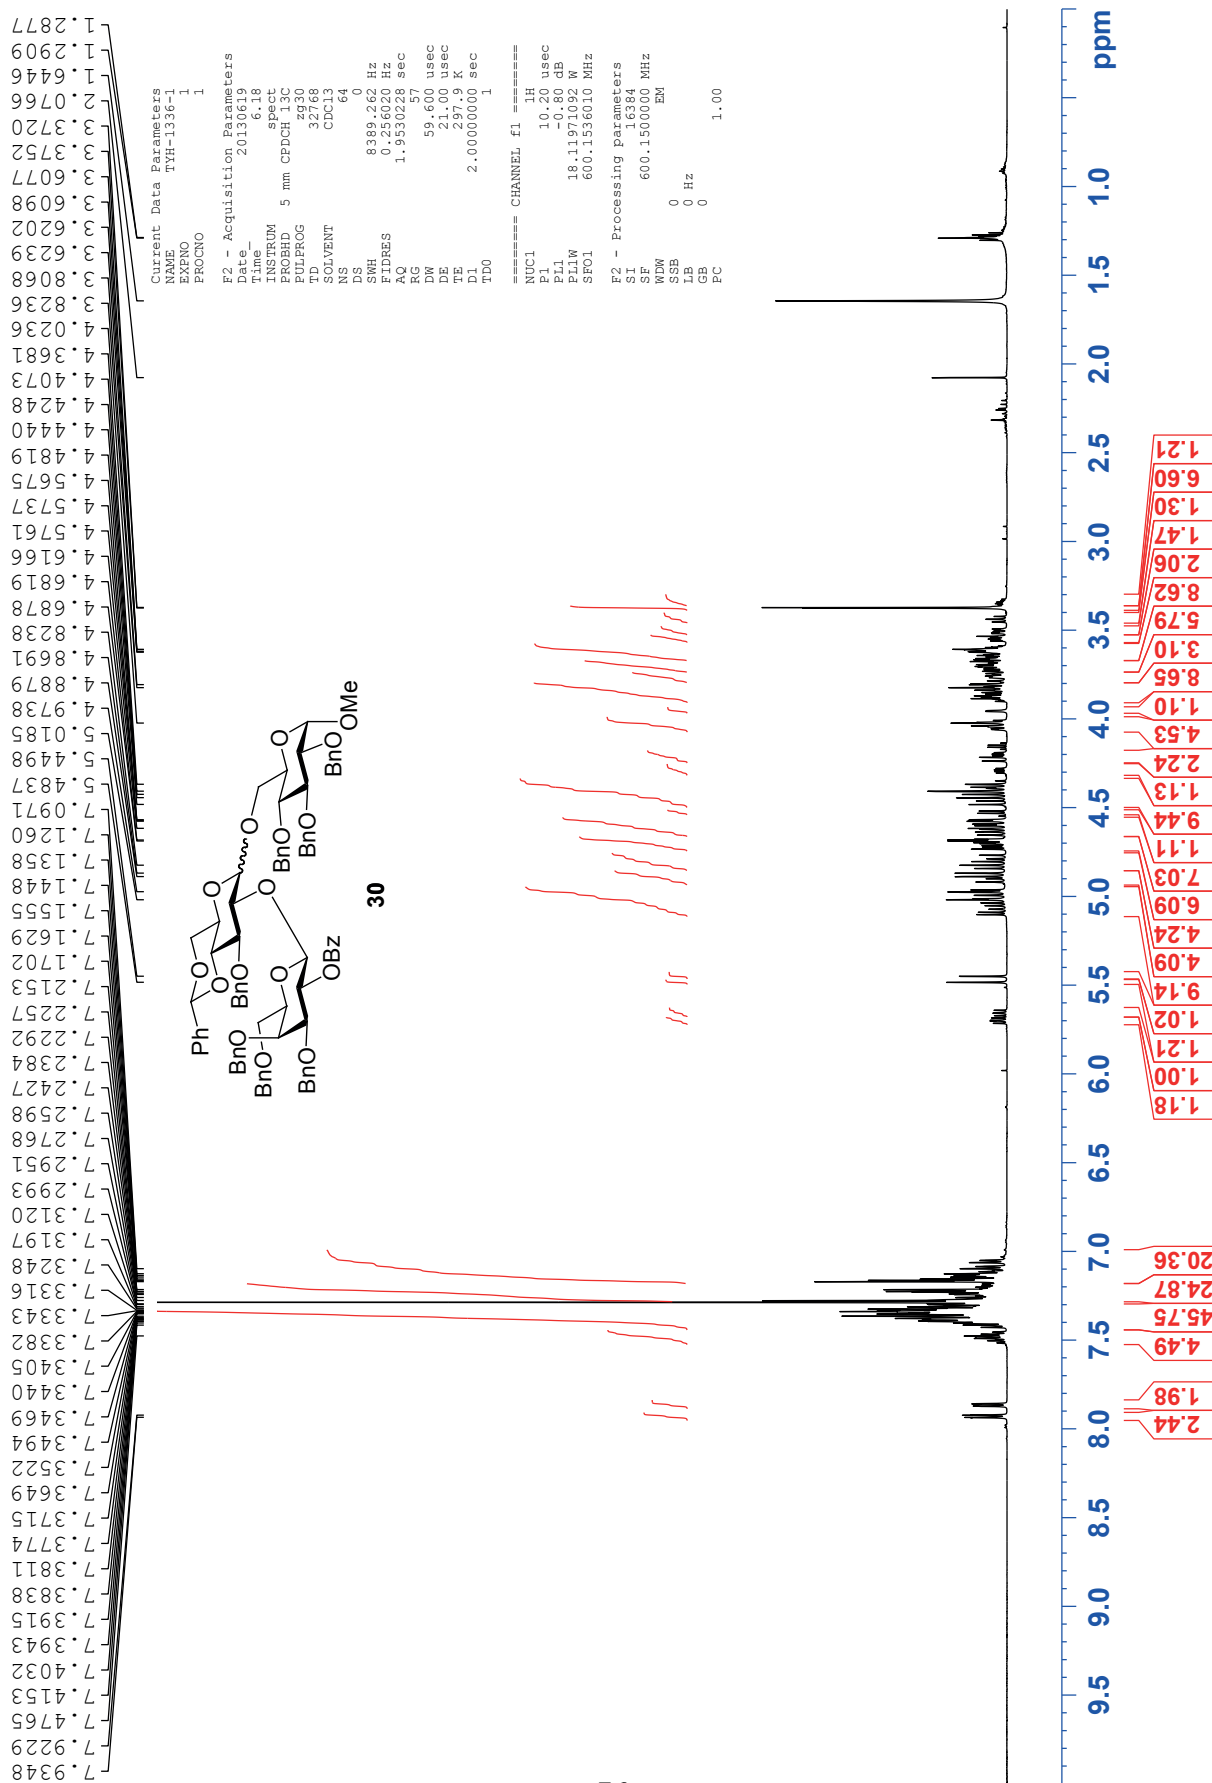

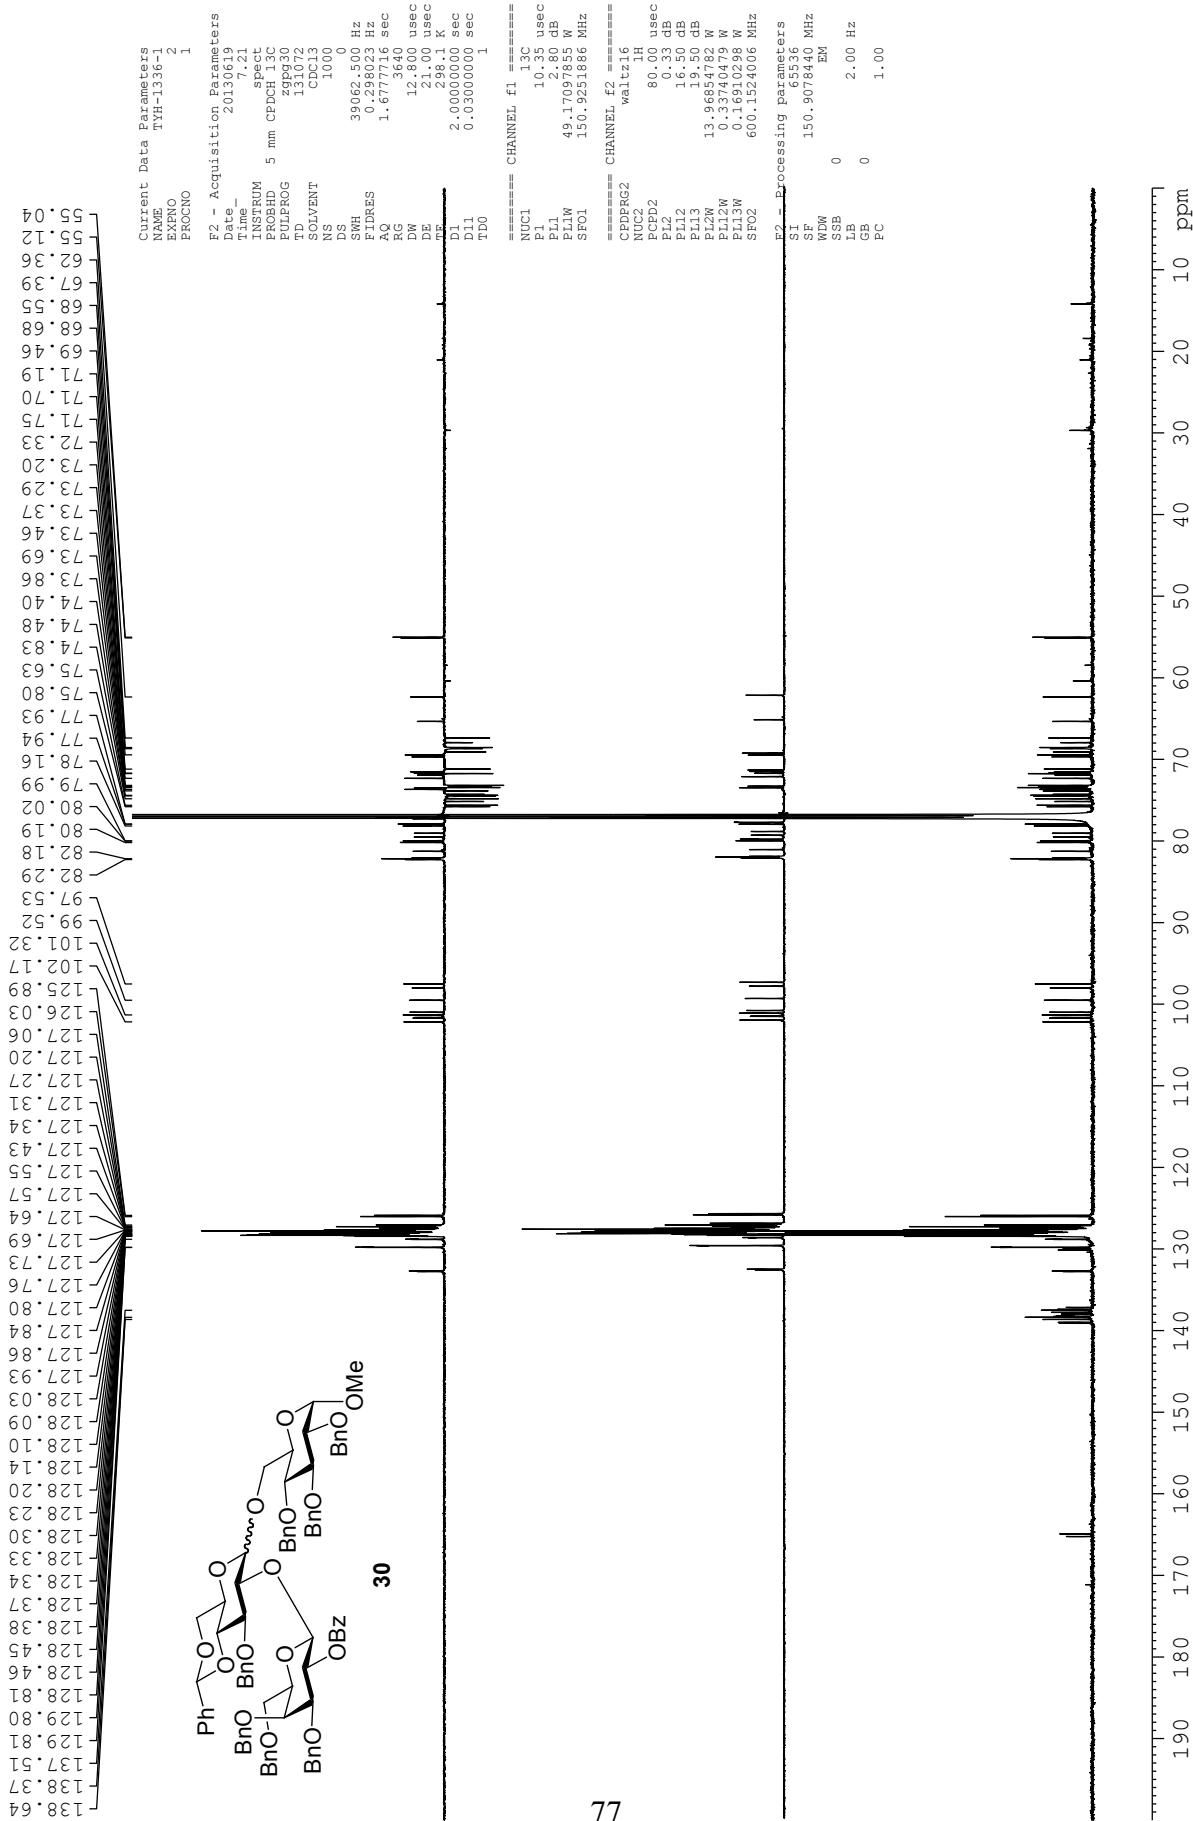

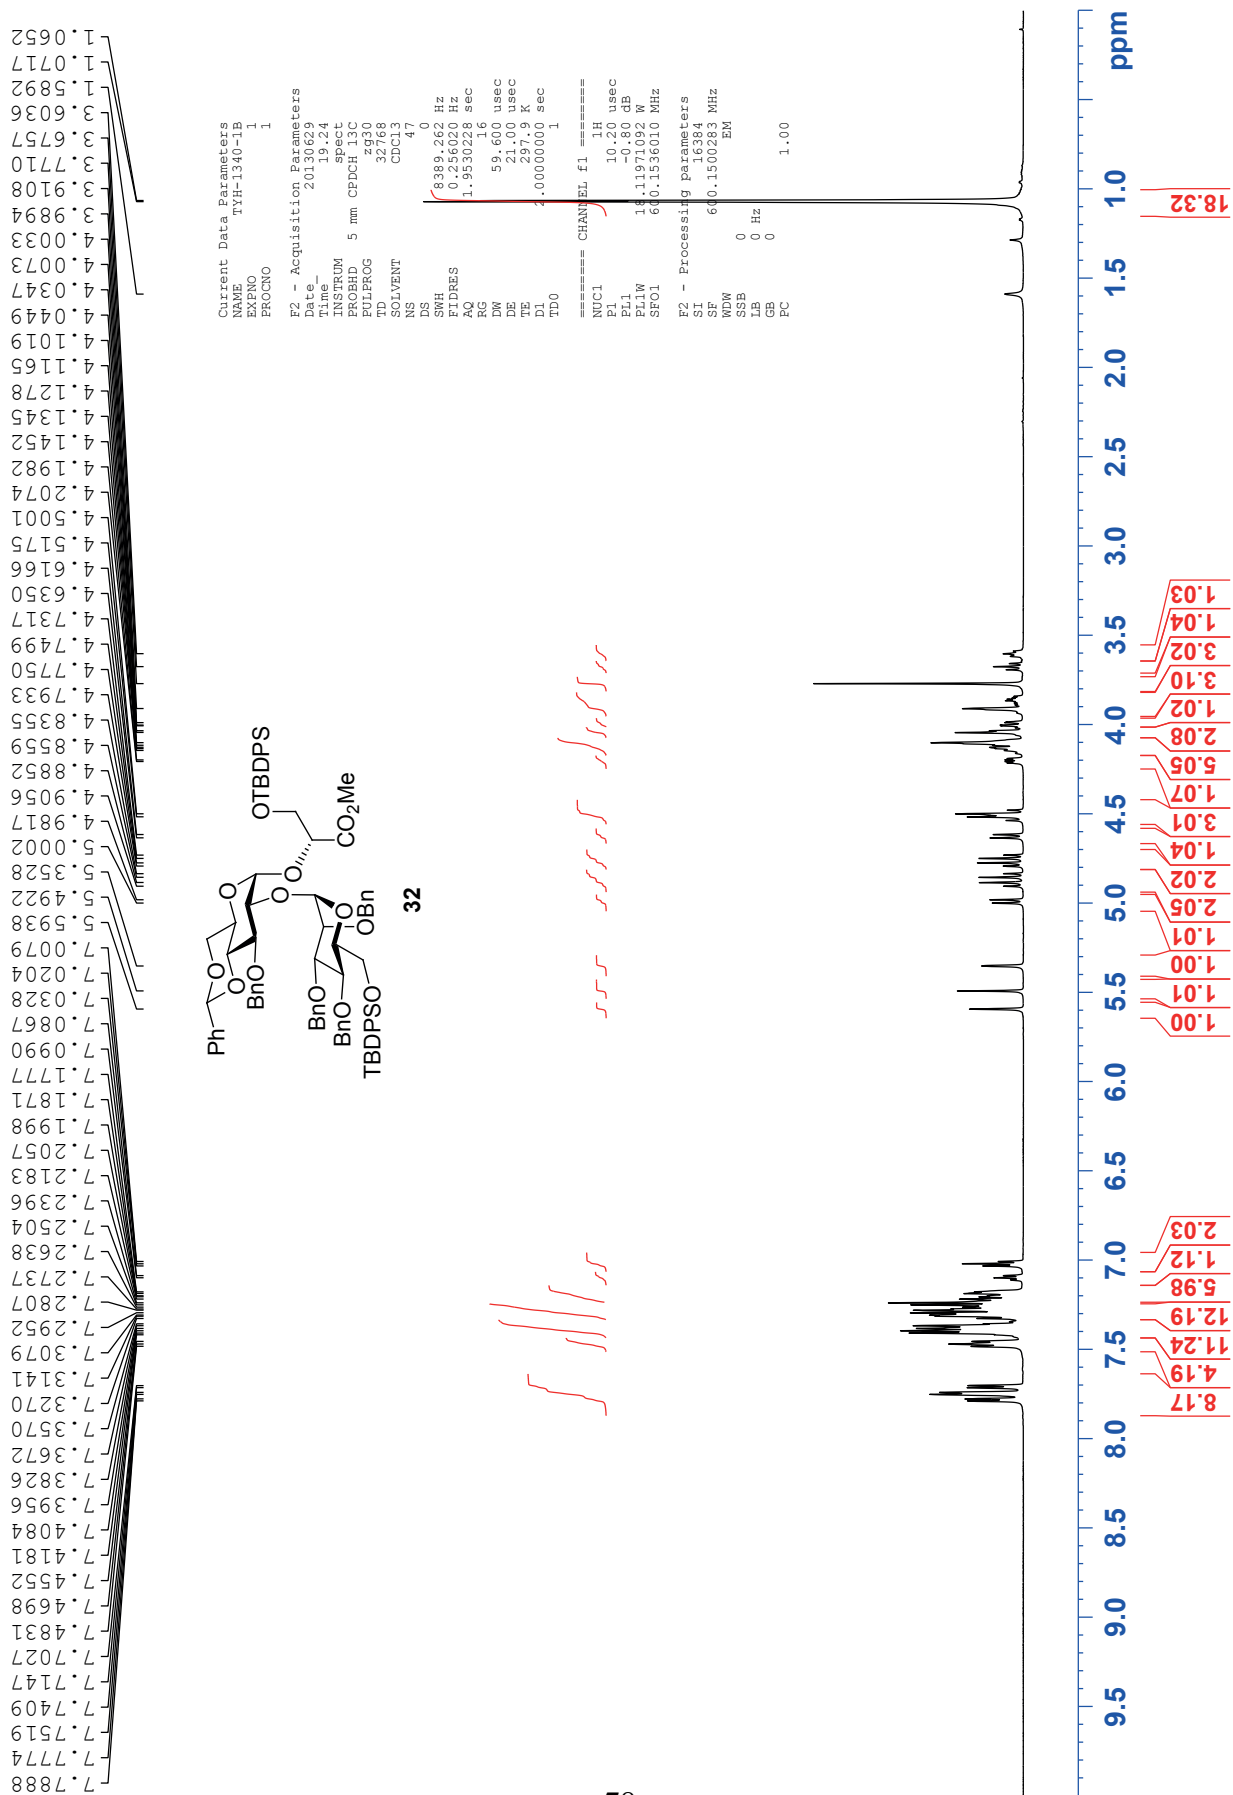

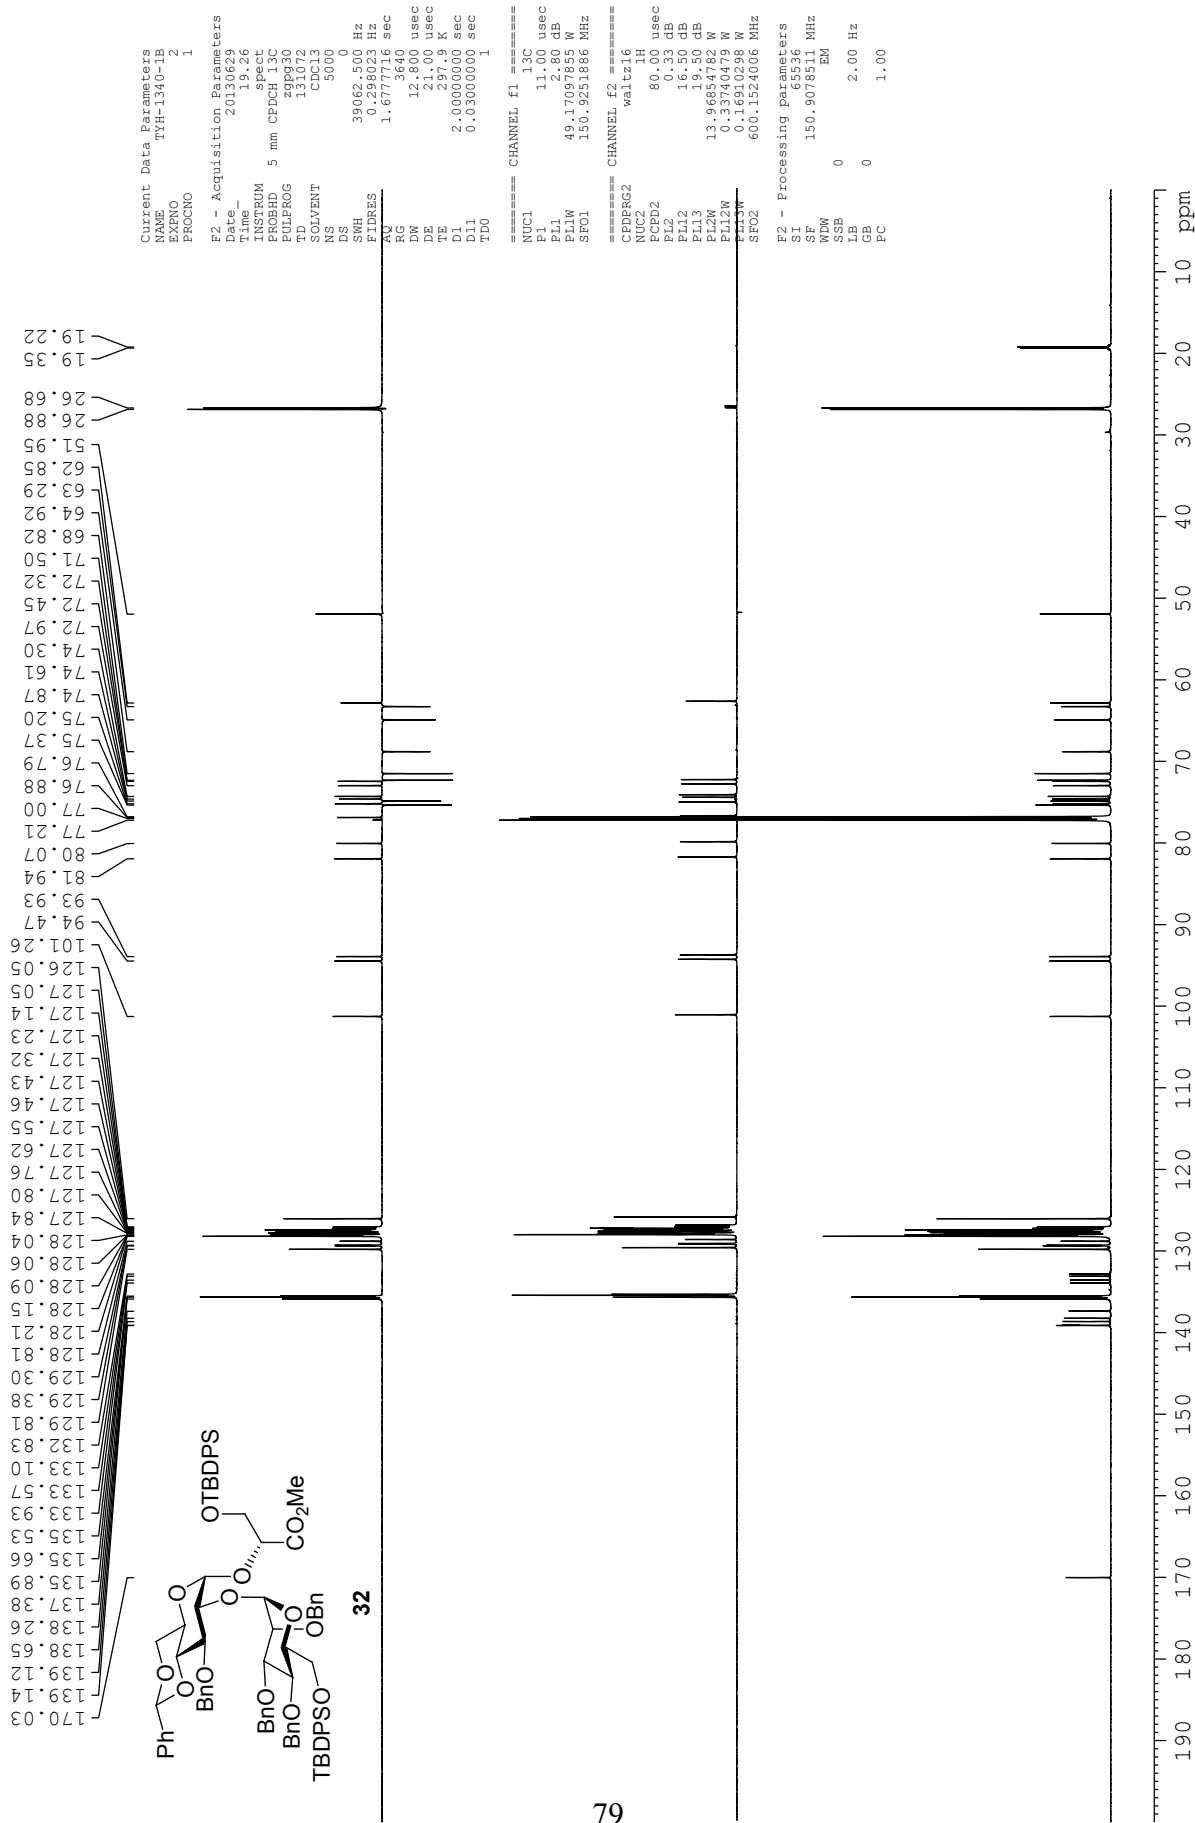

Supplement: c3ob42097c.pdf [file c3ob42097c.pdf]
